# Supplementary material for: Association between retinal markers and cognition in older adults: a systematic review
Source: PubMed Central journal article supplement — BMJ Open. 2022 Jun 20;12(6):e054657. doi: 10.1136/bmjopen-2021-054657 (PMC9214387; doi:10.1136/bmjopen-2021-054657), 2022-06-20
Supplement: bmjopen-2021-054657.draft_revisions.pdf [file bmjopen-2021-054657.draft_revisions.pdf]

# BMJ Open

BMJ Open is committed to open peer review. As part of this commitment we make the peer review history of every article we publish publicly available.

When an article is published we post the peer reviewers' comments and the authors' responses online. We also post the versions of the paper that were used during peer review. These are the versions that the peer review comments apply to.

The versions of the paper that follow are the versions that were submitted during the peer review process. They are not the versions of record or the final published versions. They should not be cited or distributed as the published version of this manuscript.

BMJ Open is an open access journal and the full, final, typeset and author-corrected version of record of the manuscript is available on our site with no access controls, subscription charges or pay-per-view fees (<http://bmjopen.bmj.com>).

If you have any questions on BMJ Open's open peer review process please email [info.bmjopen@bmj.com](mailto:info.bmjopen@bmj.com)

# BMJ Open

## Diagnostic utility of retinal scanning for assessing cognition in older adults: a systematic review

|                               |                                                                                                                                                                                                                                                                                                                                                                                                                                                |
|-------------------------------|------------------------------------------------------------------------------------------------------------------------------------------------------------------------------------------------------------------------------------------------------------------------------------------------------------------------------------------------------------------------------------------------------------------------------------------------|
| Journal:                      | <i>BMJ Open</i>                                                                                                                                                                                                                                                                                                                                                                                                                                |
| Manuscript ID                 | bmjopen-2021-054657                                                                                                                                                                                                                                                                                                                                                                                                                            |
| Article Type:                 | Original research                                                                                                                                                                                                                                                                                                                                                                                                                              |
| Date Submitted by the Author: | 20-Jun-2021                                                                                                                                                                                                                                                                                                                                                                                                                                    |
| Complete List of Authors:     | Jeevakumar, Varshanie; Macquarie University, Australian Institute of Health Innovation<br>Chan, Joyce; New Look Eyewear<br>Gopinath, Bamini; Macquarie University, Department of Linguistics, Australian Hearing Hub<br>Liew, Gerald; The University of Sydney, Centre for Vision Research<br>Siette, Joyce; Macquarie University, Australian Institute of Health Innovation; Macquarie University, Centre for Ageing, Cognition and Wellbeing |
| Keywords:                     | OPHTHALMOLOGY, Medical ophthalmology < OPHTHALMOLOGY, Neuro-ophthalmology < OPHTHALMOLOGY, Dementia < NEUROLOGY, HAEMATOLOGY                                                                                                                                                                                                                                                                                                                   |
|                               |                                                                                                                                                                                                                                                                                                                                                                                                                                                |

SCHOLARONE™  
Manuscripts

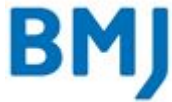

I, the Submitting Author has the right to grant and does grant on behalf of all authors of the Work (as defined in the below author licence), an exclusive licence and/or a non-exclusive licence for contributions from authors who are: i) UK Crown employees; ii) where BMJ has agreed a CC-BY licence shall apply, and/or iii) in accordance with the terms applicable for US Federal Government officers or employees acting as part of their official duties; on a worldwide, perpetual, irrevocable, royalty-free basis to BMJ Publishing Group Ltd ("BMJ") its licensees and where the relevant Journal is co-owned by BMJ to the co-owners of the Journal, to publish the Work in this journal and any other BMJ products and to exploit all rights, as set out in our [licence](#).

The Submitting Author accepts and understands that any supply made under these terms is made by BMJ to the Submitting Author unless you are acting as an employee on behalf of your employer or a postgraduate student of an affiliated institution which is paying any applicable article publishing charge ("APC") for Open Access articles. Where the Submitting Author wishes to make the Work available on an Open Access basis (and intends to pay the relevant APC), the terms of reuse of such Open Access shall be governed by a Creative Commons licence – details of these licences and which [Creative Commons](#) licence will apply to this Work are set out in our licence referred to above.

Other than as permitted in any relevant BMJ Author's Self Archiving Policies, I confirm this Work has not been accepted for publication elsewhere, is not being considered for publication elsewhere and does not duplicate material already published. I confirm all authors consent to publication of this Work and authorise the granting of this licence.

# Diagnostic utility of retinal scanning for assessing cognition in older adults: a systematic review

Varshanie Jeevakumar<sup>1</sup>, Joyce Chan<sup>2</sup>, Bamini Gopinath<sup>3</sup>, Gerald Liew<sup>4</sup>, Joyce Siette<sup>1,5\*</sup>,

1. Australian Institute of Health Innovation, Macquarie University, Sydney, New South Wales, Australia
2. New Look Eyewear, Maitland, Sydney, NSW, Australia
3. Department of Linguistics, Australian Hearing Hub, Macquarie University, Sydney, NSW, Australia
4. Department of Ophthalmology, Faculty of Medicine, Westmead Institute for Medical Research, University of Sydney, Sydney, NSW, Australia
5. Centre for Cognition, Ageing and Wellbeing, Macquarie University, Sydney, NSW, Australia

\*Correspondence to Dr Joyce Siette; joyce.siette@mq.edu.au

## ABSTRACT

**Objectives** To appraise the existing literature on the use of retinal scanning for assessing cognitive impairment in adults aged 65 years and over, analyse its efficacy in comparison to standard cognitive screening tests and provide directions for future research.

**Design** Systematic review of peer-reviewed empirical articles investigating the diagnostic utility of retinal scanning in assessing cognitive impairment.

**Data sources** Three electronic databases, Medline, PsychINFO, and EMBASE were searched from inception until October 2020.

**Eligibility criteria** All empirical articles in the English language investigating diagnostic utility of retinal scanning in humans aged  $\geq 65$  years using various methodologies including Optical Coherence Tomography (OCT), in assessing diagnosed cases of dementia were included. Studies with no explicit association between retinal scanning findings and cognition were excluded. Risk of bias was assessed using the QUADAS Tool.

**Data extraction and synthesis** Data extraction was conducted by one author and reviewed by another. Results were synthesised and described narratively.

**Results** Forty-seven eligible studies examining 4,119 older adults were included. Majority of studies were cross-sectional (n=44) and were clinic- or hospital-based. OCT was the most commonly used retinal methodology to measure thickness of four retinal layers (nerve fibre layer, ganglion cell complex, choroid, and macula). Cross-sectional studies identified a positive correlation between retinal measures and cognition with 51.1% of studies using OCT detecting a significant positive relationship between the thinning of at least one retinal area and poorer cognition. Longitudinal studies (n=3) using OCT also identified significant reductions in nerve fibre layer thickness associated with cognitive decline. Study quality was overall moderate but limited due to lack of generalisability.

1  
2  
3 **Conclusion** Current retinal scanning methods have the potential to detect cognitive impairment in  
4  
5 older adults. Further longitudinal studies are required before recommending implementation of OCT  
6  
7 as a universal screening tool in clinical practice.  
8  
9

10  
11 **PROSPERO registration number:** CRD42020176757  
12

13  
14 **Key words:** Retinal scanning, cognitive screening tests, cognitive impairment, optical coherence  
15  
16 tomography, ganglion cell complex, choroid, macula  
17  
18  
19

## 20 21 **STRENGTHS AND LIMITATIONS OF THIS STUDY**

- 22  
23  
24 • This systematic review provides an in-depth evaluation of the relationship between retinal  
25  
26 scanning methods and early detection of cognitive impairment in older adults to inform future  
27  
28 clinical practice.  
29
- 30  
31 • This review includes a substantially larger number of empirical articles than previous  
32  
33 systematic reviews, as well as the inclusion of three longitudinal studies to establish cause-  
34  
35 and-effect relationships between retinal scanning and cognitive deterioration.  
36
- 37  
38 • These studies were methodologically rated using appropriate tools.  
39
- 40  
41 • The included studies may not be representative of the sample population as individuals with  
42  
43 chronic conditions were excluded.  
44  
45  
46  
47  
48  
49  
50  
51  
52  
53  
54  
55  
56  
57  
58  
59  
60

## INTRODUCTION

The last decade has seen a substantial increase in research focused on the identification, development, and validation of diagnostic and prognostic retinal biomarkers for dementia and Alzheimer's disease (AD).[1] Sensitive retinal biomarkers may be advantageous because they are cost and time efficient, non-invasive, and present a minimal degree of patient risk and a high degree of accessibility.[2] With one in ten Australians aged over 65 with dementia and 50 million people affected worldwide,[3] cognitive impairment is a prevalent issue in our ageing population. With the total estimated worldwide cost of dementia to be US\$818 billion in 2015,[3] earlier detection of cognitive impairment will be of high economic benefit. Early diagnosis could also lower mortality,[4] allow timely access to medication, improve quality of life, stabilise cognitive decline, and minimise preventable hospital visits.[4]

As the retina forms as an outgrowth of the brain during embryological development, retinal structure and function reflects that of the brain and spinal cord.[5] Considering this, retinal scanning may allow detection of dementia before symptoms manifest, unlike traditional screening tests which primarily detect cognitive impairment following presentation of warning signs, such as memory loss.[6] Apart from the effects of normal ageing, marked inter-individual differences in the rate of cognitive decline indicate that other age-associated pathologies may be involved, such as macro- or microvascular disease.

Several pathobiological markers have been suggested as potential predictors of cognitive dysfunction and of these, retinal microvascular signs may offer the most promise. A study by Ong et al. (2015) found an association between retinal neuronal damage and grey matter atrophy, which indicates that retinal scanning may reflect cerebral neurodegenerative changes and thus, predict cognitive decline.[7] Yoon et al. (2019) demonstrated that ventricular enlargement due to cerebral atrophy seen characteristically in Alzheimer's as indicated by previous magnetic resonance imaging

1  
2  
3 studies,[8] is mirrored in retinal microvasculature changes as measured through retinal scanning  
4  
5 tools, such as Optical Coherence Tomography (OCT). OCT is a non-invasive technique that acquires  
6  
7 high resolution, cross sectional images of the retina.[2] The OCT devices often vary, with some users  
8  
9 adopting swept-source OCT (SS-OCT) devices while others used spectral-domain OCT (SD-OCT),  
10  
11 which can impact light source, acquisition speed, and resolution [9]. Therefore, as a common tool in  
12  
13 clinical practice, retinal scanning could be used routinely as an accessible alternative to brain  
14  
15 imaging that is both faster to administer and less stressful to the patient with the potential to measure  
16  
17 and quantify cognitive decline.  
18  
19  
20  
21

22  
23 A recent cross-sectional observation study has demonstrated the value of OCT in detecting  
24  
25 dementia, identifying OCT measurements of the macula as a “useful diagnostic biomarker of  
26  
27 cognitive function”[10] (pg. 117). However, there has been conflicting evidence on the effectiveness  
28  
29 of ophthalmic scanning in mild cognitive impairment (MCI), the precursor of dementia. Almeida et  
30  
31 al. (2019) found a significant correlation between OCT measurements in the inner retinal layers with  
32  
33 cognitive screening assessments, whilst Ito et al. saw no changes on OCT in MCI individuals,  
34  
35 recommending further research.[11]  
36  
37  
38

39  
40 Recent systematic reviews have attempted to analyse the association between cognitive  
41  
42 functioning and retinal nerve fibre layer thickness (RNFL).[12,13] Thomson et al. conducted a  
43  
44 systematic review and meta-analysis of 17 articles and found a statistically significant reduction in  
45  
46 RNFL in both AD and MCI patients when compared to healthy controls.[12] This study identified  
47  
48 OCT as a potential diagnostic tool in assessing cognitive impairment, particularly for AD and MCI  
49  
50 syndromes. Similarly, Wang et al. evaluated the relationship of peripheral RNFL thickness to AD  
51  
52 and MCI in 19 studies and found a progressive reduction in total RNFL thickness, particularly in the  
53  
54 inferior and superior quadrants, suggesting RNFL thickness to be a candidate biomarker for early  
55  
56 detection of AD.[13] However, both systematic reviews appraised only a small number of cross-  
57  
58 sectional studies with no consideration of cognitive impairment in forms other than AD and MCI.  
59  
60



1  
2  
3 The role of the retinal layers other than the nerve fibre layer, including the macula and ganglion cell  
4 complex (GCC) as biomarkers in the assessment of cognitive impairment were also not evaluated.  
5  
6  
7

8 Despite this research, the evidence is limited due to the small sample sizes of the above-  
9 mentioned articles making the findings inconclusive as it underrepresents the target population. This  
10 is due to the extensive exclusion criteria and high comorbidity rate in the older adult population with  
11 the prevalence of concomitant eye and systemic disease such as glaucoma and diabetes making them  
12 unsuitable candidates. Nevertheless, retinal scanning may be valuable in monitoring disease  
13 progression and response to treatment.  
14  
15  
16  
17  
18  
19  
20  
21  
22

23 To date, no systematic review has analysed the specific relationship between retinal scanning  
24 and cognitive screening tests of all retinal layers, and the efficacy of specific retinal screening tools  
25 in diagnosed individuals with dementia. This systematic review aims to summarise the available  
26 evidence on the use of retinal scanning methodologies in older adults and provide directions for  
27 future research.  
28  
29  
30  
31  
32  
33  
34

## 35 **METHODS**

36  
37  
38 We drafted a protocol for this review 'a priori' and inclusion criteria were developed prior to  
39 commencing the search. This review was registered on PROSPERO. We report according to the  
40 Preferred Reporting Items for Systematic Reviews and Meta-Analyses (PRISMA) guidelines, and a  
41 checklist of PRISMA items is presented in the online supplementary data S1.  
42  
43  
44  
45  
46  
47

### 48 **Ethics approval statement**

49  
50 We used publicly accessible documents as evidence and did not collect individual personal  
51 information from participants. As such it was not necessary to seek an institutional ethics approval  
52 before commencing our review.  
53  
54  
55  
56  
57

### 58 **Search strategy**

1  
2  
3 A search strategy was developed using medical subject headings (MeSH) and key search  
4 terms related to cognitive impairment and retinal scanning. Studies were identified through Medline  
5 (1806 – 2020), PsychINFO (1905 – 2020) and EMBASE (1974 – 2020) databases. An updated  
6 literature search was undertaken prior to the final analysis to ensure up-to-date and relevant articles  
7 were included. Date last searched was 23 October 2020. The search strategy (available in online  
8 supplementary data S2) was deliberately broad in an effort to gather all eligible studies and was  
9 developed in collaboration with the clinical librarian and reviewed by the project team. Reference  
10 lists of all included studies were hand-searched for additional records. This search strategy was then  
11 adapted to the other databases, PsychINFO and EMBASE.  
12  
13  
14  
15  
16  
17  
18  
19  
20  
21  
22  
23

### 24 **Eligibility Criteria**

25  
26  
27 All peer-reviewed empirical articles in English and using human subjects, including but not  
28 limited to cross-sectional, population-based, case-control and longitudinal studies. Studies with no  
29 explicit association between cognition and findings on retinal scanning were excluded.  
30  
31  
32  
33  
34

35 *Participants:* Inclusion criteria comprised of adults aged 65 years and over with diagnosed  
36 cognitive impairment of any form and severity, including AD, Frontotemporal, and Diffuse Lewy  
37 Body Dementia, and mild cognitive impairment, and a control group of cognitively healthy  
38 participants. The study was limited to subjects aged over 65 as diagnosis of dementia is more  
39 prevalent in this age group. Exclusion criteria includes those with pre-existing ophthalmological,  
40 metabolic, cardiovascular, cerebrovascular, psychiatric, or other disease that could affect the visual  
41 field or neurological system. Other exclusion criteria include previous intraocular surgery or trauma,  
42 the inability of the participant to collaborate sufficiently to perform an Optical Coherence  
43 Tomography (OCT) scan, and/or use of medications that could affect visual function.  
44  
45  
46  
47  
48  
49  
50  
51  
52  
53  
54  
55

56 *Types of index and reference standard tests:* All participants in the chosen studies were  
57 screened using standard, traditional cognitive screening tests such as Mini-Mental State Examination  
58  
59  
60

1  
2  
3 (MMSE) and retinal scanning using Optical Coherence Tomography (OCT), Optical Coherence  
4 Tomography Angiography (OCTA) or another technique (available in online supplementary data  
5 S2).  
6  
7  
8  
9

10 *Controls or comparators:* Cross-sectional and cohort studies will not have a comparator, but  
11 a case-control study should have an age- and sex-matched control group of cognitively healthy  
12 participants.  
13  
14  
15  
16

### 17 **Data Extraction**

18  
19  
20  
21 The search results from Medline, PsychINFO and EMBASE were exported to Excel and  
22 duplicates were removed. Two authors (VJ and JS) reviewed titles, abstracts and full-text papers for  
23 eligibility. Authors resolved disagreement by discussion or, where necessary, a third author (JC)  
24 offered their view. Extraction was completed (VJ) using a standardised data sheet that was piloted  
25 with three papers and revised. All data extraction was verified by JS, and disagreement was resolved  
26 via discussion. Extracted data included, study design, participant demographics (including mean age,  
27 country of study), sample size, method of and parameters measured on retinal scanning, measure of  
28 cognitive function, type and degree of cognitive impairment, and relevant statistical data.  
29  
30  
31  
32  
33  
34  
35  
36  
37  
38  
39

### 40 **Risk of bias assessment**

41  
42  
43 The QUADAS Tool [14] was used as it assesses the quality of studies looking at diagnostic  
44 accuracy. This covers spectrum, disease progression, partial verification, differential verification,  
45 incorporation and review bias, and incomplete data outcomes e.g. withdrawals. Two reviewers (VJ,  
46 JS) partook in the studies' quality assessment and any discrepancy between reviewers was resolved  
47 through discussion and if an agreement could not be reached, a third individual was consulted (JC).  
48  
49  
50  
51  
52  
53  
54

### 55 **Statistical Analysis**

Owing to a high degree of heterogeneity that exists between studies, including study designs, population type, measures of retinal scanning and cognition, a meta-analysis of study results was not possible. A descriptive synthesis approach was utilised.

## Patient and public involvement

No patient involved.

## RESULTS

### Study design and populations

The search identified 821 articles, of which 47 were eligible (see **Figure 1**). Most studies included were cross-sectional (42/47; 89.4%), with a few case-controls (2/47; 4.3%) and longitudinal (3/47; 6.4%) studies (**Table 1**). Longitudinal studies had a range of two to 12-year follow-ups. One of these longitudinal studies explored the relationship between retinal measures and the evolution of cognitive performance in an elderly population with no formal diagnosis of dementia.

Four (8.5%) studies were population-based with the remainder either clinic- (19/47; 40.4%) or hospital-based (13/47; 27.7%) (**Table 1**). Controls were recruited either from the community or were the spouses of the cases. Studies were mostly conducted in the USA (10/47; 21.3%) and Spain (8/47; 17.0%) followed by Italy (6/47; 12.8%) then Turkey (5/47; 10.6%) and China (4/47; 8.5%), Brazil (3/47; 6.4%) and Korea (3/47; 6.4%), Netherlands (2/47; 4.3%) and Germany (2/47; 4.3%), and finally United Kingdom (1/47; 2.1%), Israel (1/47; 2.1%), Rome (1/47; 2.1%), and France (1/47; 2.1%). The type of cognitive impairment varied between studies with 37 (78.7%) articles looking at Alzheimer's Dementia (AD), 19 (40.4%) at mild cognitive impairment (MCI), five (10.6%) at Parkinson's Dementia (PD), one (2.1%) at Lewy Body Dementia (LBD) and one (2.1%) at Frontotemporal dementia (FTD). Across all studies, the mean age range was 71 years for controls, 73 years for AD, 66 years for FTD, 74 years for LBD, 66 years for PD and 73 years for MCI. The ratio

1  
2  
3 of males to females was approximately one-to-one across all studies, with a slight female  
4  
5 predominance.  
6  
7

### 8 **Assessment of retinal abnormalities**

9

10  
11 Retinal scanning was performed using several techniques (**Table 1, Supplementary**  
12 **Material**). The most common was Optical Coherence Tomography (OCT) (44/47, 93.6%; SD-OCT  
13 (18/47); SS-OCT (1/47)) followed by Optical Coherence Tomography Angiography (OCTA) (8/47;  
14 17.0%) then Fluorescence Lifetime Imaging Ophthalmoscopy (FLIO) (1/47; 2.1%), laser Doppler  
15 flowmetry (1/47; 2.1%) and fundus photography (1/47; 2.1%). OCT is a non-invasive method that  
16 obtains cross-sectional images of the retina and calculates the thickness of all retinal layers including  
17 the nerve fibre layer, ganglion cell complex, choroid and macula. In 12 (25.5%) studies, the Early  
18 Treatment of Diabetic Retinopathy Study (ETDRS) macular map sectors were used to divide the  
19 macula into nine segments to produce a retinal thickness map. The retinal nerve fibre layer (RNFL)  
20 thickness was calculated globally, and across either four or six segments.  
21  
22  
23  
24  
25  
26  
27  
28  
29  
30  
31  
32  
33  
34

35 On the other hand, OCTA acquires images of retinal vasculature to calculate perfusion and  
36 vascular density (VD), and foveal avascular zone (FAZ) area,[5] whereas laser Doppler flowmetry  
37 calculates the retinal blood flow rate.[15] FLIO measures the autofluorescence intensity emitted by  
38 endogenous fluorophores contained within the retina to calculate retinal metabolic activity.[16,17]  
39 Fundus photography was also employed to obtain detailed images of the fundus within a 50-degree  
40 field of view of the macula, and the optic nerve head to evaluate retinal vasculature.[18]  
41  
42  
43  
44  
45  
46  
47  
48

49 As part of the work-up, a full ophthalmological scan was performed in 28 (59.6%) studies  
50 prior to retinal imaging, including assessment of best-corrected visual acuity (BCVA), dilated fundus  
51 scan, slit lamp scan of the anterior segment of the eye, intraocular pressure (IOP) measurement, and  
52 anatomical ocular measurements with optical biometry. Neuroimaging was performed in 18 (38.3%)  
53 studies to exclude alternate diagnoses, and nine (19.1%) studies used standard blood tests to rule out  
54  
55  
56  
57  
58  
59  
60

1  
2  
3 reversible causes of dementia. A physical neuropsychological examination was part of the initial  
4  
5 work-up in 11 (23.4%) studies.  
6  
7

### 8 **Assessment of cognitive function and impairment**

9

10  
11 A summary of the assessment of cognitive function is shown in **Table 2**. Cognitive function  
12  
13 was always measured using standard cognitive screening tools, such as Mini Mental State Examination  
14  
15 (MMSE) (41/47; 87.2%), Montreal Cognitive Assessment (MoCA) (5/47; 10.6%) and the global  
16  
17 clinical dementia rating score (CDR) (1/47; 2.1%). These screening tests evaluate various cognitive  
18  
19 domains including, orientation, attention, executive functions, memory, language, visuospatial skills,  
20  
21 abstract thinking, and calculations. Cognitive screening tests were conducted by either neurologists,  
22  
23 psychologists, physicians, or research associates.  
24  
25  
26  
27

28 AD was diagnosed using DSM-IV criteria (6/47; 12.8%), National Institute of Neurologic and  
29  
30 Communicative Disorders and Stroke-Alzheimer's Disease and Related Disorders Association  
31  
32 (NINCDS-ADRDA)[19] criteria (15/47; 31.9%) or a combination of both (12/47; 25.5%). The most  
33  
34 common method to diagnose MCI was through the Peterson's criteria,[20] (6/47; 12.8%) which  
35  
36 identifies whether all five criteria are satisfied including, memory complaint corroborated by an  
37  
38 informant, objective memory decline, normal general cognitive function, normal functional activities,  
39  
40 and absent dementia diagnosis. Rascovsky criteria,[21] (1/47; 2.1%) which consists of a series of  
41  
42 persistent or recurrent behavioural and cognitive symptoms was used for the diagnosis of FTD. LBD  
43  
44 was diagnosed via the McKeith Criteria,[22] (1/47; 2.1%), which includes dementia coexisting with  
45  
46 two of the following symptoms, delirium-like fluctuating cognition, repeated visual hallucinations,  
47  
48 REM sleep behaviour disorder and parkinsonism. Diagnosis of PD was through recommendations  
49  
50 from the Movement Disorder Society Task Force,[23] (2/47; 4.3%) whether all five criteria are  
51  
52 satisfied including, Parkinson's disease diagnosis based on Queen's Square Brain Bank criteria,  
53  
54  
55  
56  
57  
58  
59  
60

1  
2  
3 Parkinson's disease developed prior to dementia onset, MMSE less than 26, cognitive deficits severe  
4  
5 enough to impact ADLs and impairment in more than one cognitive domain.  
6  
7

### 8 **Association between cognition and retinal measurements**

9

10  
11 Using OCT, the majority of studies found a significant correlation between RNFL (9/17,  
12 52.9%) and ganglion cell inner plexiform layer (GC-IPL) thinning (6/11, 54.5%) with impaired  
13 cognition (**Table 2**). Some studies found a significant correlation between macular (7/17, 41.2%),  
14 macular retinal nerve fibre layer (mRNFL) (1/3, 33.3%), GCC (4/12, 33.3%), choroidal thickness  
15 (CT) (1/4, 25.0%) and peripapillary retinal nerve fibre layer (pRNFL) thinning (4/22, 18.2%) with  
16 cognitive deterioration. These findings did not vary significantly between different OCT devices.  
17  
18 Measures of retinal vascular structures using OCTA identified a correlation between VD (2/5,  
19 40.0%), retinal vasculature (1/6, 16.7%) and FAZ area (1/7, 14.3%) with cognitive impairment.  
20  
21  
22  
23  
24  
25  
26  
27  
28  
29

### 30 **Risk of Bias Assessment**

31

32  
33 Risk of bias of the 47 studies are provided in **Table 3**. The average QUADAS score was 10.8  
34 with 35 (74.5%) studies scoring 10 or above. In 34 (72.3%) studies it was unclear whether the index  
35 test results were interpreted without the knowledge of the reference standard, and vice versa in 32  
36 (68.1%) studies. This could contribute to review bias, and thus impact the diagnostic accuracy of the  
37 clinical tool. The time period between conducting the reference standard and index test was unclear in  
38 15 (31.9%) studies, suggesting that the influence of disease progression bias cannot be excluded. All  
39 49 studies were not representative of the target population as patients with comorbidities that may  
40 affect the retina, including diabetes mellitus and hypertension were excluded. This lack of  
41 generalisability may interfere with the implementation of retinal scanning in clinical practice.  
42  
43 However, the majority of studies (93.6%) provided a clear selection criterion, and all studies utilised  
44 an accurate reference standard. Partial verification, differential verification, incorporation, and clinical  
45  
46  
47  
48  
49  
50  
51  
52  
53  
54  
55  
56  
57  
58  
59  
60

1  
2  
3 review bias were minimal across the included studies. Considering this, the overall risk of bias was  
4  
5 moderate, and findings should be interpreted with caution.  
6  
7

## 8 **DISCUSSION**

9

10  
11 Our review evaluated the relationship between retinal scanning methods and early detection  
12  
13 of cognitive impairment in older adults to inform future clinical practice. Over 50% of the studies  
14  
15 using OCT identified (25/47, 53.2%) a positive correlation between the thinning of at least one  
16  
17 retinal area and cognitive impairment. The future of retinal imaging as a clinically useful tool for  
18  
19 measuring cognition in older adults is considered.  
20  
21  
22

23  
24 Within ophthalmology, retinal imaging devices are primarily used in the diagnosis of retinal  
25  
26 disease as well as serial monitoring of retinal conditions such as age-related macular degeneration  
27  
28 and response to treatment [9]. We identified two main retinal scanning devices, OCT and OCTA in  
29  
30 this review, with a far more sensitive response from OCT. OCTA was primarily used to measure and  
31  
32 evaluate retinal vasculature, but measures of retinal thickness via OCT was considerably more  
33  
34 effective in detecting cognitive impairment. Studies using OCTA techniques have resulted in mixed  
35  
36 findings.[24] This may be due to the varied vessel distribution and morphology, including vessel size  
37  
38 and number of anastomoses between participants. The lack of uniformity in vessel size may affect  
39  
40 vessel density calculations, as the smaller surface area of capillaries may contribute to a more  
41  
42 sensitive measure of perfusion compared to larger vessels [19]. Additionally, fewer anastomoses  
43  
44 within a vessel network contributes to a higher risk of vascular dysfunction [19]. Considering this  
45  
46 wide variability in vascular network structure between individuals, OCTA may be suitable for  
47  
48 detecting later stages of dementia but may not be reliable in detecting the transition between age-  
49  
50 related changes and mild cognitive impairment. Furthermore, not all participants with MCI will  
51  
52 convert to dementia, some may revert to normal cognition, thus affecting the accuracy of the  
53  
54  
55  
56  
57  
58  
59  
60



1  
2  
3 results.[19] Retinal layer thickness as measured through OCT does not vary as extensively as OCTA  
4  
5 and thus, serves as a suitable alternative in the early detection of dementia.  
6  
7

8  
9 Although OCT devices have been utilised for the past two decades, there has been no  
10  
11 consistent retinal area that is strongly associated with the cognitive function of older adults. This is  
12  
13 consistent across all types of OCT devices. Our findings found that thinning of the RNFL and  
14  
15 pRNFL were initially associated with poorer cognitive function, however, within the last decade a  
16  
17 large proportion of studies have identified a positive correlation. Our review found that since 2016,  
18  
19 four (33.3%) of the 12 studies evaluating pRNFL have identified a positive relationship [11, 25, 26,  
20  
21 27]. Similarly, in the last decade, 64.3% of studies using OCT devices to measure RNFL thickness  
22  
23 have identified a positive correlation with cognitive impairment, whereas previously no correlation  
24  
25 was found. However, researchers have failed to consistently identify a correlation between retinal  
26  
27 scanning and cognitive impairment, for example two recent articles identified an association [19, 20]  
28  
29 with RNFL whereas two did not [21,22]. This lack of consistency is reflected across all retinal areas  
30  
31 and the discrepancies may in part be ascribed to differences in sample size, the severity of cognitive  
32  
33 impairment, and the OCT technology used.  
34  
35  
36  
37  
38

39  
40 Indeed, mean RNFL and macular thickness is largely dependent on the type of OCT device  
41  
42 used [23]. The variety of devices may affect the consistency of results across studies. Considering  
43  
44 this, OCT thickness measurements from different studies should be compared with caution.  
45  
46 Moreover, as MCI represents a transition towards dementia, reductions in pRNFL and macular  
47  
48 thickness, if any, are likely to be subtle, perhaps even within the normal range, when compared with  
49  
50 healthy age-matched control subjects. Furthermore, these cross-sectional studies present data at a  
51  
52 single point in time after the participant has been diagnosed with cognitive impairment. The lack of  
53  
54 baselines measures when the participant is well, creates difficulty in detecting these subtle changes.  
55  
56  
57 Therefore, findings need to be interpreted with caution.  
58  
59  
60

1  
2  
3 The inconsistencies between studies can also be attributed to the lack of sensitivity of  
4  
5 cognitive screening tools, such as the MMSE which is largely used to assess cognition, but we know  
6  
7 is ineffective in identifying cognitive impairment at its early stages [28]. Despite these mixed results,  
8  
9 cross-sectional studies present data at a single point in time and therefore, the dynamic change in the  
10  
11 relationship between retinal thickness and cognition is unable to be quantified. It seems therefore that  
12  
13 with only limited evidence thus far, caution will be needed in interpreting the rate of change of an  
14  
15 individual's RNFL thickness in terms of their neurological status. Furthermore, given the  
16  
17 physiological variations in RNFL thickness, single time-point measurements in individual  
18  
19 participants are likely to have limited value.  
20  
21  
22  
23

24  
25 Our review innovates by appraising three large longitudinal studies [29,30,31] to further  
26  
27 establish cause-and-effect relationships between retinal scanning and cognitive deterioration. We  
28  
29 found that OCT measurements of RNFL thickness including inferior quadrant RNFL thickness [29]  
30  
31 and pRNFL thickness [30] was able to detect reductions in these areas over time, and was associated  
32  
33 with decline in cognitive abilities such as impaired recall [29], immediate and delayed memory [29]  
34  
35 and episodic memory [30]. Cognitive decline was found to be associated with longitudinal reduction  
36  
37 in inferior quadrant thickness [30]. These results highlight the ability of OCT to detect longitudinal  
38  
39 changes in RNFL thickness and declining cognition.  
40  
41  
42

43  
44 A systematic review by Ding et al. (2008) [32] evaluated six studies and identified a positive  
45  
46 relationship between retinal vascular signs, and information processing speed, verbal memory, and  
47  
48 executive function. However, the lack of consistency between study findings due to differences in  
49  
50 retinal scanning methodology, small sample size, and cognitive screening tools were recognised and  
51  
52 limited interpretation. An updated review by Heringa et al. (2013) [33] identified a moderately strong  
53  
54 association between microvascular and cerebral changes, and dementia diagnosis across 32 studies.  
55  
56 They concluded that although retinal vascular assessment can be incorporated into prediction  
57  
58 models, only a minority of dementia cases were attributed to retinal vascular changes. These reviews  
59  
60

1  
2  
3 support the potential role of retinal vascular changes in the pathophysiology of cognitive impairment  
4  
5 but recommend the need for more prospective data. Our review adds to the existing literature by  
6  
7 providing greater insight into the role of OCT in the early detection of cognitive impairment through  
8  
9 measures of retinal layer thickness.  
10  
11  
12

13 Our study has several limitations. First, participants in the included studies were not  
14  
15 representative of the sample population and individuals with chronic conditions, such as diabetes  
16  
17 mellitus, hypertension and neurological conditions were excluded. These comorbidities are common  
18  
19 in the older population and affect the generalisability of our findings. Further studies including  
20  
21 patients with these comorbidities are required to identify whether retinal scanning is a viable  
22  
23 biomarker in cognitive impairment. Second, some studies were missing data in several domains, such  
24  
25 as cognition scores or correlation metrics, which excluded their entry in the review and may  
26  
27 compromise publication bias. Third, our search strategy was very specific, and this may have  
28  
29 excluded studies that were relevant to our review. Fourth, only eight studies evaluating OCTA were  
30  
31 included in this review resulting in mixed findings. This may explain why other studies specifically  
32  
33 assessing OCTA with a larger sample size may have identified a positive correlation.[24]  
34  
35  
36  
37  
38

39 Our study has some strengths. This is the first systematic review that has evaluated multiple  
40  
41 retinal scanning tools across several forms of cognitive impairment. We reviewed extensively more  
42  
43 empirical articles than previous systematic reviews [32,33], comprising of a larger, international  
44  
45 sample and summarised the recent results of longitudinal studies, adding substantial insight.  
46  
47  
48

49 Earlier diagnosis of dementia using non-invasive techniques will improve patient care,  
50  
51 quality of life, disease management, and clinical outcome[4]. Cognitive screening tools currently  
52  
53 used in routine clinical practice, such as MMSE are not sensitive in detecting cognitive impairment  
54  
55 in its earlier stages, are time-consuming and can be stressful for the patient[28]. OCT is a sensitive  
56  
57 alternative that provides a rapid assessment of the retina to detect changes consistent with cognitive  
58  
59  
60

1  
2  
3 impairment, such as RNFL thinning. Advances in OCT technology, especially the advent of Fourier-  
4 domain OCT (ED-OCT), and more recently SS-OCT, which improves acquisition speed and  
5 resolution of retinal images, will further make accurate quantitative segmented retinal layer analysis  
6 possible. Introducing OCT as part of the Medicare Benefits Schedule (MBS) could allow  
7  
8 optometrists to additionally provide annual cognitive screening to older adults. This would enable  
9  
10 earlier detection of cognitive impairment and thus the provision of both pharmacological and non-  
11  
12 pharmacological interventions to slow or stabilise disease progression[4].  
13  
14  
15  
16  
17  
18  
19

20 In conclusion, whilst cross-sectional studies have inconsistently recognised a link between  
21  
22 retinal scanning methods and cognitive impairment, recent longitudinal studies provide stronger  
23  
24 evidence on the diagnostic utility of OCT in detecting a declining cognitive status. Further  
25  
26 longitudinal studies should be conducted to corroborate these findings before retinal scanning can be  
27  
28 introduced into clinical practice as a viable tool for detecting cognitive impairment. Studies using  
29  
30 more sensitive cognitive screening tools are required to assess the viability of retinal measures as a  
31  
32 biomarker in cognitive decline.  
33  
34  
35  
36  
37  
38  
39  
40  
41  
42  
43  
44  
45  
46  
47  
48  
49  
50  
51  
52  
53  
54  
55  
56  
57  
58  
59  
60

## DECLARATIONS

## ACKNOWLEDGMENTS

The authors would like to thank Dr Tejal Shah at Macquarie University with her help during this review.

## CONTRIBUTORS

JS conceptualised the study and produced with VJ the first draft of the manuscript. BG reviewed the study design and provided feedback. JS and VJ devised the search strategy which was carried out by VJ. JS completed the blinded 5% review of abstracts with BG acting as arbitrator. VJ reviewed the remainder of the abstracts. JS and VJ carried out the full-text review, followed by the data extraction and quality assessment of included articles. VJ developed the initial frameworks with JS providing feedback. All authors contributed to revisions of subsequent manuscript drafts and approved the final submission,

## FUNDING

This body of work was not funded.

## COMPETING INTERESTS

The authors declare that they have no conflicts of interest to disclose.

## PATIENT CONSENT FOR PUBLICATION

Not required.

## DATA AVAILABILITY STATEMENT

Data are available upon reasonable request. The data are available upon request from the corresponding author ([joyce.siette@mq.edu.au](mailto:joyce.siette@mq.edu.au))

## FIGURES AND TABLES

**Figure 1.** Preferred Reporting Items for Systematic Reviews and Meta-Analyses (PRISMA) flowchart describing the process of study selection.

For peer review only

Table 1. Characteristics of studies included in the systematic review

1  
2  
3  
4  
5  
6  
7  
8  
9  
10  
11  
12  
13  
14  
15  
16  
17  
18  
19  
20  
21  
22  
23  
24  
25  
26  
27  
28  
29  
30  
31  
32  
33  
34  
35  
36  
37  
38  
39  
40  
41  
42  
43  
44  
45  
46

| Year | Author       | Country | Design                  | Areas of retina measured |       |       |     |        |       |    |     |    |                |                | Sample size | Method                                   | OCT Machine                                                                              |
|------|--------------|---------|-------------------------|--------------------------|-------|-------|-----|--------|-------|----|-----|----|----------------|----------------|-------------|------------------------------------------|------------------------------------------------------------------------------------------|
|      |              |         |                         | RNFL                     | mRNFL | pRNFL | GCC | GC-IPL | MT/MV | CT | FAZ | VD | RV             | Other          |             |                                          |                                                                                          |
| 2001 | Parisi       | Italy   | CS                      | ✓                        |       |       |     |        |       |    |     |    |                |                | 31          | OCT                                      | OCT1                                                                                     |
| 2006 | Iseri        | Turkey  | CS                      | ✓                        |       |       |     |        |       | ✓  |     |    |                |                | 29          | OCT                                      | OCT Model 3000 unit                                                                      |
| 2011 | Kesler       | Israel  | CS                      | ✓                        |       |       |     |        |       |    |     |    |                |                | 78          | OCT                                      | Stratus OCT3                                                                             |
| 2013 | Kirbas       | Turkey  | CS                      | ✓                        |       | ✓     |     |        |       |    |     |    |                |                | 80          | SD-OCT                                   | SD-OCT                                                                                   |
| 2013 | Moreno-Ramos | Spain   | CS                      | ✓                        |       |       |     |        |       |    |     |    |                |                | 40          | OCT                                      | TOPCON 3D OCT-1000                                                                       |
| 2013 | Shen         | China   | Longitudinal            | ✓                        |       |       |     |        |       |    |     |    |                |                | 78          | OCT                                      | ZEISS Cirrus HD-OCT 4000 OCT                                                             |
| 2014 | Ascaso       | Spain   | CS                      | ✓                        |       |       |     |        |       | ✓  |     |    |                |                | 90          | OCT                                      | Stratus OCT3                                                                             |
| 2014 | Gharbiya     | Italy   | CS                      |                          |       | ✓     |     |        |       | ✓  |     |    |                | ✓ <sup>1</sup> | 42          | SD-OCT                                   | Heidelberg Spectralis with Heidelberg Eye Explorer                                       |
| 2014 | Polo         | Spain   | CS                      | ✓                        |       |       |     |        |       |    |     |    |                |                | 140         | OCT                                      | Cirrus and Spectralis OCT devices                                                        |
| 2015 | Bambo        | Spain   | CS                      |                          |       | ✓     |     |        |       |    |     |    |                |                | 112         | OCT                                      | Cirrus OCT                                                                               |
| 2015 | Bayhan       | Turkey  | CS                      |                          |       |       | ✓   |        |       | ✓  |     |    |                | ✓ <sup>2</sup> | 61          | SD-OCT                                   | RTVue OCT system                                                                         |
| 2015 | Feke         | USA     | CS                      |                          |       | ✓     |     |        |       |    |     |    | ✓ <sup>3</sup> |                | 52          | Laser Doppler retinal blood flow and OCT | Canon laser Doppler retinal blood flow instrument (CLBF 100, Canon) and Stratus OCT 3000 |
| 2015 | Gao          | China   | CS                      |                          |       | ✓     |     |        |       | ✓  |     |    |                |                | 72          | OCT                                      | Cirrus HD-OCT 4000                                                                       |
| 2015 | Gunes        | Turkey  | Case-control (CC) study |                          |       | ✓     |     |        |       |    |     |    |                |                | 80          | SD-OCT                                   | Spectral-domain OCT (Spectral OCT SLO, OPKO / OTI Instrumentation)                       |
| 2015 | Jentsch      | Germany | CS                      |                          |       | ✓     |     |        |       | ✓  |     |    |                | ✓ <sup>4</sup> | 16          | OCT and fluorescence                     | Cirrus OCT 4.0                                                                           |

|    |      |                 |        |                     |   |   |   |   |   |   |  |  |  |  |  |                |     |                                        |                                                                        |
|----|------|-----------------|--------|---------------------|---|---|---|---|---|---|--|--|--|--|--|----------------|-----|----------------------------------------|------------------------------------------------------------------------|
| 1  |      |                 |        |                     |   |   |   |   |   |   |  |  |  |  |  |                |     | lifetime imaging ophthalmoscopy (FLIO) |                                                                        |
| 2  |      |                 |        |                     |   |   |   |   |   |   |  |  |  |  |  |                |     |                                        |                                                                        |
| 3  |      |                 |        |                     |   |   |   |   |   |   |  |  |  |  |  |                |     |                                        |                                                                        |
| 4  |      |                 |        |                     |   |   |   |   |   |   |  |  |  |  |  |                |     |                                        |                                                                        |
| 5  | 2015 | Oktem           | Turkey | CS                  | ✓ |   |   |   |   |   |  |  |  |  |  |                | 105 | OCT                                    | Zeiss Cirrus HD 5000 model OCT device                                  |
| 6  |      |                 |        |                     |   |   |   |   |   |   |  |  |  |  |  |                |     |                                        |                                                                        |
| 7  |      |                 |        |                     |   |   |   |   |   |   |  |  |  |  |  |                |     |                                        |                                                                        |
| 8  | 2015 | Salobrar-Garcia | Spain  | CS                  |   | ✓ | ✓ |   |   |   |  |  |  |  |  |                | 51  | OCT                                    | OCT Model 3D OCT-1000                                                  |
| 9  |      |                 |        |                     |   |   |   |   |   |   |  |  |  |  |  |                |     |                                        |                                                                        |
| 10 |      |                 |        |                     |   |   |   |   |   |   |  |  |  |  |  |                |     |                                        |                                                                        |
| 11 |      |                 |        |                     |   |   |   |   |   |   |  |  |  |  |  |                |     |                                        |                                                                        |
| 12 |      |                 |        |                     |   |   |   |   |   |   |  |  |  |  |  |                |     |                                        |                                                                        |
| 13 | 2015 | Shi             | China  | Longitudinal        | ✓ |   |   |   |   |   |  |  |  |  |  |                | 78  | OCT                                    | ZEISS Cirrus HD-OCT 4000 OCT                                           |
| 14 |      |                 |        |                     |   |   |   |   |   |   |  |  |  |  |  |                |     |                                        |                                                                        |
| 15 | 2016 | Choi            | Korea  | CS and longitudinal |   |   | ✓ | ✓ | ✓ |   |  |  |  |  |  |                | 134 | OCT                                    | Cirrus High-Definition OCT (HD-OCT, software version 6.0)              |
| 16 |      |                 |        |                     |   |   |   |   |   |   |  |  |  |  |  |                |     |                                        |                                                                        |
| 17 |      |                 |        |                     |   |   |   |   |   |   |  |  |  |  |  |                |     |                                        |                                                                        |
| 18 |      |                 |        |                     |   |   |   |   |   |   |  |  |  |  |  |                |     |                                        |                                                                        |
| 19 | 2016 | Cunha           | Brazil | CS                  |   | ✓ | ✓ | ✓ | ✓ | ✓ |  |  |  |  |  | ✓ <sup>5</sup> | 48  | OCT                                    | Frequency domain-OCT (fd-OCT) using 3D OCT-2000, software version 8.11 |
| 20 |      |                 |        |                     |   |   |   |   |   |   |  |  |  |  |  |                |     |                                        |                                                                        |
| 21 |      |                 |        |                     |   |   |   |   |   |   |  |  |  |  |  |                |     |                                        |                                                                        |
| 22 |      |                 |        |                     |   |   |   |   |   |   |  |  |  |  |  |                |     |                                        |                                                                        |
| 23 |      |                 |        |                     |   |   |   |   |   |   |  |  |  |  |  |                |     |                                        |                                                                        |
| 24 | 2016 | Garcia-Martin   | Spain  | CS                  | ✓ |   |   | ✓ |   |   |  |  |  |  |  | ✓ <sup>6</sup> | 225 | OCT                                    | Spectralis OCT                                                         |
| 25 |      |                 |        |                     |   |   |   |   |   |   |  |  |  |  |  |                |     |                                        |                                                                        |
| 26 | 2016 | Knoll           | USA    | CS                  |   |   | ✓ |   | ✓ | ✓ |  |  |  |  |  |                | 34  | SD-OCT                                 | SD-OCT using Spectralis HRA 1 OCT                                      |
| 27 |      |                 |        |                     |   |   |   |   |   |   |  |  |  |  |  |                |     |                                        |                                                                        |
| 28 |      |                 |        |                     |   |   |   |   |   |   |  |  |  |  |  |                |     |                                        |                                                                        |
| 29 | 2016 | Pillai          | USA    | CS                  | ✓ |   |   | ✓ |   | ✓ |  |  |  |  |  |                | 106 | SD-OCT                                 | SD-OCT using Cirrus 4000 HD-OCT                                        |
| 30 |      |                 |        |                     |   |   |   |   |   |   |  |  |  |  |  |                |     |                                        |                                                                        |
| 31 |      |                 |        |                     |   |   |   |   |   |   |  |  |  |  |  |                |     |                                        |                                                                        |
| 32 | 2016 | Trebbastoni     | Rome   | CS                  |   |   | ✓ |   |   |   |  |  |  |  |  |                | 72  | SD-OCT                                 | Heidelberg Spectralis with Heidelberg Eye Explorer                     |
| 33 |      |                 |        |                     |   |   |   |   |   |   |  |  |  |  |  |                |     |                                        |                                                                        |
| 34 |      |                 |        |                     |   |   |   |   |   |   |  |  |  |  |  |                |     |                                        |                                                                        |
| 35 |      |                 |        |                     |   |   |   |   |   |   |  |  |  |  |  |                |     |                                        |                                                                        |
| 36 | 2017 | Ferrari         | Italy  | CS                  |   |   | ✓ |   | ✓ |   |  |  |  |  |  |                | 93  | OCT                                    | Fourier-domain OCT Heidelberg Spectralis                               |
| 37 |      |                 |        |                     |   |   |   |   |   |   |  |  |  |  |  |                |     |                                        |                                                                        |
| 38 |      |                 |        |                     |   |   |   |   |   |   |  |  |  |  |  |                |     |                                        |                                                                        |
| 39 |      |                 |        |                     |   |   |   |   |   |   |  |  |  |  |  |                |     |                                        |                                                                        |
| 40 | 2017 | Mendez-Gomez    | France | Longitudinal        |   |   | ✓ |   |   |   |  |  |  |  |  |                | 427 | SD-OCT                                 | SD-OCT using Spectralis                                                |
| 41 |      |                 |        |                     |   |   |   |   |   |   |  |  |  |  |  |                |     |                                        |                                                                        |



|    |      |                 |             |    |   |   |   |   |   |   |   |   |   |                 |  |     |                                               |                                                                                                                                                                                 |
|----|------|-----------------|-------------|----|---|---|---|---|---|---|---|---|---|-----------------|--|-----|-----------------------------------------------|---------------------------------------------------------------------------------------------------------------------------------------------------------------------------------|
| 1  | 2018 | Bulut           | Turkey      | CS |   |   |   |   |   |   | ✓ | ✓ | ✓ | ✓ <sup>7</sup>  |  | 52  | OCT angiography (OCTA)                        | Commercial spectral domain OCTA                                                                                                                                                 |
| 2  |      |                 |             |    |   |   |   |   |   |   |   |   |   |                 |  |     |                                               |                                                                                                                                                                                 |
| 3  |      |                 |             |    |   |   |   |   |   |   |   |   |   |                 |  |     |                                               |                                                                                                                                                                                 |
| 4  | 2018 | Jiang           | USA         | CS |   |   |   | ✓ |   |   |   | ✓ |   | ✓ <sup>8</sup>  |  | 52  | 1. OCT A<br>2. OCT                            | 1. Zeiss Angioplex OCTA<br>2. Zeiss OCT                                                                                                                                         |
| 5  |      |                 |             |    |   |   |   |   |   |   |   |   |   |                 |  |     |                                               |                                                                                                                                                                                 |
| 6  |      |                 |             |    |   |   |   |   |   |   |   |   |   |                 |  |     |                                               |                                                                                                                                                                                 |
| 7  | 2018 | Lahme           | Germany     | CS |   |   |   |   |   |   |   | ✓ |   | ✓ <sup>9</sup>  |  | 74  | OCTA                                          | RTVue XR Avanti with AngioVue                                                                                                                                                   |
| 8  |      |                 |             |    |   |   |   |   |   |   |   |   |   |                 |  |     |                                               |                                                                                                                                                                                 |
| 9  | 2018 | Shao            | USA         | CS | ✓ |   |   | ✓ |   |   |   |   |   | ✓ <sup>10</sup> |  | 70  | SD-OCT                                        | SD-OCT using Ultrahigh-resolution OCT (UHR-OCT) device                                                                                                                          |
| 10 |      |                 |             |    |   |   |   |   |   |   |   |   |   |                 |  |     |                                               |                                                                                                                                                                                 |
| 11 |      |                 |             |    |   |   |   |   |   |   |   |   |   |                 |  |     |                                               |                                                                                                                                                                                 |
| 12 |      |                 |             |    |   |   |   |   |   |   |   |   |   |                 |  |     |                                               |                                                                                                                                                                                 |
| 13 | 2018 | Uchida          | USA         | CS |   |   |   |   |   |   |   |   |   | ✓ <sup>11</sup> |  | 124 | OCT                                           | Cirrus 4000 HD-OCT                                                                                                                                                              |
| 14 |      |                 |             |    |   |   |   |   |   |   |   |   |   |                 |  |     |                                               |                                                                                                                                                                                 |
| 15 | 2019 | Almeida         | Brazil      | CS |   | ✓ | ✓ | ✓ | ✓ | ✓ |   |   |   |                 |  | 47  | SS-OCT                                        | SS-OCT (DRI OCT Triton)                                                                                                                                                         |
| 16 |      |                 |             |    |   |   |   |   |   |   |   |   |   |                 |  |     |                                               |                                                                                                                                                                                 |
| 17 | 2019 | Cipollini       | Italy       | CS |   |   | ✓ | ✓ | ✓ |   |   |   |   |                 |  | 42  | SD-OCT                                        | SD-OCT RTVue                                                                                                                                                                    |
| 18 |      |                 |             |    |   |   |   |   |   |   |   |   |   |                 |  |     |                                               |                                                                                                                                                                                 |
| 19 | 2019 | Haan            | Netherlands | CS |   |   | ✓ | ✓ |   | ✓ |   |   |   | ✓ <sup>12</sup> |  | 142 | SD-OCT                                        | Heidelberg Spectralis spectral domain OCT                                                                                                                                       |
| 20 |      |                 |             |    |   |   |   |   |   |   |   |   |   |                 |  |     |                                               |                                                                                                                                                                                 |
| 21 |      |                 |             |    |   |   |   |   |   |   |   |   |   |                 |  |     |                                               |                                                                                                                                                                                 |
| 22 | 2019 | Haan            | Netherlands | CS |   |   |   |   |   | ✓ | ✓ | ✓ |   |                 |  | 86  | 1. Fundus photography<br>2. SD-OCT<br>3. OCTA | 1. Topcon TRC 50DX type IA<br>2. Enhanced Depth Imaging OCT (EDI-OCT) using Heidelberg Spectralis spectral domain-OCT<br>3. Zeiss Model 5000 spectral domain-OCT with Angioplex |
| 23 |      |                 |             |    |   |   |   |   |   |   |   |   |   |                 |  |     |                                               |                                                                                                                                                                                 |
| 24 |      |                 |             |    |   |   |   |   |   |   |   |   |   |                 |  |     |                                               |                                                                                                                                                                                 |
| 25 |      |                 |             |    |   |   |   |   |   |   |   |   |   |                 |  |     |                                               |                                                                                                                                                                                 |
| 26 |      |                 |             |    |   |   |   |   |   |   |   |   |   |                 |  |     |                                               |                                                                                                                                                                                 |
| 27 |      |                 |             |    |   |   |   |   |   |   |   |   |   |                 |  |     |                                               |                                                                                                                                                                                 |
| 28 |      |                 |             |    |   |   |   |   |   |   |   |   |   |                 |  |     |                                               |                                                                                                                                                                                 |
| 29 |      |                 |             |    |   |   |   |   |   |   |   |   |   |                 |  |     |                                               |                                                                                                                                                                                 |
| 30 |      |                 |             |    |   |   |   |   |   |   |   |   |   |                 |  |     |                                               |                                                                                                                                                                                 |
| 31 |      |                 |             |    |   |   |   |   |   |   |   |   |   |                 |  |     |                                               |                                                                                                                                                                                 |
| 32 |      |                 |             |    |   |   |   |   |   |   |   |   |   |                 |  |     |                                               |                                                                                                                                                                                 |
| 33 | 2019 | Kim             | South Korea | CS | ✓ |   |   | ✓ | ✓ |   |   |   |   |                 |  | 47  | OCT                                           | Cirrus HD-OCT software version 6.0.0.599                                                                                                                                        |
| 34 |      |                 |             |    |   |   |   |   |   |   |   |   |   |                 |  |     |                                               |                                                                                                                                                                                 |
| 35 |      |                 |             |    |   |   |   |   |   |   |   |   |   |                 |  |     |                                               |                                                                                                                                                                                 |
| 36 | 2019 | Salobrar-Garcia | Spain       | CS |   |   | ✓ | ✓ |   | ✓ |   |   |   | ✓ <sup>13</sup> |  | 90  | OCT                                           | OCT Model 3D OCT-1000 and OCT Spectralis                                                                                                                                        |
| 37 |      |                 |             |    |   |   |   |   |   |   |   |   |   |                 |  |     |                                               |                                                                                                                                                                                 |
| 38 |      |                 |             |    |   |   |   |   |   |   |   |   |   |                 |  |     |                                               |                                                                                                                                                                                 |
| 39 | 2019 | Sung            | Korea       | CS |   |   | ✓ |   | ✓ | ✓ |   |   |   |                 |  | 127 | SD-OCT                                        | Cirrus SD-OCT                                                                                                                                                                   |
| 40 | 2019 | Tao             | China       | CS |   |   | ✓ | ✓ |   |   |   |   |   |                 |  | 191 | OCT                                           | Optovue AngioVue                                                                                                                                                                |
| 41 |      |                 |             |    |   |   |   |   |   |   |   |   |   |                 |  |     |                                               |                                                                                                                                                                                 |

|    |      |                |       |    |   |  |   |   |   |                 |  |   |   |                 |  |     |                              |                                                                                                     |
|----|------|----------------|-------|----|---|--|---|---|---|-----------------|--|---|---|-----------------|--|-----|------------------------------|-----------------------------------------------------------------------------------------------------|
| 1  | 2019 | Yoon           | USA   | CS | ✓ |  |   |   | ✓ |                 |  | ✓ | ✓ | ✓ <sup>14</sup> |  | 209 | 1. OCT<br>A<br>2. SD-<br>OCT | 1. Zeiss Cirrus HD-5000<br>SD-OCT with AngioPlex OCTA<br>2. Cirrus HD-OCT 5000 device               |
| 2  |      |                |       |    |   |  |   |   |   |                 |  |   |   |                 |  |     |                              |                                                                                                     |
| 3  |      |                |       |    |   |  |   |   |   |                 |  |   |   |                 |  |     |                              |                                                                                                     |
| 4  |      |                |       |    |   |  |   |   |   |                 |  |   |   |                 |  |     |                              |                                                                                                     |
| 5  |      |                |       |    |   |  |   |   |   |                 |  |   |   |                 |  |     |                              |                                                                                                     |
| 6  |      |                |       |    |   |  |   |   |   |                 |  |   |   |                 |  |     |                              |                                                                                                     |
| 7  | 2019 | Zhang          | USA   | CC |   |  | ✓ | ✓ |   | ✓               |  | ✓ | ✓ | ✓ <sup>15</sup> |  | 32  | 1. OCT<br>2. OCT<br>A        | RTVue-XR OCT Avanti System with split-spectrum amplitude-decorrelation angiography (SSADA) software |
| 8  |      |                |       |    |   |  |   |   |   |                 |  |   |   |                 |  |     |                              |                                                                                                     |
| 9  |      |                |       |    |   |  |   |   |   |                 |  |   |   |                 |  |     |                              |                                                                                                     |
| 10 |      |                |       |    |   |  |   |   |   |                 |  |   |   |                 |  |     |                              |                                                                                                     |
| 11 |      |                |       |    |   |  |   |   |   |                 |  |   |   |                 |  |     |                              |                                                                                                     |
| 12 |      |                |       |    |   |  |   |   |   |                 |  |   |   |                 |  |     |                              |                                                                                                     |
| 13 |      |                |       |    |   |  |   |   |   |                 |  |   |   |                 |  |     |                              |                                                                                                     |
| 14 |      |                |       |    |   |  |   |   |   |                 |  |   |   |                 |  |     |                              |                                                                                                     |
| 15 | 2020 | Ashima<br>tey  | USA   | CS |   |  |   |   |   |                 |  |   |   | ✓ <sup>16</sup> |  | 111 | OCTA                         | Spectral Domain OCTA: Cirrus HD-OCTA                                                                |
| 16 |      |                |       |    |   |  |   |   |   |                 |  |   |   |                 |  |     |                              |                                                                                                     |
| 17 |      |                |       |    |   |  |   |   |   |                 |  |   |   |                 |  |     |                              |                                                                                                     |
| 18 | 2020 | Criscuo<br>lo  | Italy | CS | ✓ |  |   | ✓ |   |                 |  | ✓ | ✓ |                 |  | 83  | SD-OCT<br>and<br>OCTA        | 1. SD-OCT<br>2. OCTA (XR Avanti AngioVue OCTA)                                                      |
| 19 |      |                |       |    |   |  |   |   |   |                 |  |   |   |                 |  |     |                              |                                                                                                     |
| 20 |      |                |       |    |   |  |   |   |   |                 |  |   |   |                 |  |     |                              |                                                                                                     |
| 21 |      |                |       |    |   |  |   |   |   |                 |  |   |   |                 |  |     |                              |                                                                                                     |
| 22 | 2020 | Leyland        | UK    | CS |   |  |   |   |   | ✓ <sup>17</sup> |  |   |   |                 |  | 146 | SD-OCT                       | High-resolution SD-OCT (Heidelberg HRA/Spectralis)                                                  |
| 23 |      |                |       |    |   |  |   |   |   |                 |  |   |   |                 |  |     |                              |                                                                                                     |
| 24 |      |                |       |    |   |  |   |   |   |                 |  |   |   |                 |  |     |                              |                                                                                                     |
| 25 | 2020 | Mamma<br>dova  | USA   | CS | ✓ |  |   |   |   |                 |  |   |   |                 |  | 20  | SD-OCT                       | High-resolution spectral-domain OCT imaging (Zeiss Cirrus 5000 HD-OCT)                              |
| 26 |      |                |       |    |   |  |   |   |   |                 |  |   |   |                 |  |     |                              |                                                                                                     |
| 27 |      |                |       |    |   |  |   |   |   |                 |  |   |   |                 |  |     |                              |                                                                                                     |
| 28 |      |                |       |    |   |  |   |   |   |                 |  |   |   |                 |  |     |                              |                                                                                                     |
| 29 |      |                |       |    |   |  |   |   |   |                 |  |   |   |                 |  |     |                              |                                                                                                     |
| 30 | 2020 | Santang<br>elo | Italy | CS |   |  | ✓ |   |   |                 |  |   |   | ✓ <sup>18</sup> |  | 137 | OCT                          | Heidelberg Spectralis OCT                                                                           |
| 31 |      |                |       |    |   |  |   |   |   |                 |  |   |   |                 |  |     |                              |                                                                                                     |
| 32 |      |                |       |    |   |  |   |   |   |                 |  |   |   |                 |  |     |                              |                                                                                                     |

<sup>1</sup>Central subfield (CSF) retinal thickness; <sup>2</sup>Focal loss volume and global loss volume; <sup>3</sup>Blood column diameter, centreline blood speed, retinal blood flow rate; <sup>4</sup>Time-resolved autofluorescence of the retina by FLIO; <sup>5</sup>Average RNFL + GC-IPL = GCL++; <sup>6</sup>Papillomacular bundle thickness, Inner plexiform layer (IPL) and outer nuclear layer (ONL) thickness; <sup>7</sup>Outer retinal flow rate and choroidal flow rate; <sup>8</sup>Superficial vascular plexus (SVP), Deep vascular plexus (DVP), Total retinal vascular network (RVN); <sup>9</sup>Flow density in the Optic Nerve Head (ONH), Superficial retinal OCTA of the macula; <sup>10</sup>Inner nuclear layer (INL), ONL, outer plexiform layer (OPL), Retinal photoreceptor (PR); <sup>11</sup>Retinal thickness/volume, mean foveal thickness and juxtafoveal thickness; <sup>12</sup>IPL thickness; inner retinal layer thickness; total retinal thickness; <sup>13</sup>IPL, INL, OPL; retinal pigment epithelium (RPE) thickness; <sup>14</sup>Perfusion density (PD); central subfield thickness (CST); <sup>15</sup>Radial peripapillary capillary (RPC) layer, Superficial vascular complex (SVC), Superficial capillary plexus (SCP), Deep capillary plexus (DCP), Adjusted Flow Index (AFI), Micropapillary VD of RPC; <sup>16</sup>Retinal vessel skeleton density (VSD) – measure of retinal capillary perfusion; <sup>17</sup>Macular thickness and volume of RNFL, Ganglion cell layer (GCL) and IPL; <sup>18</sup>Macular volume of GCL, IPL and INL;

**Table 2.** Study characteristics of cognitive assessment and score

| Year | Author          | Mean age of individuals with diagnosed AD <sup>1</sup> | Mean age range of controls | No. of cognitively impaired subjects <sup>2</sup> |                   | Cognition measure | Mean cognitive score                          |                                               |            |
|------|-----------------|--------------------------------------------------------|----------------------------|---------------------------------------------------|-------------------|-------------------|-----------------------------------------------|-----------------------------------------------|------------|
|      |                 |                                                        |                            | MCI                                               | AD                |                   | Controls                                      | MCI                                           | AD         |
| 2001 | Parisi          | 70.4                                                   | -                          | -                                                 | 17                | MMSE              | 23                                            | -                                             | 16.4       |
| 2006 | Iseri           | 70.1                                                   | 65.1                       | -                                                 | 14                | MMSE              | 29.4                                          | -                                             | 18.5       |
| 2011 | Kesler          | 73.7                                                   | 70.9                       | 24                                                | 30                | MMSE              | -                                             | 28.1                                          | 23.6       |
| 2013 | Kirbas          | 69.3                                                   | 68.9                       | -                                                 | 40                | MMSE              | 28.7                                          | -                                             | 21.2       |
| 2013 | Moreno-Ramos    | 73.0                                                   | 70.2                       | -                                                 | 10 <sup>3,4</sup> | MMSE              | 29.2                                          | -                                             | 16.4       |
| 2013 | Shen            | -                                                      | 74.1                       | 18 <sup>5</sup>                                   | -                 | MMSE              | At 25 months:<br>27.7                         | At 25 months:<br>24.6                         | -          |
| 2014 | Ascaso          | 72.1                                                   | 72.9                       | 21                                                | 18                | MMSE              | 28.8                                          | -                                             | 19.3       |
| 2014 | Gharbiya        | 73.1                                                   | 70.3                       | -                                                 | 21                | MMSE              | 28.2                                          | -                                             | 22.2       |
| 2014 | Polo            | 74.2                                                   | 74.0                       | -                                                 | 70                | MMSE              | -                                             | -                                             | 16.0       |
| 2015 | Bambo           | 74.0                                                   | 76.4                       | -                                                 | 56                | MMSE              | -                                             | -                                             | 16.6       |
| 2015 | Bambo           | 74.0                                                   | 76.4                       | -                                                 | 56                | MMSE              | -                                             | -                                             | 16.6       |
| 2015 | Bayhan          | 75.8                                                   | 74.9                       | -                                                 | 31                | MMSE              | 29.3                                          | -                                             | 17.4       |
| 2015 | Feke            | 74.3                                                   | 69.1                       | 21                                                | 10                | CDR               | 0.0                                           | 0.5                                           | 1.0 or 2.0 |
| 2015 | Gao             | 74.7                                                   | 72.1                       | 26                                                | 25                | MMSE              | 28.6                                          | 25.8                                          | 19.2       |
| 2015 | Gunes           | 75.0                                                   | 74.2                       | -                                                 | 40                | MMSE              | -                                             | -                                             | 21.9       |
| 2015 | Jentsch         | 77.2                                                   | -                          | -                                                 | 16                | MMSE              | -                                             | -                                             | 24.0       |
| 2015 | Oktem           | 75.4                                                   | 70.2                       | 35                                                | 35                | MMSE              | 29.0                                          | 28.0                                          | 18.0       |
| 2015 | Salobrar-Garcia | 79.3                                                   | 72.3                       | -                                                 | 23                | MMSE              | 28.2                                          | -                                             | 23.3       |
| 2015 | Shi             | -                                                      | 74.1                       | 18 <sup>5</sup>                                   | -                 | MMSE              | At baseline:<br>28.0<br>At 25 months:<br>28.0 | At baseline:<br>27.0<br>At 25 months:<br>24.0 | -          |
| 2016 | Choi            | 76.8                                                   | 73.8                       | 26                                                | 42                | MMSE              | -                                             | 23.1                                          | 14.1       |

|    |      |                 |       |      |     |                   |      |               |      |                   |
|----|------|-----------------|-------|------|-----|-------------------|------|---------------|------|-------------------|
| 1  | 2016 | Cunha           | 74.8  | 72.3 | -   | 24                | MMSE | 29.1          | -    | 17.0              |
| 2  | 2016 | Garcia-Martin   | 75.3  | 74.8 | -   | 150               | MMSE | 29.8          | -    | 18.4              |
| 3  | 2016 | Knoll           | -     | 74.0 | 17  | -                 | MMSE | 29.0          | 27.0 | -                 |
| 4  | 2016 | Pillai          | 65.8  | 65.1 | 21  | 21 <sup>4,6</sup> | MoCA | 26.6          | 21.2 | 16.0              |
| 5  | 2016 | Trebbastoni     | 72.0  | 71.7 | -   | 36                | MMSE | At baseline:  | -    | At baseline:      |
| 6  |      |                 |       |      |     |                   |      | 28.6          |      | 22.7              |
| 7  |      |                 |       |      |     |                   |      | At 12 months: |      | At 12 months:     |
| 8  |      |                 |       |      |     |                   |      | 28.5          |      | 17.9              |
| 9  | 2017 | Ferrari         | 71.26 | 68.3 | 29  | 37 <sup>7</sup>   | MMSE | -             | 26.6 | 16.6              |
| 10 | 2017 | Mendez-Gomez    | -     | N/A  | -   | -                 | MMSE | 27.8          | -    | -                 |
| 11 | 2018 | Bulut           | 74.2  | 72.6 | -   | 26                | MMSE | 26.8          | -    | 16.9              |
| 12 | 2018 | Jiang           | 73.3  | 67.6 | 19  | 12                | MMSE | 29.5          | 25.7 | 19.9              |
| 13 | 2018 | Lahme           | 68.0  | 66.1 | -   | 36                | MMSE | -             | -    | 22.3              |
| 14 | 2018 | Shao            | 74.0  | 68.0 | 24  | 25                | MMSE | 29.0          | 28.0 | 22.0              |
| 15 | 2018 | Uchida          | 65.3  | 65.1 | 22  | 24 <sup>4,6</sup> | MoCA | 26.6          | 20.9 | 14.7              |
| 16 | 2019 | Almeida         | -     | 64.6 | 23  | -                 | MMSE | -             | 27.9 | -                 |
| 17 | 2019 | Cipollini       | 74.0  | 70.0 | -   | 25                | MMSE | 29.2          | -    | 24.2              |
| 18 | 2019 | Haan            | 65.0  | 67.9 | -   | 57                | MMSE | 29.0          | -    | 22.0              |
| 19 | 2019 | Haan            | 65.4  | 60.6 | -   | 48                | MMSE | 29.0          | -    | 23.0              |
| 20 | 2019 | Kim             | 74.2  | 73.6 | 14  | 16                | MMSE | -             | 24.2 | 12.1              |
| 21 | 2019 | Salobrar-Garcia | -     | -    | -   | 50                | MMSE | 28.6          |      | 19.9              |
| 22 | 2019 | Sung            | 65.3  | 64.7 | -   | 74 <sup>4</sup>   | MMSE | -             | -    | 25.7 <sup>9</sup> |
| 23 | 2019 | Tao             | 71.4  | 68.9 | 51  | 73                | MMSE | 28.7          | 28.3 | 19.7              |
| 24 | 2019 | Yoon            | 72.8  | 69.2 | 37  | 39                | MMSE | 29.2          | 22.6 | 20.1              |
| 25 | 2019 | Zhang           | 73.0  | 73.6 | 13  | 3                 | MoCA | 27.1          |      | 20.3              |
| 26 | 2020 | Ashimatey       | -     | 68.4 | -   | 15 <sup>8</sup>   | MoCA | 23.0          | -    | 20.0              |
| 27 | 2020 | Criscuolo       | -     | 73.1 | 54  | -                 | MMSE | 28.0          | 26.5 | -                 |
| 28 | 2020 | Leyland         | -     | 64.8 | -   | 112 <sup>4</sup>  | MoCA | 28.7          | -    | 27.9              |
| 29 | 2020 | Mammadova       | -     | N/A  | N/A | N/A               | MMSE | 29.2          | -    | -                 |
| 30 | 2020 | Santangelo      | 70.9  | 69.4 | 37  | 43                | MMSE | -             | 24.9 | 19.0              |

<sup>1</sup> Mean age of AD group reported only; <sup>2</sup> Other groups studied listed in footnotes; <sup>3</sup> Lewy Body Dementia; <sup>4</sup> Parkinson's Dementia; <sup>5</sup> Converted (converted from normal cognition to MCI or MCI to dementia); <sup>6</sup> non-AD dementia; <sup>7</sup> Frontotemporal Dementia; <sup>8</sup> Cognitively abnormal; <sup>9</sup> Dementia

**Table 3.** Summary of QUADAS score of the 47 include studies.

| Year | Author          | RS <sup>1</sup> | CSC <sup>2</sup> | ARS <sup>3</sup> | DPB <sup>4</sup> | PVB <sup>5</sup> | DVB <sup>6</sup> | IB <sup>7</sup> | ITE <sup>8</sup> | RSE <sup>9</sup> | ITRB <sup>10</sup> | RSRB <sup>11</sup> | CRB <sup>12</sup> | UTRR <sup>13</sup> | WE <sup>14</sup> | Total |
|------|-----------------|-----------------|------------------|------------------|------------------|------------------|------------------|-----------------|------------------|------------------|--------------------|--------------------|-------------------|--------------------|------------------|-------|
| 2001 | Parisi          | N               | N                | Y                | U                | U                | U                | Y               | Y                | N                | U                  | U                  | Y                 | Y                  | N                | 5/14  |
| 2006 | Iseri           | N               | Y                | Y                | Y                | Y                | Y                | Y               | Y                | N                | U                  | U                  | Y                 | Y                  | Y                | 10/14 |
| 2011 | Kesler          | N               | Y                | Y                | U                | Y                | Y                | U               | U                | N                | Y                  | Y                  | Y                 | Y                  | Y                | 9/14  |
| 2013 | Kirbas          | N               | Y                | Y                | U                | Y                | Y                | Y               | N                | N                | U                  | U                  | Y                 | Y                  | Y                | 8/14  |
| 2013 | Moreno-Ramos    | N               | Y                | Y                | Y                | Y                | Y                | Y               | Y                | N                | U                  | U                  | Y                 | Y                  | Y                | 10/14 |
| 2013 | Shen            | N               | Y                | Y                | Y                | Y                | Y                | Y               | Y                | Y                | U                  | U                  | Y                 | Y                  | Y                | 11/14 |
| 2014 | Ascaso          | N               | Y                | Y                | Y                | Y                | Y                | Y               | Y                | Y                | N                  | Y                  | Y                 | Y                  | N                | 11/14 |
| 2014 | Gharbiya        | N               | Y                | Y                | Y                | Y                | Y                | Y               | Y                | N                | Y                  | Y                  | Y                 | Y                  | Y                | 13/14 |
| 2014 | Polo            | N               | Y                | Y                | Y                | Y                | Y                | Y               | Y                | Y                | Y                  | Y                  | Y                 | Y                  | Y                | 13/14 |
| 2015 | Bambo           | N               | Y                | Y                | U                | Y                | Y                | Y               | Y                | Y                | U                  | U                  | Y                 | Y                  | Y                | 10/14 |
| 2015 | Bambo           | N               | Y                | Y                | Y                | U                | Y                | Y               | Y                | Y                | U                  | U                  | Y                 | Y                  | Y                | 10/14 |
| 2015 | Bayhan          | N               | Y                | Y                | Y                | Y                | Y                | Y               | Y                | Y                | Y                  | Y                  | Y                 | Y                  | Y                | 13/14 |
| 2015 | Feke            | N               | Y                | Y                | U                | Y                | Y                | Y               | Y                | N                | U                  | U                  | Y                 | Y                  | Y                | 10/14 |
| 2015 | Gao             | N               | Y                | Y                | Y                | Y                | Y                | Y               | Y                | Y                | Y                  | Y                  | Y                 | Y                  | Y                | 13/14 |
| 2015 | Gunes           | N               | Y                | Y                | Y                | Y                | Y                | Y               | N                | N                | U                  | U                  | Y                 | Y                  | Y                | 9/14  |
| 2015 | Jentsch         | N               | Y                | Y                | U                | U                | Y                | Y               | Y                | Y                | U                  | U                  | Y                 | Y                  | Y                | 9/14  |
| 2015 | Oktem           | N               | N                | Y                | Y                | Y                | Y                | Y               | N                | Y                | U                  | U                  | Y                 | Y                  | Y                | 9/14  |
| 2015 | Shi             | N               | Y                | Y                | Y                | Y                | Y                | Y               | Y                | Y                | U                  | U                  | Y                 | Y                  | Y                | 11/14 |
| 2015 | Solabrar-Garcia | N               | Y                | Y                | U                | Y                | Y                | Y               | Y                | N                | U                  | U                  | Y                 | Y                  | Y                | 9/14  |
| 2016 | Choi            | N               | Y                | Y                | Y                | Y                | Y                | Y               | Y                | Y                | U                  | U                  | Y                 | Y                  | Y                | 12/14 |
| 2016 | Cunha           | N               | Y                | Y                | Y                | Y                | Y                | Y               | Y                | Y                | U                  | U                  | Y                 | Y                  | Y                | 11/14 |
| 2016 | Garcia-Martin   | N               | Y                | Y                | Y                | Y                | Y                | Y               | Y                | Y                | Y                  | Y                  | Y                 | Y                  | Y                | 13/14 |
| 2016 | Knoll           | N               | Y                | Y                | Y                | Y                | Y                | Y               | Y                | Y                | N                  | Y                  | Y                 | Y                  | Y                | 12/14 |
| 2016 | Pillai          | N               | Y                | Y                | Y                | Y                | Y                | Y               | Y                | Y                | U                  | U                  | Y                 | Y                  | Y                | 11/14 |
| 2016 | Trebbastoni     | N               | Y                | Y                | Y                | Y                | Y                | Y               | Y                | Y                | U                  | U                  | Y                 | Y                  | Y                | 11/14 |
| 2017 | Ferrari         | N               | Y                | Y                | U                | Y                | Y                | Y               | Y                | N                | U                  | U                  | Y                 | Y                  | Y                | 9/14  |
| 2017 | Mendez-Gomez    | N               | N                | Y                | Y                | Y                | Y                | Y               | Y                | Y                | U                  | U                  | Y                 | Y                  | Y                | 10/14 |
| 2018 | Bulut           | N               | Y                | Y                | Y                | Y                | Y                | Y               | Y                | Y                | U                  | U                  | Y                 | Y                  | Y                | 11/14 |
| 2018 | Jiang           | N               | Y                | Y                | U                | Y                | Y                | Y               | Y                | N                | U                  | U                  | U                 | N                  | N                | 6/14  |
| 2018 | Lahme           | N               | Y                | Y                | U                | Y                | Y                | Y               | Y                | N                | U                  | U                  | Y                 | Y                  | Y                | 9/14  |
| 2018 | Shao            | N               | Y                | Y                | Y                | Y                | Y                | Y               | Y                | Y                | Y                  | U                  | U                 | Y                  | Y                | 11/14 |
| 2018 | Uchida          | N               | Y                | Y                | Y                | Y                | Y                | Y               | Y                | Y                | U                  | U                  | Y                 | Y                  | Y                | 11/14 |
| 2019 | Almeida         | N               | Y                | Y                | Y                | Y                | Y                | Y               | Y                | Y                | U                  | Y                  | Y                 | Y                  | Y                | 12/14 |
| 2019 | Cipollini       | N               | Y                | Y                | U                | Y                | Y                | Y               | Y                | Y                | U                  | U                  | Y                 | Y                  | Y                | 10/14 |
| 2019 | Haan            | N               | Y                | Y                | Y                | Y                | Y                | Y               | Y                | Y                | Y                  | Y                  | Y                 | Y                  | Y                | 13/14 |
| 2019 | Haan            | N               | Y                | Y                | Y                | Y                | Y                | Y               | Y                | Y                | Y                  | Y                  | Y                 | Y                  | Y                | 13/14 |
| 2019 | Kim             | N               | Y                | Y                | Y                | Y                | Y                | Y               | Y                | Y                | Y                  | Y                  | Y                 | Y                  | Y                | 13/14 |
| 2019 | Solabrar-Garcia | N               | Y                | Y                | Y                | Y                | Y                | Y               | Y                | Y                | U                  | U                  | Y                 | Y                  | Y                | 11/14 |

|      |            |   |   |   |   |   |   |   |   |   |   |   |   |   |   |       |
|------|------------|---|---|---|---|---|---|---|---|---|---|---|---|---|---|-------|
| 2019 | Sung       | N | Y | Y | Y | Y | Y | Y | Y | Y | U | U | Y | Y | Y | 11/14 |
| 2019 | Tao        | N | Y | Y | N | Y | Y | Y | Y | N | U | U | Y | Y | Y | 9/14  |
| 2019 | Yoon       | N | Y | Y | Y | Y | Y | Y | Y | Y | U | U | Y | Y | Y | 11/14 |
| 2019 | Zhang      | N | Y | Y | Y | Y | Y | Y | Y | Y | Y | Y | Y | Y | Y | 13/14 |
| 2020 | Ashimatey  | N | Y | Y | U | Y | Y | Y | Y | Y | Y | Y | Y | Y | Y | 12/14 |
| 2020 | Criscuolo  | N | Y | Y | U | Y | Y | Y | Y | Y | U | U | Y | Y | Y | 10/14 |
| 2020 | Leyland    | N | Y | Y | Y | Y | Y | Y | Y | Y | Y | Y | Y | Y | Y | 13/14 |
| 2020 | Mammadova  | N | Y | Y | Y | Y | Y | Y | Y | Y | U | U | Y | Y | Y | 11/14 |
| 2020 | Santangelo | N | Y | Y | U | Y | Y | Y | Y | N | U | U | Y | Y | Y | 9/14  |

Y: Yes (green); N: No (red); U: unknown (yellow)

<sup>1</sup>Representative spectrum, <sup>2</sup>Clear selection criteria, <sup>3</sup>Accurate reference standard, <sup>4</sup>Disease progression bias, <sup>5</sup>Partial verification bias, <sup>6</sup>Differential verification bias, <sup>7</sup>Incorporation bias, <sup>8</sup>Index test execution well described, <sup>9</sup>Reference standard execution well described, <sup>10</sup>Index test review bias, <sup>11</sup>Reference standard review bias, <sup>12</sup>Clinical review bias, <sup>13</sup>Uninterpretable results reported, <sup>14</sup>Withdrawals explained

For peer review only

**Table 3.** Associations between diagnosed dementia status (e.g., AD) and retinal function

| Year | Author          | Method                                                     | Areas of retina measured |       |       |     |                             |    |    |    |     |       |   |                                  |
|------|-----------------|------------------------------------------------------------|--------------------------|-------|-------|-----|-----------------------------|----|----|----|-----|-------|---|----------------------------------|
|      |                 |                                                            | RNFL                     | mRNFL | pRNFL | GCC | GC-IPL                      | MT | CT | VD | FAZ | Other |   |                                  |
| 2001 | Parisi          | OCT                                                        | x                        | -     | -     | -   | -                           | -  | -  | -  | -   | -     | - | -                                |
| 2006 | Iseri           | OCT                                                        | x                        | -     | -     | -   | -                           | -  | ✓  | -  | -   | -     | - | x <sup>1</sup>                   |
| 2011 | Kesler          | OCT                                                        | x                        | -     | -     | -   | -                           | -  | -  | -  | -   | -     | - | -                                |
| 2013 | Kirbas          | SD-OCT                                                     | x                        | -     | x     | -   | -                           | -  | -  | -  | -   | -     | - | -                                |
| 2013 | Moreno-Ramos    | OCT                                                        | ✓                        | -     | -     | -   | -                           | -  | -  | -  | -   | -     | - | -                                |
| 2013 | Shen            | OCT                                                        | ✓                        | -     | -     | -   | -                           | -  | -  | -  | -   | -     | - | -                                |
| 2014 | Ascaso          | OCT                                                        | ✓                        | -     | -     | -   | -                           | -  | x  | -  | -   | -     | - | -                                |
| 2014 | Gharbiya        | SD-OCT                                                     | -                        | -     | x     | -   | -                           | -  | -  | x  | -   | -     | - | x <sup>2</sup>                   |
| 2014 | Polo            | OCT                                                        | x                        | -     | -     | -   | -                           | -  | -  | -  | -   | -     | - | -                                |
| 2015 | Bambo           | OCT                                                        | -                        | -     | ?     | -   | -                           | -  | -  | -  | -   | -     | - | x <sup>3</sup>                   |
| 2015 | Bayhan          | SD-OCT                                                     | -                        | -     | -     | ✓   | -                           | -  | -  | x  | -   | -     | - | -                                |
| 2015 | Feke            | 1. Laser Doppler retinal blood flow measurements<br>2. OCT | -                        | -     | -     | -   | -                           | -  | -  | -  | -   | -     | - | ✓ <sup>4</sup>                   |
| 2015 | Gao             | OCT                                                        | -                        | -     | x     | -   | -                           | -  | -  | -  | -   | -     | - | -                                |
| 2015 | Gunes           | SD-OCT                                                     | -                        | -     | x     | -   | -                           | -  | -  | -  | -   | -     | - | -                                |
| 2015 | Jentsch         | OCT and FLIO                                               | -                        | -     | x     | -   | -                           | -  | -  | -  | -   | -     | - | ? <sup>5</sup>                   |
| 2015 | Oktem           | OCT                                                        | ✓                        | -     | -     | -   | -                           | -  | -  | -  | -   | -     | - | -                                |
| 2015 | Salobrar-Garcia | OCT                                                        | -                        | ?     | x     | -   | -                           | -  | -  | -  | -   | -     | - | ✓ <sup>1,6</sup>                 |
| 2015 | Shi             | OCT                                                        | ✓                        | -     | -     | -   | -                           | -  | -  | -  | -   | -     | - | -                                |
| 2016 | Choi            | OCT                                                        | -                        | -     | x     | -   | ?                           | -  | ?  | -  | -   | -     | - | -                                |
| 2016 | Cunha           | OCT                                                        | -                        | ✓     | ✓     | ✓   | ✓                           | ✓  | ✓  | -  | -   | -     | - | ✓ <sup>7</sup>                   |
| 2016 | Garcia-Martin   | OCT                                                        | ✓                        | -     | -     | ✓   | -                           | -  | -  | -  | -   | -     | - | -                                |
| 2016 | Knoll           | SD-OCT                                                     | -                        | -     | ?     | -   | -                           | -  | -  | -  | -   | -     | - | -                                |
| 2016 | Pillai          | SD-OCT                                                     | x                        | -     | -     | -   | -                           | -  | -  | -  | -   | -     | - | -                                |
| 2016 | Trebbastoni     | SD-OCT                                                     | -                        | -     | ✓     | -   | -                           | -  | -  | -  | -   | -     | - | -                                |
| 2017 | Ferrari         | OCT                                                        | -                        | -     | x     | -   | AD<br>✓<br>MCI and FTD<br>x | -  | -  | -  | -   | -     | - | -                                |
| 2017 | Mendez-Gomez    | SD-OCT                                                     | -                        | -     | ?     | -   | -                           | -  | -  | -  | -   | -     | - | -                                |
| 2018 | Bulut           | OCTA                                                       | -                        | -     | -     | -   | -                           | -  | -  | ✓  | ✓   | ✓     | - | x <sup>8</sup><br>x <sup>9</sup> |
| 2018 | Jiang           | 1. OCTA                                                    | -                        | -     | -     | -   | -                           | -  | -  | -  | -   | -     | - | ? <sup>10</sup>                  |

28

|    |      |                 |                      |   |   |   |   |   |   |   |   |   |                 |
|----|------|-----------------|----------------------|---|---|---|---|---|---|---|---|---|-----------------|
|    |      | 2. OCT          |                      |   |   |   |   |   |   |   |   |   |                 |
| 1  | 2018 | Lahme           | OCTA                 | - | - | - | - | - | - | - | - | - | x <sup>11</sup> |
| 2  | 2018 | Shao            | SD-OCT               | ✓ | - | - | - | ✓ | - | - | - | - |                 |
| 3  | 2018 | Uchida          | OCT                  | - | - | - | - | - | - | - | - | - | ✓ <sup>12</sup> |
| 4  | 2019 | Almeida         | SS-OCT               | - | x | ✓ | ✓ | ✓ | ? | - | - | - |                 |
| 5  | 2019 | Cipollini       | SD-OCT               | - | - | x | x | - | x | - | - | - |                 |
| 6  | 2019 | Haan            | SD-OCT               | - | - | x | - | - | x | - | - | - |                 |
| 7  | 2019 | Haan            | 1. SD-OCT<br>2. OCTA | - | - | - | - | - | - | x | x | x |                 |
| 8  | 2019 | Kim             | OCT                  | ? | - | - | - | ? | ✓ | - | - | - |                 |
| 9  | 2019 | Salobrar-Garcia | OCT                  | - | - | ✓ | - | - | ✓ | - | - | - |                 |
| 10 | 2019 | Sung            | SD-OCT               | - | - | x | - | ✓ | ✓ | - | - | - | x <sup>13</sup> |
| 11 | 2019 | Tao             | OCT                  | - | - | x | x | - | - | - | - | - |                 |
| 12 | 2019 | Yoon            | 1. OCTA<br>2. SD-OCT | ✓ | - | - | - | ✓ | - | - | ? | x | x <sup>14</sup> |
| 13 |      |                 |                      |   |   |   |   |   |   |   |   |   | ?               |
| 14 | 2019 | Zhang           | 1. OCT<br>2. OCTA    | - | - | - | - | - | - | - | ? | - | ?               |
| 15 |      |                 |                      |   |   |   |   |   |   |   |   |   | x <sup>17</sup> |
| 16 | 2020 | Ashimatey       | OCTA                 | - | - | - | - | - | - | - | ✓ | - |                 |
| 17 | 2020 | Criscuolo       | 1. SD-OCT<br>2. OCTA | x | - | - | x | - | - | - | - | - |                 |
| 18 | 2020 | Leyland         | SD-OCT               | - | - | - | - | - | ✓ | - | - | - |                 |
| 19 | 2020 | Mammadova       | SD-OCT               | ✓ | - | - | - | - | - | - | - | - |                 |
| 20 | 2020 | Santangelo      | OCT                  | x | - | - | - | - | ✓ | - | - | - |                 |

<sup>1</sup> Foveal thickness; <sup>2</sup> Retinal CSF thickness; <sup>3</sup> Retinal haemoglobin levels; <sup>4</sup> Retinal blood flow; <sup>5</sup> T2,  $\alpha$ 2 and Q2 in ch2; <sup>6</sup> Macular volume; <sup>7</sup> GCL++; <sup>8</sup> Choroidal flow rate; <sup>9</sup> Outer retinal flow rate; <sup>10</sup> Superficial vascular plexus (SVP), Deep vascular plexus (DVP) and Total retinal vascular network (RVN); <sup>11</sup> Flow density; <sup>12</sup> Retinal pigment epithelium (RPE); <sup>13</sup> Central foveal thickness (CFT); <sup>14</sup> Central subfield thickness (CST); <sup>15</sup> Perfusion Density (PD); <sup>16</sup> Vessel length density (VLD); <sup>17</sup> Adjusted flow index (AFI);

Key:

|   |                           |
|---|---------------------------|
| ✓ | Correlation identified    |
| x | No correlation identified |
| - | Not specified             |



## References

1. Bambo MP, Garcia-Martin E, Gutierrez-Ruiz F, et al. Analysis of optic disk color changes in Alzheimer's disease: a potential new biomarker. *Clin Neurol Neurosurg*. 2015;132:68-73. doi:10.1016/j.clineuro.2015.02.016
2. Yoon SP, Thompson AC, Polascik BW, Calixte C, Burke JR, Petrella JR, et al. Correlation of OCTA and Volumetric MRI in Mild Cognitive Impairment and Alzheimer's Disease. *Ophthalmic Surgery, Lasers & Imaging Retina* 2019 11;50(11):709-718.
3. Dementia Australia. Dementia statistics [Internet]. Australia: Dementia Australia; 2014 [updated 2020 Jan; cited 2020 Feb 23]. Available from: <https://www.dementia.org.au/statistics>
4. Dementia Australia. Early diagnosis of dementia [Internet]. Australia: Dementia Australia; 2014 [cited 2020 Feb 23]. Available from: <https://www.dementia.org.au/information/diagnosing-dementia/early-diagnosis-of-dementia>
5. Bulut M, Kurtuluş F, Gözkaya O, et al. Evaluation of optical coherence tomography angiographic findings in Alzheimer's type dementia. *Br J Ophthalmol* 2018;102:233–7. doi:10.1136/bjophthalmol-2017-310476s
6. Dementia Australia. Early warning signs [Internet]. Australia: Dementia Australia; 2015 [cited 2020 Feb 23]. Available from: <https://www.dementia.org.au/about-dementia/health-professionals/dementia-the-essentials/early-warning-signs>
7. Ong Y-T, Hilal S, Cheung CY, et al. Retinal neurodegeneration on optical coherence tomography and cerebral atrophy. *Neuroscience Letters* 2015;584:12–6. doi:10.1016/j.neulet.2014.10.010
8. Nestor SM, Rupsingh R, Borrie M, et al. Ventricular enlargement as a possible measure of Alzheimer's disease progression validated using the Alzheimer's disease neuroimaging initiative database. *Brain* 2008;131:2443–54. doi:10.1093/brain/awn146
9. Adhi M, Duker JS. Optical coherence tomography – current and future applications. *Current Opinion in Ophthalmology*. 2013 May;24(3):213-21.

10. Ito Y, Sasaki M, Takahashi H, et al. Quantitative Assessment of the Retina Using OCT and Associations with Cognitive Function. *Ophthalmology* Published Online First: 4 June 2019. doi:10.1016/j.ophtha.2019.05.021
11. Almeida ALM, Pires LA, Figueiredo EA, et al. Correlation between cognitive impairment and retinal neural loss assessed by swept-source optical coherence tomography in patients with mild cognitive impairment. *Alzheimer's & Dementia: Diagnosis, Assessment & Disease Monitoring* 2019;11:659–69. doi:10.1016/j.dadm.2019.08.006
12. Thomson KL, Yeo JM, Waddell B, Cameron JR, Pal S. A systematic review and meta-analysis of retinal nerve fiber layer change in dementia, using optical coherence tomography. *Alzheimer's & Dementia: Diagnosis, Assessment & Disease Monitoring*. 2015 Jun 1;1(2):136–43.
13. Wang M, Zhu Y, Shi Z, Li C, Shen Y. Meta-analysis of the relationship of peripheral retinal nerve fiber layer thickness to Alzheimer's disease and mild cognitive impairment. *Shanghai Archives of Psychiatry*. 2015 Oct;27(5):263.
14. Whiting P, Rutjes AW, Reitsma JB, et al. The development of QUADAS: a tool for the quality assessment of studies of diagnostic accuracy included in systematic reviews. *BMC Medical Research Methodology* 2003;3:25. doi:10.1186/1471-2288-3-25
15. Feke GT, Hyman BT, Stern RA, Pasquale LR. Retinal blood flow in mild cognitive impairment and Alzheimer's disease. *Alzheimers Dement (Amst)*. 2015 Apr 23;1(2):144–51.
16. Dysli C, Wolf S, Berezin MY, Sauer L, Hammer M, Zinkernagel MS. Fluorescence lifetime imaging ophthalmoscopy. *Prog Retin Eye Res*. 2017;60:120–4
17. Jentsch S, Schweitzer D, Schmidtke K-U, Peters S, Dawczynski J, Bär K-J, et al. Retinal fluorescence lifetime imaging ophthalmoscopy measures depend on the severity of Alzheimer's disease. *Acta Ophthalmologica*. 2015;93(4):e241–7.
18. Haan J, van de Kreeke JA, van Berckel BN, Barkhof F, Teunissen CE, Scheltens P, et al. Is retinal vasculature a biomarker in amyloid proven Alzheimer's disease? *Alzheimer's & Dementia: Diagnosis, Assessment & Disease Monitoring*. 2019 Dec 1;11:383–91.

19. Yoon SP, Grewal DS, Thompson AC, et al. Retinal Microvascular and Neurodegenerative Changes in Alzheimer's Disease and Mild Cognitive Impairment Compared with Control Participants. *Ophthalmol Retina*. 2019;3(6):489-499.
20. Mammadova N, Nepl TK, Denburg NL, West Greenlee MH. Reduced Retinal Thickness Predicts Age-Related Changes in Cognitive Function. *Frontiers in Aging Neuroscience*. 2020;12:81.
21. Criscuolo C, Cennamo G, Montorio D, Carotenuto A, Strianese A, Salvatore E, et al. Assessment of retinal vascular network in amnesic mild cognitive impairment by optical coherence tomography angiography. *PLoS ONE*. 2020;15(6):e0233975. Shi Z, Zhu Y, Wang M, Wu Y, Cao J, Li C, et al. The Utilization of Retinal Nerve Fiber Layer Thickness to Predict Cognitive Deterioration. *Journal of Alzheimer's Disease*. 2016;49(2):399–405.
22. Santangelo R, Huang S-C, Bernasconi MP, Falautano M, Comi G, Magnani G, et al. Neuro-Retina Might Reflect Alzheimer's Disease Stage. *J Alzheimers Dis*. 2020;77(4):1455–68.
23. Costa-Cunha L.V., Cunha L.P., Malta R.F., Monterio M.L. Comparison of Fourier-domain and time-domain optical coherence tomography in the detection of band atrophy of the optic nerve. *Am J Ophthalmol*. 2009;147:56–63.e2.
24. Song A, Johnson N, Ayala A, Thompson AC. Optical Coherence Tomography in Patients with Alzheimer's Disease: What Can It Tell Us? *Eye Brain*. 2021;13:1–20.
25. Cunha LP, Lopes LC, Costa-Cunha LVF, Costa CF, Pires LA, Almeida ALM, et al. Macular Thickness Measurements with Frequency Domain-OCT for Quantification of Retinal Neural Loss and its Correlation with Cognitive Impairment in Alzheimer's Disease. *PLOS ONE*. 2016;11(4):1–12.
26. Trebbastoni A, D'Antonio F, Bruscolini A, Marcelli M, Cecere M, Campanelli A, et al. Retinal nerve fibre layer thickness changes in Alzheimer's disease: Results from a 12-month prospective case series. *Neuroscience Letters*. 2016 Aug 26;629:165–70.
27. Salobar-García E, de Hoz R, Ramírez AI, López-Cuenca I, Rojas P, Vazirani R, et al. Changes in visual function and retinal structure in the progression of Alzheimer's disease. *PLOS ONE*. 2019;14(8):1–23.

- 1  
2  
3  
4  
5  
6  
7  
8  
9  
10  
11  
12  
13  
14  
15  
16  
17  
18  
19  
20  
21  
22  
23  
24  
25  
26  
27  
28  
29  
30  
31  
32  
33  
34  
35  
36  
37  
38  
39  
40  
41  
42  
43  
44  
45  
46  
47  
48  
49  
50  
51  
52  
53  
54  
55  
56  
57  
58  
59  
60
28. Mitchell AJ. A meta-analysis of the accuracy of the mini-mental state examination in the detection of dementia and mild cognitive impairment. *Journal of Psychiatric Research*. 2009 Jan 1;43(4):411–31.
  29. Shen Y, Shi Z, Jia R, Zhu Y, Cheng Y, Feng W, et al. The attenuation of retinal nerve fiber layer thickness and cognitive deterioration. *Frontiers in Cellular Neuroscience*. 2013;7:142.
  30. Méndez-Gómez JL, Rougier M-B, Tellouck L, Korobelnik J-F, Schweitzer C, Delyfer M-N, et al. Peripapillary Retinal Nerve Fiber Layer Thickness and the Evolution of Cognitive Performance in an Elderly Population. *Frontiers in Neurology*. 2017;8:93.
  31. Shi Z, Zhu Y, Wang M, Wu Y, Cao J, Li C, et al. The Utilization of Retinal Nerve Fiber Layer Thickness to Predict Cognitive Deterioration. *J Alzheimers Dis*. 2016;49(2):399–405.
  32. Ding J, Patton N, Deary IJ, Strachan MWJ, Fowkes FGR, Mitchell RJ, et al. Retinal microvascular abnormalities and cognitive dysfunction: a systematic review. *Br J Ophthalmol*. 2008;92(8):1017–25.
  33. Heringa SM, Bouvy WH, van den Berg E, Moll AC, Kappelle LJ, Biessels GJ. Associations between retinal microvascular changes and dementia, cognitive functioning, and brain imaging abnormalities: a systematic review. *J Cereb Blood Flow Metab*. 2013;33(7):983–95.
  34. Moher D, Liberati A, Tetzlaff J, Altman DG, The PRISMA Group (2009). Preferred Reporting Items for Systematic Reviews and Meta-Analyses: The PRISMA Statement. *PLoS Med* 6(7): e1000097. doi:10.1371/journal.pmed1000097
  35. Tan K-A, Agrawal R, Chhablani J. Choroidal Disorders [Internet]. Nikki Levy; 2017. Chapter 15, Choroidal Findings in Systemic Disorders. [cited 2021 Apr 20]. Available from: <https://www.sciencedirect.com/science/article/pii/B9780128053133000156>
  36. Sparrow JR, Hicks D, Hamel CP. The Retinal Pigment Epithelium in Health and Disease. *Curr Mol Med*. 2010 Dec;10(9):802–23.
  37. Balasubramanian R, Gan L. Development of Retinal Amacrine Cells and Their Dendritic Stratification. *Curr Ophthalmol Rep*. 2014 Sep 1;2(3):100–6.
  38. Kolb H, Fernandez E, Nelson R. Webvision: The Organization of the Retina and Visual System [Internet]. Salt Lake City (UT): University of Utah Health Sciences Center; 1995. Chapter 2, Outer

Plexiform Layer. [cited 2021 Apr 20]. Available from:

<http://www.ncbi.nlm.nih.gov/books/NBK11518/>

39. Öztürker ZK, Eltutar K, Karini B, Erkul SÖ, Osmanbaşoğlu ÖA, Sultan P. Optic nerve head topography and retinal structural changes in eyes with macrodisks: a comparative study with spectral domain optical coherence tomography. *Clin Ophthalmol*. 2016 Sep 12;10:1737–42.
40. Lima VC, Rosen RB, Farah M. Macular pigment in retinal health and disease. *International Journal of Retina and Vitreous*. 2016 Aug 15;2(1):19.
41. Chui TYP, Zhong Z, Song H, Burns SA. Foveal Avascular Zone and Its Relationship to Foveal Pit Shape. *Optom Vis Sci*. 2012 May;89(5):602–10.

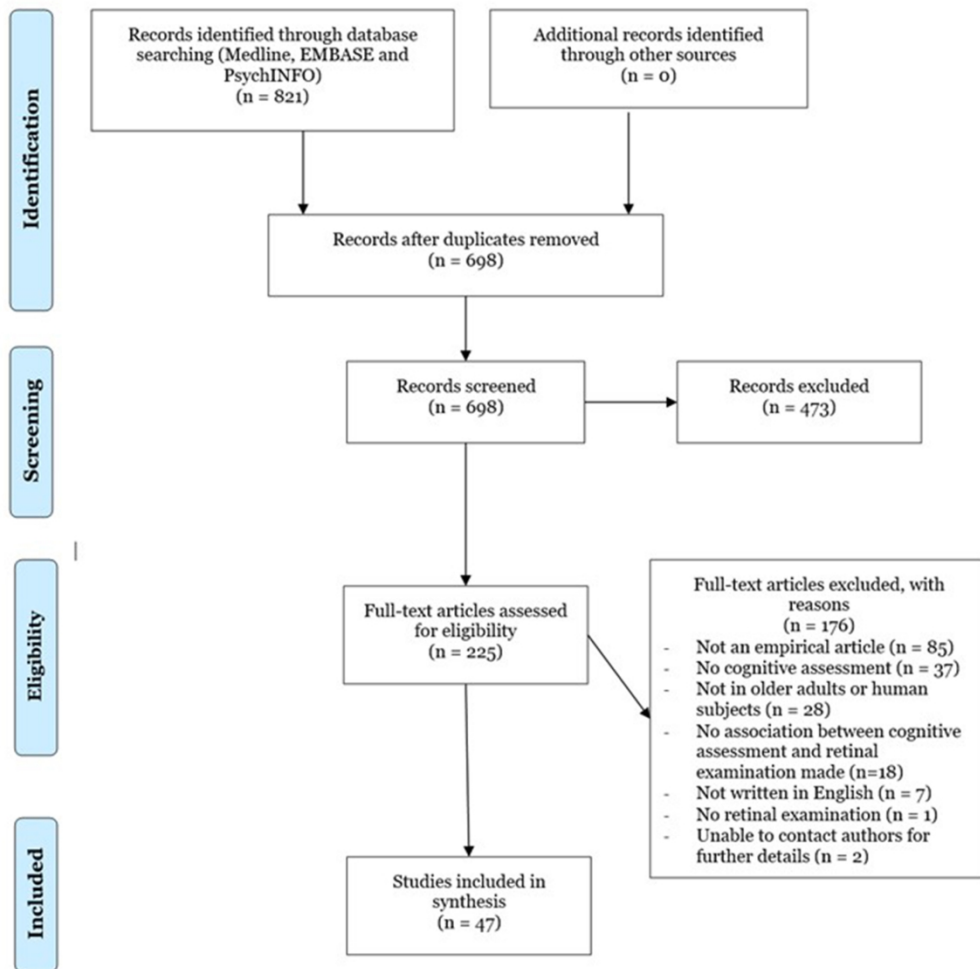

Figure 1. Preferred Reporting Items for Systematic Reviews and Meta-Analyses (PRISMA) flowchart describing the process of study selection.

184x182mm (300 x 300 DPI)

## Supplementary Appendix S1

### PRISMA 2009 Checklist

| Section/topic             | #  | Checklist item                                                                                                                                                                                                                                                                                              | Reported on page # |
|---------------------------|----|-------------------------------------------------------------------------------------------------------------------------------------------------------------------------------------------------------------------------------------------------------------------------------------------------------------|--------------------|
| <b>TITLE</b>              |    |                                                                                                                                                                                                                                                                                                             |                    |
| Title                     | 1  | Identify the report as a systematic review, meta-analysis, or both.                                                                                                                                                                                                                                         | 1                  |
| <b>ABSTRACT</b>           |    |                                                                                                                                                                                                                                                                                                             |                    |
| Structured summary        | 2  | Provide a structured summary including, as applicable: background; objectives; data sources; study eligibility criteria, participants, and interventions; study appraisal and synthesis methods; results; limitations; conclusions and implications of key findings; systematic review registration number. | 2 – 3              |
| <b>INTRODUCTION</b>       |    |                                                                                                                                                                                                                                                                                                             |                    |
| Rationale                 | 3  | Describe the rationale for the review in the context of what is already known.                                                                                                                                                                                                                              | 3 – 5              |
| Objectives                | 4  | Provide an explicit statement of questions being addressed with reference to participants, interventions, comparisons, outcomes, and study design (PICOS).                                                                                                                                                  | 5                  |
| <b>METHODS</b>            |    |                                                                                                                                                                                                                                                                                                             |                    |
| Protocol and registration | 5  | Indicate if a review protocol exists, if and where it can be accessed (e.g., Web address), and, if available, provide registration information including registration number.                                                                                                                               | 3                  |
| Eligibility criteria      | 6  | Specify study characteristics (e.g., PICOS, length of follow-up) and report characteristics (e.g., years considered, language, publication status) used as criteria for eligibility, giving rationale.                                                                                                      | 6                  |
| Information sources       | 7  | Describe all information sources (e.g., databases with dates of coverage, contact with study authors to identify additional studies) in the search and date last searched.                                                                                                                                  | 5                  |
| Search                    | 8  | Present full electronic search strategy for at least one database, including any limits used, such that it could be repeated.                                                                                                                                                                               | 5                  |
| Study selection           | 9  | State the process for selecting studies (i.e., screening, eligibility, included in systematic review, and, if applicable, included in the meta-analysis).                                                                                                                                                   | 6                  |
| Data collection process   | 10 | Describe method of data extraction from reports (e.g., piloted forms, independently, in duplicate) and any processes for obtaining and confirming data from investigators.                                                                                                                                  | 6 – 7              |
| Data items                | 11 | List and define all variables for which data were sought (e.g., PICOS, funding sources) and any assumptions and simplifications made.                                                                                                                                                                       | 6 – 7              |

|                                    |    |                                                                                                                                                                                                                        |                            |
|------------------------------------|----|------------------------------------------------------------------------------------------------------------------------------------------------------------------------------------------------------------------------|----------------------------|
| Risk of bias in individual studies | 12 | Describe methods used for assessing risk of bias of individual studies (including specification of whether this was done at the study or outcome level), and how this information is to be used in any data synthesis. | 7                          |
| Summary measures                   | 13 | State the principal summary measures (e.g., risk ratio, difference in means).                                                                                                                                          | 7                          |
| Synthesis of results               | 14 | Describe the methods of handling data and combining results of studies, if done, including measures of consistency (e.g., $I^2$ ) for each meta-analysis.                                                              | 7                          |
| Risk of bias across studies        | 15 | Specify any assessment of risk of bias that may affect the cumulative evidence (e.g., publication bias, selective reporting within studies).                                                                           | 7                          |
| Additional analyses                | 16 | Describe methods of additional analyses (e.g., sensitivity or subgroup analyses, meta-regression), if done, indicating which were pre-specified.                                                                       | -                          |
| <b>RESULTS</b>                     |    |                                                                                                                                                                                                                        |                            |
| Study selection                    | 17 | Give numbers of studies screened, assessed for eligibility, and included in the review, with reasons for exclusions at each stage, ideally with a flow diagram.                                                        | 7                          |
| Study characteristics              | 18 | For each study, present characteristics for which data were extracted (e.g., study size, PICOS, follow-up period) and provide the citations.                                                                           | 15 – 19                    |
| Risk of bias within studies        | 19 | Present data on risk of bias of each study and, if available, any outcome level assessment (see item 12).                                                                                                              | 22 – 23                    |
| Results of individual studies      | 20 | For all outcomes considered (benefits or harms), present, for each study: (a) simple summary data for each intervention group (b) effect estimates and confidence intervals, ideally with a forest plot.               | (a) 20 – 21<br>(b) 24 – 26 |
| Synthesis of results               | 21 | Present results of each meta-analysis done, including confidence intervals and measures of consistency.                                                                                                                | -                          |
| Risk of bias across studies        | 22 | Present results of any assessment of risk of bias across studies (see Item 15).                                                                                                                                        | 10                         |
| Additional analysis                | 23 | Give results of additional analyses, if done (e.g., sensitivity or subgroup analyses, meta-regression [see Item 16]).                                                                                                  | -                          |
| <b>DISCUSSION</b>                  |    |                                                                                                                                                                                                                        |                            |
| Summary of evidence                | 24 | Summarize the main findings including the strength of evidence for each main outcome; consider their relevance to key groups (e.g., healthcare providers, users, and policy makers).                                   | 10 – 14                    |
| Limitations                        | 25 | Discuss limitations at study and outcome level (e.g., risk of bias), and at review-level (e.g., incomplete retrieval of identified research, reporting bias).                                                          | 13                         |
| Conclusions                        | 26 | Provide a general interpretation of the results in the context of other evidence, and implications for future research.                                                                                                | 14                         |
| <b>FUNDING</b>                     |    |                                                                                                                                                                                                                        |                            |



1  
2  
3  
4  
5  
6  
7  
8  
9  
10  
11  
12  
13  
14  
15  
16  
17  
18  
19  
20  
21  
22  
23  
24  
25  
26  
27  
28  
29  
30  
31  
32  
33  
34  
35  
36  
37  
38  
39  
40  
41  
42  
43  
44  
45  
46  
47  
48  
49  
50  
51  
52  
53  
54  
55  
56  
57  
58  
59  
60

|         |    |                                                                                                                                            |   |
|---------|----|--------------------------------------------------------------------------------------------------------------------------------------------|---|
| Funding | 27 | Describe sources of funding for the systematic review and other support (e.g., supply of data); role of funders for the systematic review. | 3 |
|---------|----|--------------------------------------------------------------------------------------------------------------------------------------------|---|

For peer review only

## Supplementary Appendix S2

### Additional Methods

#### Search strategy used in Medline database

- (1) “Diagnostic techniques, ophthalmological/ or electroretinography/ or eye movement measurements/ or electronystagmography/ or electrooculography/”, (2) “Tomography, Optical Coherence/”, (3) “Optical coherence tomography.ti,ab.”, (4) “(eye-track\* or eye track\*).mp.”, (5) “Retina\* exam\*.ti,ab.”, (6) “Ophthalmic assessment\*.ti,ab.”, (7) “1 or 2 or 3 or 4 or 5 or 6”, (8) “Exp Retina/”, (9) “Retina\*.ti,ab.”, (10) “8 or 9”, (11) “7 and 10”, (12) “Exp Dementia/”, (13) “(dementia or cognitive impairment\*).ti,ab.”, (14) “12 or 13”, and (15) “11 and 14”

**Supplementary Table 1.** Definitions of terminology used in the included studies

| Terminology                                                | Number of Articles that Utilised these Terms | Definition                                                                                                                                                                                                                                                                                                                      | Reference(s)             |
|------------------------------------------------------------|----------------------------------------------|---------------------------------------------------------------------------------------------------------------------------------------------------------------------------------------------------------------------------------------------------------------------------------------------------------------------------------|--------------------------|
| <b>Optical Coherence Tomography (OCT)</b>                  | 41                                           | Non-invasive technique to acquire high resolution, cross-sectional images of the retina                                                                                                                                                                                                                                         | Almeida 2019             |
| <b>SD-OCT</b>                                              | 18                                           | Uses a light source with a longer-wavelength to promote deeper tissue penetration. It detects light echoes through an interferometer with a spectrometer.                                                                                                                                                                       | Adhi 2013                |
| <b>SS-OCT</b>                                              | 1                                            | Measures light echoes using photodetectors, thus improving the signal quality in deep tissue to enhance choroid visualisation.                                                                                                                                                                                                  | Adhi 2013                |
| <b>Fluorescence Lifetime Imaging Ophthalmoscopy (FLIO)</b> | 1                                            | Measures the autofluorescence intensity emitted by endogenous fluorophores contained within the retina to determine retinal metabolic activity.                                                                                                                                                                                 | Dysli 2017; Jentsch 2014 |
| <b>Laser Doppler Retinal Blood Flow</b>                    | 1                                            | Measures the retinal blood flow rate, centreline blood speed and blood column diameter in a major temporal retinal vein. As the vein with the largest diameter drains the largest portion of the total retinal blood flow, the blood flow measured within this retinal vein will be representative of total retinal blood flow. | Feke 2015                |
| <b>Alzheimer’s dementia (AD)</b>                           | 37                                           | Most common form of dementia characterised by progressive deterioration in cognition, executive functioning, learning and episodic memory                                                                                                                                                                                       | Gao 2015                 |
| <b>Mild cognitive impairment (MCI)</b>                     | 19                                           | Preclinical phase of AD characterised by cognitive decline that is significant for their                                                                                                                                                                                                                                        | Gao 2015; Almeida 2019   |

|                                                     |    |                                                                                                                                                                                               |                      |
|-----------------------------------------------------|----|-----------------------------------------------------------------------------------------------------------------------------------------------------------------------------------------------|----------------------|
|                                                     |    | age but does not compromise functioning or activities of daily living                                                                                                                         |                      |
| <b>Choroid</b>                                      | 4  | Vascular layer located between the sclera and retina of the eye which supplies oxygen and nutrients to the outer third of the retina, retinal pigment epithelium and part of the optic nerve. | Tan 2017             |
| <b>Retinal pigment epithelium (RPE)</b>             | 1  | Single layer of pigmented, cuboidal cells which regulates the transport of nutrients, ions, and water, absorbs scattered light and partakes in phagocytosis of shed photoreceptors.           | Sparrow 2010         |
| <b>Outer nuclear layer of the retina (ONL)</b>      | 1  | Contains cell bodies of photoreceptors, the rods and cones                                                                                                                                    | Balasubramaniam 2014 |
| <b>Outer plexiform layer (OPL)</b>                  | 2  | Synapse between the cells located in the INL (bipolar and horizontal cells) and ONL (rods and cones) occurs in the OPL.                                                                       | Kolb 1995            |
| <b>Inner nuclear layer of the retina (INL)</b>      | 2  | Composed of the cell bodies of bipolar, horizontal, interplexiform, amacrine and Müller cells, and occasionally displaced ganglion cells                                                      | Balasubramaniam 2014 |
| <b>Ganglion cell inner plexiform layer (GC-IPL)</b> | 10 | Comprised of the dendrites and cell bodies of retinal ganglion cells                                                                                                                          | Öztürker 2016        |
| <b>Ganglion cell complex (GCC)</b>                  | 11 | Composed of the retinal nerve fibre layer (RNFL), ganglion cell layer (GCL) and inner plexiform layer (IPL)                                                                                   | Öztürker 2016        |
| <b>Retinal nerve fibre layer (RNFL)</b>             | 25 | Comprised of nonmyelinated retinal ganglion cell axons that form the optic nerve                                                                                                              | Shi 2019             |
| <b>Macula</b>                                       | 17 | Central, oval-shaped region of the retina comprising of a highest density of cone photoreceptions which is responsible for visual acuity                                                      | Lima 2016            |
| <b>Foveal Avascular Zone (FAZ)</b>                  | 6  | Central region of the fovea, characterised by an absence of blood vessels, rods, inner retinal tissue and peak cone density. The fovea is the central area of the macula.                     | Chui 2012            |

# BMJ Open

## Association between retinal markers and cognition in older adults: a systematic review

|                                 |                                                                                                                                                                                                                                                                                                                                                                                                                                                                                                                                                                                                                  |
|---------------------------------|------------------------------------------------------------------------------------------------------------------------------------------------------------------------------------------------------------------------------------------------------------------------------------------------------------------------------------------------------------------------------------------------------------------------------------------------------------------------------------------------------------------------------------------------------------------------------------------------------------------|
| Journal:                        | <i>BMJ Open</i>                                                                                                                                                                                                                                                                                                                                                                                                                                                                                                                                                                                                  |
| Manuscript ID                   | bmjopen-2021-054657.R1                                                                                                                                                                                                                                                                                                                                                                                                                                                                                                                                                                                           |
| Article Type:                   | Original research                                                                                                                                                                                                                                                                                                                                                                                                                                                                                                                                                                                                |
| Date Submitted by the Author:   | 20-Apr-2022                                                                                                                                                                                                                                                                                                                                                                                                                                                                                                                                                                                                      |
| Complete List of Authors:       | Jeevakumar, Varshanie; Macquarie University, Australian Institute of Health Innovation<br>Sefton, Rebekah; Macquarie University, Australian Institute of Health Innovation<br>Chan, Joyce; New Look Eyewear<br>Gopinath, Bamini; Macquarie University, Department of Linguistics, Australian Hearing Hub<br>Liew, Gerald; The University of Sydney, Centre for Vision Research<br>Shah, Tejal; Macquarie University, Macquarie Medical School<br>Siette, Joyce; Western Sydney University, MARCS Institute for Brain, Behaviour and Development; Macquarie University, Australian Institute of Health Innovation |
| <b>Primary Subject Heading</b>: | Ophthalmology                                                                                                                                                                                                                                                                                                                                                                                                                                                                                                                                                                                                    |
| Secondary Subject Heading:      | Ophthalmology                                                                                                                                                                                                                                                                                                                                                                                                                                                                                                                                                                                                    |
| Keywords:                       | OPHTHALMOLOGY, Medical ophthalmology < OPTHALMOLOGY, Neuro-ophthalmology < OPTHALMOLOGY, Dementia < NEUROLOGY, HAEMATOLOGY                                                                                                                                                                                                                                                                                                                                                                                                                                                                                       |
|                                 |                                                                                                                                                                                                                                                                                                                                                                                                                                                                                                                                                                                                                  |

SCHOLARONE™  
Manuscripts



I, the Submitting Author has the right to grant and does grant on behalf of all authors of the Work (as defined in the below author licence), an exclusive licence and/or a non-exclusive licence for contributions from authors who are: i) UK Crown employees; ii) where BMJ has agreed a CC-BY licence shall apply, and/or iii) in accordance with the terms applicable for US Federal Government officers or employees acting as part of their official duties; on a worldwide, perpetual, irrevocable, royalty-free basis to BMJ Publishing Group Ltd ("BMJ") its licensees and where the relevant Journal is co-owned by BMJ to the co-owners of the Journal, to publish the Work in this journal and any other BMJ products and to exploit all rights, as set out in our [licence](#).

The Submitting Author accepts and understands that any supply made under these terms is made by BMJ to the Submitting Author unless you are acting as an employee on behalf of your employer or a postgraduate student of an affiliated institution which is paying any applicable article publishing charge ("APC") for Open Access articles. Where the Submitting Author wishes to make the Work available on an Open Access basis (and intends to pay the relevant APC), the terms of reuse of such Open Access shall be governed by a Creative Commons licence – details of these licences and which [Creative Commons](#) licence will apply to this Work are set out in our licence referred to above.

Other than as permitted in any relevant BMJ Author's Self Archiving Policies, I confirm this Work has not been accepted for publication elsewhere, is not being considered for publication elsewhere and does not duplicate material already published. I confirm all authors consent to publication of this Work and authorise the granting of this licence.

# Association between retinal markers and cognition in older adults: a systematic review

Varshanie Jeevakumar<sup>1</sup>, Rebekah Sefton<sup>1</sup>, Joyce Chan<sup>2</sup>, Bamini Gopinath<sup>3</sup>, Gerald Liew<sup>4</sup>, Tejal M. Shah<sup>5</sup>, Joyce Siette<sup>1,6\*</sup>

1. Australian Institute of Health Innovation, Macquarie University, North Ryde, NSW, Australia
2. New Look Eyewear, Maitland, NSW, Australia
3. Department of Linguistics, Australian Hearing Hub, Macquarie University, North Ryde, NSW, Australia
4. Department of Ophthalmology, Faculty of Medicine, Westmead Institute for Medical Research, University of Sydney, Sydney, NSW, Australia
5. Macquarie Medical School, Macquarie University, North Ryde, NSW, Australia
6. MARCS Institute for Brain, Behaviour and Development, Western Sydney University, Westmead, NSW, Australia

\*Correspondence to Dr Joyce Siette; [joyce.siette@westernsydney.edu.au](mailto:joyce.siette@westernsydney.edu.au)

## ABSTRACT

**Objectives** To appraise the existing literature reporting an association between retinal markers and cognitive impairment in adults aged 65 years and over and to provide directions for future use of retinal scanning as a potential tool for dementia diagnosis.

**Design** Systematic review of peer-reviewed empirical articles investigating the association of retinal markers in assessing cognitive impairment.

**Data sources** Three electronic databases, Medline, PsychINFO, and EMBASE were searched from inception until March 2022.

**Eligibility criteria** All empirical articles in English investigating the association between retinal markers and cognition in humans aged  $\geq 65$  years using various retinal scanning methodologies were included. Studies with no explicit association between retinal scanning findings and cognition were excluded. Risk of bias was assessed using the QUADAS Tool.

**Data extraction and synthesis** Data extraction was conducted by two authors (VJ, RS) and reviewed by another author (JS). Results were synthesised and described narratively.

**Results** Sixty-seven eligible studies examining 6,815 older adults were included. Majority of studies were cross-sectional (n=60; 89.6%). Optical coherence tomography (OCT) was the most commonly used retinal scanning methodology to measure the thickness of retinal nerve fibre layer, the ganglion cell complex, choroid, and macula. 51.1% of cross-sectional studies using OCT reported an association between the thinning of at least one retinal parameter and poor cognition. Longitudinal studies (n=6) using OCT also mostly identified significant reductions in retinal nerve fibre layer thickness as associated with cognitive decline. Study quality was overall moderate.

**Conclusion** Retinal nerve fibre layer thickness is associated with cognitive performance and therefore may have the potential to detect cognitive impairment in older adults. Further longitudinal studies are

1  
2  
3 required to validate our systematic review synthesis and understand underlying mechanisms before  
4  
5 recommending implementation of OCT as a dementia screening tool in clinical practice.  
6  
7

8 **PROSPERO registration number:** CRD42020176757  
9

10  
11 **Key words:** Retinal scanning, cognitive screening tests, cognitive impairment, optical coherence  
12  
13 tomography, ganglion cell complex, choroid, macula  
14  
15

### 16 17 18 **STRENGTHS AND LIMITATIONS OF THIS STUDY** 19

- 20  
21
- 22 • This systematic review provides an in-depth evaluation of the relationship between retinal  
23 markers identified using various scanning methods and early detection of cognitive impairment  
24 in older adults to inform future research and clinical practice.  
25  
26
  - 27 • This review includes a substantially larger number of empirical articles than previous  
28 systematic reviews, as well as the inclusion of three longitudinal studies to establish cause-and-  
29 effect relationships between retinal scanning and cognitive performance.  
30  
31
  - 32 • The included studies were methodologically rated using appropriate tools.  
33  
34
  - 35 • Majority of the included studies are cross-sectional and have used different retinal imaging  
36 devices and therefore it is not possible to compare measurements across devices.  
37  
38  
39  
40  
41  
42  
43  
44  
45  
46  
47  
48  
49  
50  
51  
52  
53  
54  
55  
56  
57  
58  
59  
60



## INTRODUCTION

The last decade has seen a substantial increase in research focused on the identification, development, and validation of diagnostic and prognostic retinal biomarkers for dementia, particularly Alzheimer's disease (AD)<sup>1</sup>. AD is the most common form of dementia and affects 60-70% dementia cases. There is no cost-effective, clinically established early AD diagnostic marker. Retinal biomarkers may be advantageous because they are cost and time efficient, can be assessed non-invasively, and present a minimal degree of patient risk and a high degree of accessibility<sup>2</sup>. With one in ten Australians aged over 65 with dementia and 50 million people affected worldwide<sup>3</sup>, cognitive impairment is a prevalent issue in our ageing population. The worldwide cost of dementia is estimated to be US\$818 billion in 2015<sup>3</sup>, and therefore, early detection of AD that could reflect the deposition of amyloid-beta (A $\beta$ , a pathological hallmark feature found in AD brain) in the brain and the resulting cognitive impairment will be of high economic benefit. It is now evident that deposition of A $\beta$  in the brain occurs 15-20 years earlier than the onset of cognitive decline<sup>4</sup>. Early diagnosis could help develop preventive or delaying strategies, lower mortality rates, allow timely access to medication, improve quality of life, stabilise cognitive decline, and/or minimise preventable hospital visits<sup>5</sup>.

As the retina forms as an outgrowth of the brain during embryological development, retinal cells reflects that of the brain and spinal cord<sup>6</sup>. Therefore, retinal changes may reflect brain changes and may allow detection of dementia before symptoms manifest, unlike traditional neuropsychological screening tests which primarily detect cognitive impairment following presentation of warning signs, such as memory loss<sup>7</sup>. Apart from the effects of normal ageing, marked inter-individual differences in the rate of cognitive decline indicate that other age-associated pathologies may be involved, such as macro- or microvascular disease.

Several pathobiological markers have been suggested as potential predictors of cognitive dysfunction and of these, retinal microvascular signs may offer the most promise. A study by Ong *et*

1  
2  
3 *al.* found an association between retinal neuronal damage and grey matter atrophy, which indicates  
4 that retinal changes may reflect cerebral neurodegenerative changes and thus, predict cognitive  
5 decline<sup>8</sup>. Yoon *et al.* demonstrated that cerebral ventricular enlargement due to cerebral atrophy seen  
6 characteristically in AD as indicated by magnetic resonance imaging studies<sup>9</sup>, is mirrored in retinal  
7 microvasculature changes as measured through retinal scanning tools, such as optical coherence  
8 tomography (OCT). OCT is a non-invasive technique that acquires high-resolution, cross-sectional  
9 images of the retina and is the most common tool used clinically to assess neurodegenerative changes  
10 in the retina<sup>2</sup>. The OCT devices often vary, with some users adopting swept-source OCT (SS-OCT)  
11 devices while others used spectral-domain OCT (SD-OCT), which can impact light source, acquisition  
12 speed, and resolution<sup>10</sup>. Therefore, as a common tool in clinical practice, retinal OCT scanning could  
13 be used routinely as an accessible alternative to brain imaging that is both, faster to administer and less  
14 stressful to the patient with the potential to measure and quantify cognitive decline.

15  
16  
17  
18  
19  
20  
21  
22  
23  
24  
25  
26  
27  
28  
29  
30  
31  
32 A recent cross-sectional observation study has demonstrated the value of OCT in detecting  
33 dementia, identifying OCT measurements of the macula as a “useful diagnostic biomarker of cognitive  
34 function”<sup>11</sup> (pg. 117). However, there has been conflicting evidence on the effectiveness of ophthalmic  
35 scanning in mild cognitive impairment (MCI), the precursor of dementia. A significant correlation  
36 between OCT measurements in the inner retinal layers with cognitive screening assessments<sup>12</sup> has been  
37 reported, although Ito *et al.* saw no changes on OCT in MCI individuals, recommending further  
38 research<sup>11 13</sup>.

39  
40  
41  
42  
43  
44  
45  
46  
47  
48 Recent systematic reviews have attempted to analyse the association between cognitive  
49 functioning and retinal nerve fibre layer thickness (RNFL)<sup>12 14</sup>. Thomson *et al.* conducted a systematic  
50 review and meta-analysis of 17 articles and found a statistically significant reduction in RNFL in both  
51 AD and MCI patients when compared to healthy controls<sup>12</sup>. This study identified OCT as a potential  
52 diagnostic tool in assessing cognitive impairment, particularly for AD and MCI syndromes. However,  
53 the study did not consider the direct comparisons of RNFL thickness to that of cognitive domains

1  
2  
3 assessed using neuropsychological assessments and which the respective studies included in the review  
4  
5 would have used to make a diagnosis of AD and MCI. Similarly, in another meta-analysis study, Wang  
6  
7 *et al.* evaluated the relationship of peripheral RNFL thickness in AD and MCI from 19 studies and  
8  
9 found a progressive reduction in total RNFL thickness, particularly in the inferior and superior  
10  
11 quadrants, suggesting RNFL thickness as a candidate biomarker for early detection of AD<sup>14</sup>. However,  
12  
13 both reviews conducted in 2015 appraised only a small number of cross-sectional studies with no  
14  
15 consideration of cognitive impairment in forms other than AD and MCI. The role of the retinal layers  
16  
17 other than the nerve fibre layer such as the ganglion cell complex (GCC) thickness and macular  
18  
19 thickness as biomarkers in the assessment of cognitive impairment were also not evaluated.  
20  
21  
22  
23

24  
25 More recent systematic reviews and meta-analysis studies have reported similar findings as per  
26  
27 the aforementioned 2015 reviews. The study by Chan *et al.*<sup>15</sup> identified 30 cross-sectional studies to  
28  
29 report that the thickness of ganglion cell and inner plexiform layer (GC-IPL), GCC, macular volume  
30  
31 was significantly different between AD and the control group. AD group also showed reduced  
32  
33 peripapillary RNFL (pRNFL) thickness and choroidal thickness<sup>15</sup>. In another systematic review and  
34  
35 meta-analysis study by Mejia-Vergara *et al.*<sup>16</sup>, 15 studies that included MCI individuals only were  
36  
37 included to report that pRNFL and macular GCL-IPL thinning with reduced macular volume was  
38  
39 prominent in MCI when compared to the controls. A large effect size was observed for reduced  
40  
41 macular thickness in MCI individuals with significant heterogeneity for macular thickness. The study  
42  
43 concluded that more standardised and longitudinal studies were needed to support the role of OCT in  
44  
45 identifying reduced retinal layer and/or macular thickness as a biomarker for MCI due to AD<sup>16</sup>. The  
46  
47 study by Ge *et al.*<sup>17</sup> was broader in scope as the authors included retinal markers *per se* and not just  
48  
49 the RNFL thickness assessed using OCT. The study aimed to identify signature retinal markers in AD,  
50  
51 MCI and preclinical AD population. Of the 126 studies included in this systematic review and meta-  
52  
53 analysis, the authors reported reduced pRNFL, subfoveal choroid and total macular thickness in the  
54  
55 AD and MCI groups when compared to the control group. Overall, the study concluded that structural  
56  
57  
58  
59  
60

1  
2  
3 retinal changes such as RNFL, choroidal thinning; optic nerve degeneration and possibly A $\beta$   
4  
5 deposition; vascular retinal changes such as blood flow, vessel density and morphology and  
6  
7 electrophysiological changes showing dysfunction of the retinal layers could be helpful markers in the  
8  
9 diagnosis, prognosis and/or risk assessment for AD, MCI and/or preclinical AD population<sup>17</sup>. While  
10  
11 the study findings are broad and inconclusive, it gives an indication of studies that have explored retinal  
12  
13 markers other than the RNFL and reported an association in AD, MCI and/or preclinical AD  
14  
15 population.  
16  
17  
18  
19

20  
21 Despite the aforementioned review studies, the evidence is limited due to the small sample  
22  
23 sizes and comparison of retinal markers directly to AD and/or MCI diagnosis, making the findings  
24  
25 inconclusive as it underrepresents the target population and does not reflect the associated cognitive  
26  
27 domains. Another limitation is the extensive exclusion criteria and high comorbidity rate in the older  
28  
29 adult population with the prevalence of concomitant eye and systemic disease such as glaucoma and  
30  
31 diabetes respectively making them unsuitable candidates. Nevertheless, retinal scanning may be  
32  
33 valuable in monitoring disease progression and response to treatment.  
34  
35  
36

37  
38 To date, no systematic review and/or meta-analysis study has analysed the specific relationship  
39  
40 between retinal markers and cognitive screening tests that assess the functions of respective cognitive  
41  
42 domains. This systematic review aims to summarise the available evidence on the use of retinal  
43  
44 markers using various retinal scanning methodologies in older adults as an alternative to  
45  
46 comprehensive cognitive assessments used in dementia diagnosis and provide directions for future  
47  
48 research and clinical practice.  
49  
50

## 51 **METHODS**

52  
53

54  
55 We drafted a protocol for this review '*a priori*' and inclusion criteria were developed prior to  
56  
57 commencing the search. This review was registered on PROSPERO (CRD42020176757). We report  
58  
59  
60

1  
2  
3 according to the Preferred Reporting Items for Systematic Reviews and Meta-Analyses (PRISMA  
4  
5 2020) guidelines, and a checklist of PRISMA items is presented in the online supplementary data S1.  
6  
7

### 8 **Ethics approval statement**

9

10  
11 We used publicly accessible documents as evidence and did not collect individual personal  
12  
13 information from participants. As such it was not necessary to seek an institutional ethics approval  
14  
15 before commencing our review.  
16  
17

### 18 **Search strategy**

19

20  
21 A search strategy was developed using medical subject headings (MeSH) and key search terms  
22  
23 related to cognitive impairment and retinal scanning. Studies were identified through Medline (1806  
24  
25 – 2022), PsycINFO (1905 – 2022) and EMBASE (1974 – 2022) databases. An updated literature search  
26  
27 was undertaken prior to the final analysis to ensure up-to-date and relevant articles were included. Date  
28  
29 last searched was 17 March 2022. The search strategy (available in online supplementary data S2) was  
30  
31 deliberately broad in an effort to gather all eligible studies and was developed in collaboration with  
32  
33 the clinical librarian and reviewed by the project team. Reference lists of all included studies were  
34  
35 hand-searched for additional records. This search strategy was then adapted to the other databases  
36  
37 namely, PsychINFO and EMBASE.  
38  
39  
40  
41  
42

### 43 **Eligibility Criteria**

44

45  
46 All peer-reviewed empirical articles in English and using human subjects, including but not  
47  
48 limited to cross-sectional, population-based, case-control and longitudinal studies. Studies with no  
49  
50 explicit association between cognition and findings on retinal scanning were excluded.  
51  
52

53  
54 *Participants:* Inclusion criteria comprised of adults aged 65 years and over with diagnosed  
55  
56 cognitive impairment of any form and severity, including AD and mild cognitive impairment, and a  
57  
58 control group of cognitively healthy participants. The study was limited to subjects aged over 65 as  
59  
60

1  
2  
3 diagnosis of dementia is more prevalent in this age group. Exclusion criteria includes those with pre-  
4 existing ophthalmological, metabolic, cardiovascular, cerebrovascular, psychiatric, or other disease  
5 that could affect the visual field or neurological system. Other exclusion criteria include previous  
6 intraocular surgery or trauma, the inability of the participant to collaborate sufficiently to perform an  
7 OCT scan, and/or use of medications that could affect visual function.  
8  
9

10  
11  
12  
13  
14  
15 *Types of index and reference standard tests:* All participants in the chosen studies were  
16 screened using standard, traditional cognitive screening tests such as Mini-Mental State Examination  
17 (MMSE) and retinal scanning using OCT, OCT-Angiography (OCTA) or another technique (available  
18 in online supplementary data S2).  
19  
20  
21  
22  
23

24  
25 *Controls or comparators:* Cross-sectional and cohort studies will not have a comparator, but a  
26 case-control study should have an age- and sex-matched control group of cognitively healthy  
27 participants.  
28  
29  
30

### 31 32 **Data Extraction**

33  
34  
35  
36 The search results from Medline, PsychINFO and EMBASE were exported to Microsoft Excel  
37 sheet and duplicates were removed. Two authors (VJ and JS) reviewed titles, abstracts and full-text  
38 papers for eligibility. Authors resolved disagreement by discussion or, where necessary, a third author  
39 (JC) offered their view. Extraction was completed (VJ) using a standardised data sheet that was piloted  
40 with three papers and revised. All data extraction was verified by JS, and disagreement was resolved  
41 via discussion. Extracted data included, study design, participant demographics (including mean age,  
42 country of study), sample size, method of and parameters measured on retinal scanning, measure of  
43 cognitive function, type and degree of cognitive impairment, and relevant statistical data.  
44  
45  
46  
47  
48  
49  
50  
51  
52  
53

### 54 55 **Risk of bias assessment**

56  
57  
58 The Quality Assessment of Diagnostic Accuracy Studies (QUADAS) tool<sup>18</sup> was used as it  
59 assesses the quality of studies looking at diagnostic accuracy. This covers spectrum, disease  
60

1  
2  
3 progression, partial verification, differential verification, incorporation and review bias, and  
4 incomplete data outcomes e.g. withdrawals. Three reviewers (VJ, RS, JS) partook in the studies'  
5  
6 quality assessment and any discrepancy between reviewers was resolved through discussion and if an  
7  
8 agreement could not be reached, a third individual was consulted (JC).  
9  
10  
11  
12

### 13 **Statistical Analysis**

14  
15  
16 Owing to a high degree of heterogeneity that exists between studies, including study designs,  
17 population type, measures of retinal scanning and cognition, a meta-analysis of study results was not  
18 possible. A descriptive synthesis approach was utilised.  
19  
20  
21  
22

### 23 **Patient and public involvement**

24  
25  
26 No patient involved.  
27  
28

## 29 **RESULTS**

### 30 **Study design and population**

31  
32  
33 The search identified 821 articles, of which 67 studies were eligible (see **Figure 1**). Most  
34  
35 studies included were cross-sectional (60/67; 89.5%), with a few case-controls (2/67; 3.0%) and  
36  
37 longitudinal (6/67; 9.0%) studies (**Table 1**). Longitudinal studies had a range of two to 12-year follow-  
38  
39 ups. Studies were mostly conducted in these following countries: USA (13/67; 19.4%), China (9/67;  
40  
41 13.4%), Spain (9/67; 13.4%) and Italy (7/67; 10.4%). The type of cognitive impairment varied between  
42  
43 studies with 35 (52.2%) articles looking only at Alzheimer's Dementia (AD) and 9 (13.4%) at mild  
44  
45 cognitive impairment (MCI), and 23 (34.3%) for both groups. Across all studies, the mean age range  
46  
47 was 70.9 years for controls, 72.4 years for AD, and 73.0 years for MCI. The ratio of males to females  
48  
49 was approximately one-to-one across all studies, with a slight female predominance.  
50  
51  
52  
53  
54  
55

### 56 **Assessment of retinal abnormalities**

1  
2  
3 Retinal scanning was performed using several techniques (**Table 1, Supplementary**  
4 **Material**). The most common method used was OCT (40/67, 59.1%); SD-OCT (17/67); SS-OCT  
5 (1/67)) followed by OCTA (18/67; 26.9%) then fundus photography (3/67; 4.5%), Fluorescence  
6 Lifetime Imaging Ophthalmoscopy (FLIO) (1/67; 1.5%) and laser Doppler flowmetry (1/67; 1.5%).  
7 OCT is a non-invasive method that obtains cross-sectional images of the retina and calculates the  
8 thickness of all retinal layers including the nerve fibre layer, ganglion cell complex; choroid and  
9 macula<sup>10</sup>. In 12 (17.6%) studies, the Early Treatment of Diabetic Retinopathy Study (ETDRS) macular  
10 map sectors were used to divide the macula into nine segments to produce a retinal thickness map. The  
11 retinal nerve fibre layer (RNFL) thickness was calculated globally, and across either four or six  
12 segments.  
13  
14  
15  
16  
17  
18  
19  
20  
21  
22  
23  
24  
25  
26

27 OCTA acquires images of retinal vasculature to calculate perfusion and vascular density (VD),  
28 and foveal avascular zone (FAZ) area<sup>6</sup> whereas laser Doppler flowmetry calculates the retinal blood  
29 flow rate<sup>19</sup>. FLIO measures the autofluorescence intensity emitted by endogenous fluorophores  
30 contained within the retina to calculate retinal metabolic activity<sup>20 21</sup>. Fundus photography was also  
31 employed to obtain detailed images of the fundus within a 50-degree field of view of the macula, and  
32 the optic nerve head to evaluate retinal vasculature<sup>22</sup>.  
33  
34  
35  
36  
37  
38  
39  
40

41 As part of the work-up, a full ophthalmological scan was performed in 28 (59.6%) studies prior  
42 to retinal imaging, including assessment of best-corrected visual acuity (BCVA), dilated fundus scan,  
43 slit lamp scan of the anterior segment of the eye, intraocular pressure (IOP) measurement, and  
44 anatomical ocular measurements with optical biometry. Neuroimaging was performed in 20 (29.4%)  
45 studies to exclude alternate diagnoses, and nine (19.1%) studies used standard blood tests to rule out  
46 reversible causes of dementia. A comprehensive neuropsychological examination assessing cognitive  
47 performance was part of the initial work-up in 11 (23.4%) studies.  
48  
49  
50  
51  
52  
53  
54  
55  
56

### 57 **Assessment of cognitive function and impairment**

58  
59  
60



1  
2  
3 A summary of the assessment of cognitive function is shown in **Table 2**. Cognitive function  
4 was always measured using standard cognitive screening tools, with the most popular one being as  
5 Mini Mental State Examination (MMSE) (59/67; 88%), followed by Montreal Cognitive Assessment  
6 (MoCA) (9/67; 13.4%), the global clinical dementia rating score (CDR) (3/67; 4.5%) and the  
7 Alzheimer's Disease Assessment Scale-cognitive subscale (ADAS-cog) (2/67; 3%). These screening  
8 tests evaluate various cognitive domains including, orientation, attention, executive functions,  
9 memory, language, visuospatial skills, abstract thinking, and calculations. Cognitive screening tests  
10 were conducted by either neurologists, psychologists, physicians, or trained research associates.  
11  
12  
13  
14  
15  
16  
17  
18  
19  
20  
21

22 AD was diagnosed using DSM-IV criteria, National Institute of Neurologic and  
23 Communicative Disorders and Stroke-Alzheimer's Disease and Related Disorders Association  
24 (NINCDS-ADRDA)<sup>23</sup> criteria or generally through a combination of both approaches. The most  
25 common method to diagnose MCI was through the Peterson's criteria<sup>24</sup> which identifies whether all  
26 five criteria are satisfied including, memory complaint corroborated by an informant, objective  
27 memory decline, normal general cognitive function, normal functional activities, and absent dementia  
28 diagnosis.  
29  
30  
31  
32  
33  
34  
35  
36  
37  
38

### 39 **Association between cognition and retinal measurements**

40  
41  
42 Half of the studies found a significant correlation between RNFL (9/17, 52.9%) and GC-IPL  
43 thinning (6/11, 54.5%) with impaired cognition (**Table 3**). Some studies found a significant correlation  
44 between macular (14/30, 46.7%), macular retinal nerve fibre layer (mRNFL) (3/5, 60.0%), GCC (8/19,  
45 42.1%), choroidal thickness (CT) (4/9, 44.4%) and pRNFL thinning (5/21, 23.8%) with cognitive  
46 performance. These findings did not vary significantly between different OCT devices. Measures of  
47 retinal vascular structures using OCTA identified a correlation between VD (7/14, 50.0%), and FAZ  
48 area (3/9, 33.3%) with cognitive impairment.  
49  
50  
51  
52  
53  
54  
55  
56  
57

### 58 **Risk of Bias Assessment**

1  
2  
3 Risk of bias of the 67 studies are provided in **Table 4**. For over half the studies (39/67, 58.2%)  
4  
5 it was unclear whether the index test results were interpreted without the knowledge of the reference  
6  
7 standard, and vice versa (37/67, 55.2%). This could contribute to review bias, and thus impact the  
8  
9 diagnostic accuracy of the respective clinical tool. The time period between conducting the reference  
10  
11 standard and index test was unclear in 17 (25.3%) studies, suggesting that the influence of disease  
12  
13 progression bias cannot be excluded. All 67 studies were not representative of the target population as  
14  
15 patients with comorbidities that may affect the retina, including diabetes mellitus and hypertension  
16  
17 were excluded. This lack of generalisability may interfere with the implementation of retinal scanning  
18  
19 in clinical practice. However, the majority of studies (95.5%) provided a clear selection criterion and  
20  
21 all studies utilised an accurate reference standard. Partial verification, differential verification,  
22  
23 incorporation, and clinical review bias were minimal across the included studies. Considering this, the  
24  
25 overall risk of bias was moderate, and findings should be interpreted with caution.  
26  
27  
28  
29  
30  
31  
32  
33

## 34 **DISCUSSION**

35  
36  
37 Our review evaluated the relationship between retinal scanning methods and early detection of  
38  
39 cognitive impairment in older adults to inform future clinical practice. Over 50% of the studies using  
40  
41 OCT identified an association between the thinning of at least one retinal area and cognitive  
42  
43 impairment. The future of retinal imaging as a clinically useful tool for measuring cognition in older  
44  
45 adults is considered.  
46  
47  
48

49  
50 Within ophthalmology, retinal imaging devices are primarily used in the diagnosis of retinal  
51  
52 disease as well as serial monitoring of retinal conditions such as age-related macular degeneration and  
53  
54 response to treatment<sup>10</sup>. We identified two main retinal scanning methods, OCT and OCTA in this  
55  
56 review, with a more sensitive response from OCT. OCTA was primarily used to measure and evaluate  
57  
58 retinal vasculature, but measures of retinal thickness via OCT was considerably more effective in  
59  
60

1  
2  
3 detecting cognitive impairment. Studies using OCTA techniques have resulted in mixed findings<sup>25</sup>.  
4  
5 This may be due to the varied vessel distribution and morphology, including vessel size and number  
6  
7 of anastomoses between participants. The lack of uniformity in vessel size may affect vessel density  
8  
9 calculations, as the smaller surface area of capillaries may contribute to a more sensitive measure of  
10  
11 perfusion compared to larger vessels<sup>23</sup>. Additionally, fewer anastomoses within a vessel network  
12  
13 contributes to a higher risk of vascular dysfunction<sup>23</sup>. Considering this wide variability in vascular  
14  
15 network structure between individuals, OCTA may be suitable for detecting later stages of dementia  
16  
17 but may not be reliable in detecting the transition between age-related changes and MCI. Furthermore,  
18  
19 not all participants with MCI will convert to dementia, some may revert to normal cognition, thus  
20  
21 affecting the accuracy of the results<sup>23</sup>. Retinal layer thickness as measured through OCT does not vary  
22  
23 as extensively as OCTA and thus, serves as a suitable alternative for the early detection of dementia.  
24  
25  
26  
27  
28

29 Although OCT devices have been utilised for the past two decades, there has been no consistent  
30  
31 retinal area that is strongly associated with the cognitive function of older adults. This is consistent  
32  
33 across all types of OCT devices. Our findings indicate that thinning of the RNFL and pRNFL may be  
34  
35 associated with poorer cognitive function, however, within the last decade, studies have found more  
36  
37 varied results for pRNFL, with only six (out of 21, 28.6%) studies identifying an association<sup>13 26-30</sup>. On  
38  
39 the other hand, 45.5% of studies using OCT devices to measure RNFL thickness have identified a  
40  
41 positive correlation with cognitive impairment, although studies with larger sample sizes (e.g.,  
42  
43 Sanchez *et al.*<sup>31</sup>, 930; Van De Kreeke *et al.*<sup>32</sup>, 298) found no significant correlation. Indeed, researchers  
44  
45 have failed to consistently identify a correlation between retinal scanning and cognitive impairment,  
46  
47 for example two recent articles identified an association<sup>23 24</sup> with RNFL whereas two articles did not<sup>33</sup>  
48  
49 <sup>34</sup>. This lack of consistency is reflected across all retinal areas and the discrepancies may in part be  
50  
51 ascribed to differences in sample size, the severity of cognitive impairment, and the OCT technology  
52  
53 used in various devices.  
54  
55  
56  
57  
58  
59  
60

1  
2  
3 Mean RNFL and macular thickness maybe largely dependent on the type of OCT device used<sup>35</sup>.  
4  
5 The variety of devices identified in this review may thus affect the consistency of results across studies.  
6  
7 Moreover, as MCI represents a transition towards dementia, reductions in pRNFL and macular  
8  
9 thickness, if any, are likely to be subtle, perhaps even within the normal range, when compared with  
10  
11 healthy age-matched control subjects. Furthermore, these cross-sectional studies present data at a  
12  
13 single point in time after the participant has been diagnosed with cognitive impairment. The lack of  
14  
15 baselines measures from cognitively healthy participants creates difficulty in detecting subtle changes  
16  
17 in their cognitive performance. Therefore, our findings need to be interpreted with caution.  
18  
19  
20  
21

22 The inconsistencies between studies can also be attributed to the lack of sensitivity of cognitive  
23  
24 screening tools, such as the MMSE which is largely used to assess cognition, but we know is  
25  
26 ineffective in identifying cognitive impairment at its early stages<sup>36</sup>. Despite these mixed results, cross-  
27  
28 sectional studies present data at a single point in time and therefore, the dynamic change in the  
29  
30 relationship between retinal thickness and cognition is unable to be quantified. It seems therefore that  
31  
32 with only limited evidence thus far, caution will be needed in interpreting the rate of change of an  
33  
34 individual's RNFL thickness in terms of their cognitive status. Furthermore, given the physiological  
35  
36 variations in RNFL thickness, single time-point measurements in individual participants are likely to  
37  
38 have limited value.  
39  
40  
41  
42  
43

44 Our review innovates by appraising six well-sized longitudinal studies<sup>37-41</sup> (sample size 78-  
45  
46 427), to further establish cause-and-effect relationships between retinal scanning and cognitive  
47  
48 deterioration. We found that OCT measurements of RNFL thickness including inferior quadrant RNFL  
49  
50 thickness<sup>37 39 40</sup> and pRNFL thickness<sup>38</sup> was able to detect reductions in these areas over time, and was  
51  
52 associated with decline in cognitive abilities such as impaired recall<sup>37</sup>, immediate and delayed  
53  
54 memory<sup>37</sup> and episodic memory<sup>38</sup>. Whilst cognitive decline was found to be associated with  
55  
56 longitudinal reduction in inferior quadrant thickness<sup>38</sup>, the association is less clear for other retinal  
57  
58 regions around the GCC<sup>42</sup> and macular thickness<sup>42</sup>. Our results suggest the ability of OCT to  
59  
60

1  
2  
3 potentially detect longitudinal changes in RNFL thickness and declining cognition, although further  
4  
5 longitudinal efforts need to be carried out to determine the true nature of cognitive decline with retinal  
6  
7 changes.  
8  
9

10 A systematic review by Ding *et al.*<sup>43</sup> evaluated six studies and identified a positive relationship  
11  
12 between retinal vascular signs, and information processing speed, verbal memory, and executive  
13  
14 function. However, the lack of consistency between study findings due to differences in retinal  
15  
16 scanning methodology, small sample size, and cognitive screening tools were recognised and limited  
17  
18 interpretation. An updated review by Heringa *et al.*<sup>44</sup> identified a moderately strong association  
19  
20 between microvascular and cerebral changes, and dementia diagnosis across 32 studies. They  
21  
22 concluded that although retinal vascular assessment can be incorporated into prediction models, only  
23  
24 a minority of dementia cases were attributed to retinal vascular changes. These reviews support the  
25  
26 potential role of retinal vascular changes in the pathophysiology of cognitive impairment but  
27  
28 recommend the need for more prospective data. Our review adds to the existing literature by providing  
29  
30 greater insight into the role of OCT in the early detection of cognitive impairment through measures  
31  
32 of retinal layer thickness.  
33  
34  
35  
36  
37  
38

39 Our study has several limitations. First, participants in the included studies were not  
40  
41 representative of the sample population and individuals with chronic conditions, such as diabetes  
42  
43 mellitus, hypertension and neurological conditions were excluded. These comorbidities are common  
44  
45 in the older population and affect the generalisability of our findings. Further studies including patients  
46  
47 with these comorbidities are required to identify whether retinal scanning is a viable biomarker in  
48  
49 cognitive impairment. Second, some studies were missing data in several domains, including global  
50  
51 cognition scores or correlation metrics, which excluded their entry in the review and may compromise  
52  
53 publication bias. As noted earlier, most studies have included MMSE and MoCA tests which are not  
54  
55 sensitive measures to detect early changes in cognition in dementia, and therefore, diminishes the  
56  
57 impact of our findings, as the studies do not provide adequate evidence to endorse retinal imaging as  
58  
59  
60

1  
2  
3 a screening tool. Future retinal imaging studies should include a comprehensive neuropsychological  
4 battery to measure specific cognitive domains such as executive function, speed of processing, episodic  
5 memory, attention and global cognition as these domains are most impacted in dementia. Third, our  
6 search strategy was very specific, and this may have excluded studies that were relevant to our review.  
7  
8 Fourth, only sixteen (23.9%) studies evaluating OCTA were included in this review resulting in mixed  
9 findings. This may explain why other studies specifically assessing OCTA with a larger sample size  
10 may have identified a positive correlation<sup>25</sup>. Fifth, a major concern is that the studies use different  
11 company devices (such as Spectralis, Zeiss, Optovue) to measure retinal neuronal thickness, and  
12 comparing across these manufacturers is fruitless, as all the devices use proprietary software and  
13 respective post-processing algorithms for their images.  
14  
15  
16  
17  
18  
19  
20  
21  
22  
23  
24  
25  
26

27 Our study has some strengths. This is the first systematic review that has evaluated multiple  
28 retinal scanning tools across several forms of cognitive impairment. We reviewed extensively more  
29 empirical articles than previous systematic reviews<sup>43 44</sup>, comprising of a larger, international sample  
30 and summarised the recent results of longitudinal studies, adding substantial insight.  
31  
32  
33  
34  
35  
36

37 Earlier diagnosis of dementia using non-invasive techniques will improve patient care, quality  
38 of life, disease management, and clinical outcome<sup>5</sup>. Cognitive screening tools currently used in routine  
39 clinical practice, such as MMSE are not sensitive in detecting cognitive impairment in its earlier stages,  
40 are time-consuming and can be stressful for the patient<sup>36</sup>. OCT is a sensitive alternative that provides  
41 a rapid assessment of the retina to detect changes consistent with cognitive impairment, such as RNFL  
42 thinning. Advances in OCT technology, especially the advent of Fourier-domain OCT (ED-OCT), and  
43 more recently SS-OCT, which improves acquisition speed and resolution of retinal images, will further  
44 make accurate quantitative segmented retinal layer analysis possible. Introducing OCT as part of the  
45 Medicare Benefits Schedule (MBS) could allow optometrists to additionally provide annual cognitive  
46 screening to older adults. This would enable earlier detection of cognitive impairment and thus the  
47  
48  
49  
50  
51  
52  
53  
54  
55  
56  
57  
58  
59  
60

1  
2  
3 provision of both pharmacological and non-pharmacological interventions to slow or stabilise disease  
4  
5 progression<sup>5</sup>.  
6  
7

8 In conclusion, whilst cross-sectional studies have inconsistently recognised a link between  
9  
10 retinal scanning methods and cognitive impairment, recent longitudinal studies provide stronger  
11  
12 evidence on the diagnostic utility of OCT in detecting a declining cognitive status. Further longitudinal  
13  
14 studies should be conducted to corroborate these findings before retinal scanning can be introduced  
15  
16 into clinical practice as a viable tool for detecting cognitive impairment. Studies using more sensitive  
17  
18 cognitive screening tools are required to assess the viability of retinal measures as a biomarker in  
19  
20 cognitive decline.  
21  
22  
23  
24  
25  
26  
27  
28  
29  
30  
31  
32  
33  
34  
35  
36  
37  
38  
39  
40  
41  
42  
43  
44  
45  
46  
47  
48  
49  
50  
51  
52  
53  
54  
55  
56  
57  
58  
59  
60

## DECLARATIONS

## CONTRIBUTORS

JS conceptualised the study and produced with VJ the first draft of the manuscript. BG reviewed the study design and provided feedback. JS and VJ devised the search strategy which was carried out by VJ. JS completed the blinded 5% review of abstracts with BG acting as arbitrator. VJ reviewed the remainder of the abstracts. JS and VJ carried out the full-text review, followed by the data extraction and quality assessment of included articles. VJ developed the initial frameworks with JS providing feedback. JS and RS conducted the full-text review and data extraction of an updated search in March 2022. JC contributed to identification of OCT machines and critical revisions. GL and TS provided essential write-up and feedback on early drafts. All authors contributed to critical revisions of subsequent manuscript drafts and approved the final submission.

## FUNDING

This body of work was not funded.

## COMPETING INTERESTS

The authors declare that they have no conflicts of interest to disclose.

## PATIENT CONSENT FOR PUBLICATION

Not required.

## DATA AVAILABILITY STATEMENT

Data are available upon reasonable request. The data are available upon request from the corresponding author ([joyce.siette@westernsydney.edu.au](mailto:joyce.siette@westernsydney.edu.au))



## FIGURES AND TABLES

**Figure 1.** Preferred Reporting Items for Systematic Reviews and Meta-Analyses (PRISMA) flowchart describing the process of study selection.

**Table 1.** Characteristics of studies included in the systematic review (n=67).

**Table 2.** Study characteristics of cognitive assessment and score (n=67).

**Table 3.** Associations between diagnosed dementia status (e.g., AD) and retinal markers

**Table 4.** Summary of QUADAS score of the 67 included studies.

For peer review only

**Table 1.** Characteristics of studies included in the systematic review (n=67).

| Year | Author                        | Country     | Design | Areas of retinal measured |       |       |     |        |       |    |     |    |     |       | Sample size    | Method |                    |
|------|-------------------------------|-------------|--------|---------------------------|-------|-------|-----|--------|-------|----|-----|----|-----|-------|----------------|--------|--------------------|
|      |                               |             |        | RNFL                      | mRNFL | pRNFL | GCC | GC-IPL | MT/MV | CT | FAZ | VD | RVN | Other |                |        |                    |
| 2001 | Parisi <sup>45</sup>          | Italy       | CS     | •                         |       |       |     |        |       |    |     |    |     |       |                | 31     | OCT                |
| 2006 | Iseri <sup>46</sup>           | Turkey      | CS     | •                         |       |       |     |        |       | •  |     |    |     |       |                | 29     | OCT                |
| 2011 | Kesler <sup>47</sup>          | Israel      | CS     | •                         |       |       |     |        |       |    |     |    |     |       |                | 78     | OCT                |
| 2013 | Kirbas <sup>48</sup>          | Turkey      | CS     | •                         |       | •     |     |        |       |    |     |    |     |       |                | 80     | SD-OCT             |
| 2013 | Shen <sup>37</sup>            | China       | L      | •                         |       |       |     |        |       |    |     |    |     |       |                | 78     | OCT                |
| 2014 | Ascaso <sup>49</sup>          | Spain       | CS     | •                         |       |       |     |        |       | •  |     |    |     |       |                | 90     | OCT                |
| 2014 | Gharbiya <sup>50</sup>        | Italy       | CS     |                           |       | •     |     |        |       |    | •   |    |     |       |                | 42     | SD-OCT             |
| 2014 | Polo <sup>51</sup>            | Spain       | CS     | •                         |       |       |     |        |       |    |     |    |     |       |                | 140    | OCT                |
| 2015 | Bambo <sup>1</sup>            | Spain       | CS     |                           |       | •     |     |        |       |    |     |    |     |       |                | 112    | OCT                |
| 2015 | Bayhan <sup>52</sup>          | Turkey      | CS     |                           |       |       | •   |        |       |    | •   |    |     |       | • <sup>1</sup> | 61     | SD-OCT             |
| 2015 | Feke <sup>19</sup>            | USA         | CS     |                           |       | •     |     |        |       |    |     |    |     | •     |                | 52     | Laser Doppler, OCT |
| 2015 | Gao <sup>53</sup>             | China       | CS     |                           |       | •     |     |        |       | •  |     |    |     |       |                | 72     | OCT                |
| 2015 | Gunes <sup>54</sup>           | Turkey      | CC     |                           |       | •     |     |        |       |    |     |    |     |       |                | 80     | SD-OCT             |
| 2015 | Jentsch <sup>21</sup>         | Germany     | CS     |                           |       | •     |     |        |       | •  |     |    |     |       | • <sup>2</sup> | 16     | OCT, FLIO          |
| 2015 | Oktem <sup>55</sup>           | Turkey      | CS     | •                         |       |       |     |        |       |    |     |    |     |       |                | 105    | OCT                |
| 2015 | Salobrar-Garcia <sup>56</sup> | Spain       | CS     |                           | •     | •     |     |        |       |    |     |    |     |       |                | 51     | OCT                |
| 2015 | Shi <sup>57</sup>             | China       | L      | •                         |       |       |     |        |       |    |     |    |     |       |                | 78     | OCT                |
| 2016 | Choi <sup>42</sup>            | Korea       | L      |                           |       | •     |     | •      |       | •  |     |    |     |       |                | 134    | OCT                |
| 2016 | Cunha <sup>26</sup>           | Brazil      | CS     |                           | •     | •     | •   | •      |       | •  |     |    |     |       |                | 48     | OCT                |
| 2016 | Garcia-Martin <sup>58</sup>   | Spain       | CS     | •                         |       |       | •   |        |       |    |     |    |     |       |                | 225    | OCT                |
| 2016 | Knoll <sup>59</sup>           | USA         | CS     |                           |       | •     |     | •      | •     |    |     |    |     |       |                | 34     | SD-OCT             |
| 2016 | Pillai <sup>60</sup>          | USA         | CS     | •                         |       |       | •   |        |       | •  |     |    |     |       |                | 106    | SD-OCT             |
| 2016 | Trebbastoni <sup>27</sup>     | Rome        | CS     |                           |       | •     |     |        |       |    |     |    |     |       |                | 72     | SD-OCT             |
| 2017 | Ferrari <sup>61</sup>         | Italy       | CS     |                           |       | •     |     | •      |       |    |     |    |     |       |                | 93     | OCT                |
| 2017 | Mendez-Gomez <sup>38</sup>    | France      | L      |                           |       | •     |     |        |       |    |     |    |     |       |                | 427    | SD-OCT             |
| 2018 | Bulut <sup>6</sup>            | Turkey      | CS     |                           |       |       |     |        |       | •  | •   | •  | •   |       |                | 52     | OCTA               |
| 2018 | Jiang <sup>62</sup>           | USA         | CS     |                           |       |       |     | •      |       |    | •   | •  | •   |       |                | 52     | OCTA, OCT          |
| 2018 | Lahme <sup>63</sup>           | Germany     | CS     |                           |       |       |     |        |       |    | •   | •  | •   |       |                | 74     | OCTA               |
| 2018 | Shao <sup>64</sup>            | USA         | CS     | •                         |       |       |     |        | •     |    |     |    |     |       |                | 70     | SD-OCT             |
| 2018 | Uchida <sup>65</sup>          | USA         | CS     |                           |       |       |     |        |       |    |     |    |     |       | • <sup>3</sup> | 124    | OCT                |
| 2019 | Almeida <sup>13</sup>         | Brazil      | CS     |                           | •     | •     | •   | •      |       | •  |     |    |     |       |                | 47     | SS-OCT             |
| 2019 | Cipollini <sup>66</sup>       | Italy       | CS     |                           |       | •     | •   |        |       | •  |     |    |     |       |                | 42     | SD-OCT             |
| 2019 | Haan <sup>22</sup>            | Netherlands | CS     |                           |       | •     | •   |        |       | •  |     |    |     |       | • <sup>3</sup> | 142    | SD-OCT             |
| 2019 | Haan <sup>67</sup>            | Netherlands | CS     |                           |       |       |     |        |       | •  | •   | •  |     |       |                | 86     | FP, SD-OCT, OCTA   |
| 2019 | Kim <sup>68</sup>             | South Korea | CS     | •                         |       |       |     |        | •     | •  |     |    |     |       |                | 47     | OCT                |
| 2019 | Salobrar-Garcia <sup>28</sup> | Spain       | CS     |                           |       | •     | •   |        | •     |    |     |    |     |       | • <sup>4</sup> | 90     | OCT                |
| 2019 | Tao <sup>29</sup>             | China       | CS     |                           |       | •     | •   |        |       |    |     |    |     |       |                | 191    | OCT                |
| 2019 | Yoon <sup>23</sup>            | USA         | CS     | •                         |       |       |     |        | •     |    | •   | •  | •   |       |                | 209    | OCTA, SD-OCT       |

21

|    |      |                              |             |        |    |   |    |    |    |    |   |    |    |   |   |       |                |
|----|------|------------------------------|-------------|--------|----|---|----|----|----|----|---|----|----|---|---|-------|----------------|
| 1  | 2019 | Zhang <sup>69</sup>          | USA         | CC     |    |   |    |    |    |    |   |    |    |   |   | 32    | OCT, OCTA      |
| 2  | 2020 | Ashimatey <sup>70</sup>      | USA         | CS     |    |   |    |    |    |    |   |    |    |   |   | 111   | OCTA           |
| 3  | 2020 | Chua <sup>71</sup>           | Singapore   | CS     |    |   |    |    |    |    |   |    |    |   |   | 90    | OCTA           |
| 4  | 2020 | Crisuolo <sup>33</sup>       | Italy       | CS     | •  |   |    |    |    |    |   |    |    |   |   | 83    | SD-OCT, OCTA   |
| 5  | 2020 | Jindhra <sup>72</sup>        | Thailand    | CS     | •  |   |    |    |    |    |   |    |    |   |   | 58    | OCT            |
| 6  | 2020 | Jorge <sup>73</sup>          | Portugal    | CS     |    |   |    |    |    |    |   |    |    |   |   | 41    | OCT            |
| 7  | 2020 | Karakahya <sup>40</sup>      | Germany     | RCT; L | •  |   |    |    |    |    |   |    |    |   |   | 93    | OCT            |
| 8  | 2020 | Lemmens <sup>74</sup>        | Belgium     | CS     | •  |   |    |    |    |    |   |    |    |   |   | 39    | OCT            |
| 9  | 2020 | Mammadova <sup>24</sup>      | USA         | CS     | •  |   |    |    |    |    |   |    |    |   |   | 20    | SD-OCT         |
| 10 | 2020 | Marque <sup>41</sup>         | Spain       | L      | •  |   |    |    |    |    |   |    |    |   |   | 129   | OCT            |
| 11 | 2020 | Mavilio <sup>75</sup>        | Italy       | CS     | •  |   |    |    |    |    |   |    |    |   |   | 52    | OCT            |
| 12 | 2020 | Salobra-Garcia <sup>76</sup> | Switzerland | CS     |    |   |    |    |    |    |   |    |    |   |   | 32    | OCT, OCTA      |
| 13 | 2020 | Sanchez <sup>31</sup>        | Spain       | CS     | •  |   |    |    |    |    |   |    |    |   |   | 930   | OCT            |
| 14 | 2020 | Sen <sup>77</sup>            | India       | CS     | •  |   |    |    |    |    |   |    |    |   |   | 60    | OCT            |
| 15 | 2020 | Uchida <sup>78</sup>         | USA         | CS     |    |   |    |    |    |    |   |    |    |   |   | 64    | OCT            |
| 16 | 2020 | Van De Kreeke <sup>32</sup>  | Netherlands | CS     | •  |   |    |    |    |    |   |    |    |   |   | 298   | OCT, FP        |
| 17 | 2020 | Wu <sup>79</sup>             | China       | CS     |    |   |    |    |    |    |   |    |    |   |   | 60    | OCTA           |
| 18 | 2021 | Biscetti <sup>80</sup>       | Italy       | CS     |    |   |    |    |    |    |   |    |    |   |   | 37    | OCT, OCTA      |
| 19 | 2021 | Janez-Garcia <sup>30</sup>   | Spain       | CS     | •  | • | •  | •  | •  |    |   |    |    |   |   | 43    | OCT<br>OCTA    |
| 20 | 2021 | Li <sup>81</sup>             | China       | CS     |    |   |    |    |    |    |   |    |    |   |   | 71    | OCT            |
| 21 | 2021 | Mei <sup>82</sup>            | China       | CS     | •  |   |    |    |    |    |   |    |    |   |   | 39    | OCTA           |
| 22 | 2021 | Robbins <sup>83</sup>        | USA         | CS     | •  |   |    |    |    |    |   |    |    |   |   | 122   | OCTA           |
| 23 | 2021 | Robbins <sup>84</sup>        | USA         | CS     |    |   |    |    |    |    |   |    |    |   |   | 278   | OCT            |
| 24 | 2021 | Wang <sup>85</sup>           | China       | CS     |    |   |    |    |    |    |   |    |    |   |   | 158   | OCTA, FP       |
| 25 | 2021 | Wong <sup>86</sup>           | Hong Kong   | CS     |    |   |    |    |    |    |   |    |    |   |   | 40    | OCTA           |
| 26 | 2021 | Zabel <sup>87</sup>          | Poland      | CS     | •  | • | •  | •  |    |    |   |    |    |   |   | 108   | SD-OCT<br>OCTA |
| 27 | 2021 | Zhao <sup>88</sup>           | China       | CS     |    | • |    |    |    |    |   |    |    |   |   | 59    | OCT            |
| 28 | 2022 | Montorio <sup>89</sup>       | Italy       | CS     | •  |   |    |    |    |    |   |    |    |   |   | 108   | SD-OCT<br>OCTA |
| 29 |      |                              |             | Total  | 29 | 5 | 23 | 22 | 17 | 14 | 9 | 12 | 15 | 6 | 9 | 6,415 |                |

Design abbreviations: CC=case-control, C=cross-sectional, L=longitudinal, RCT=randomised controlled trial.

Retinal markers abbreviations: CSF=central subfield retinal thickness; CT= Choroidal thickness; FAZ=foveal avascular zone; FD, fractal dimension; GCC=macular ganglion cell complex; GC-IPL= ganglion cell-inner plexiform layer; mRNFL=macula retinal nerve fibre layer; MT/MV=macular volume/macular thickness; pRNFL=peripapillary retinal nerve fibre layer; RNFL= retinal nerve fibre layer; RVN=retinal vasculature network; VD=vascular/vessel density (including CC-VLD, choriocapillaris plexus vessel length density; CC-VPD, choriocapillaris plexus vessel perfusion density; DCP-VLD, deep capillary plexus vessel length density; DCP-VPD, deep capillary plexus vessel perfusion density; ICP-VLD, intermediate capillary plexus vessel length density; ICP-VPD, intermediate capillary plexus vessel perfusion density).

Footnotes: <sup>1</sup> Focal loss volume and global loss volume; <sup>2</sup> Time-resolved autofluorescence of the retina by FLIO; <sup>3</sup>Retinal thickness/volume, mean foveal thickness and juxtafoveal thickness; <sup>4</sup> <sup>13</sup>IPL, INL, OPL; retinal pigment epithelium (RPE) thickness.

**Table 2.** Study characteristics of cognitive assessment and score (n=67).

| Year | Author                        | Mean age of individuals with AD <sup>1</sup> | Mean age of controls | No. of cognitively impaired subjects <sup>2</sup> |                   | Measure | Mean cognitive score                    |                                         |                                        |
|------|-------------------------------|----------------------------------------------|----------------------|---------------------------------------------------|-------------------|---------|-----------------------------------------|-----------------------------------------|----------------------------------------|
|      |                               |                                              |                      | MCI                                               | AD                |         | Controls                                | MCI                                     | AD                                     |
| 2001 | Parisi <sup>45</sup>          | 70.4                                         | -                    | -                                                 | 17                | MMSE    | 23                                      | -                                       | 16.4                                   |
| 2006 | Iseri <sup>46</sup>           | 70.1                                         | 65.1                 | -                                                 | 14                | MMSE    | 29.4                                    | -                                       | 18.5                                   |
| 2011 | Kesler <sup>47</sup>          | 73.7                                         | 70.9                 | 24                                                | 30                | MMSE    | -                                       | 28.1                                    | 23.6                                   |
| 2013 | Kirbas <sup>48</sup>          | 69.3                                         | 68.9                 | -                                                 | 40                | MMSE    | 28.7                                    | -                                       | 21.2                                   |
| 2013 | Shen <sup>37</sup>            | -                                            | 74.1                 | 18 <sup>5</sup>                                   | -                 | MMSE    | At 25 months:27.7                       | At 25 months: 24.6                      | -                                      |
| 2014 | Ascaso <sup>49</sup>          | 72.1                                         | 72.9                 | 21                                                | 18                | MMSE    | 28.8                                    | -                                       | 19.3                                   |
| 2014 | Gharbiya <sup>50</sup>        | 73.1                                         | 70.3                 | -                                                 | 21                | MMSE    | 28.2                                    | -                                       | 22.2                                   |
| 2014 | Polo <sup>51</sup>            | 74.2                                         | 74.0                 | -                                                 | 70                | MMSE    | -                                       | -                                       | 16.0                                   |
| 2015 | Bambo <sup>1</sup>            | 74.0                                         | 76.4                 | -                                                 | 56                | MMSE    | -                                       | -                                       | 16.6                                   |
| 2015 | Bayhan <sup>52</sup>          | 75.8                                         | 74.9                 | -                                                 | 31                | MMSE    | 29.3                                    | -                                       | 17.4                                   |
| 2015 | Feke <sup>19</sup>            | 74.3                                         | 69.1                 | 21                                                | 10                | CDR     | 0.0                                     | 0.5                                     | 1.0 or 2.0                             |
| 2015 | Gao <sup>53</sup>             | 74.7                                         | 72.1                 | 26                                                | 25                | MMSE    | 28.6                                    | 25.8                                    | 19.2                                   |
| 2015 | Gunes <sup>54</sup>           | 75.0                                         | 74.2                 | -                                                 | 40                | MMSE    | -                                       | -                                       | 21.9                                   |
| 2015 | Jentsch <sup>21</sup>         | 77.2                                         | -                    | -                                                 | 16                | MMSE    | -                                       | -                                       | 24.0                                   |
| 2015 | Oktem <sup>55</sup>           | 75.4                                         | 70.2                 | 35                                                | 35                | MMSE    | 29.0                                    | 28.0                                    | 18.0                                   |
| 2015 | Salobrar-Garcia <sup>56</sup> | 79.3                                         | 72.3                 | -                                                 | 23                | MMSE    | 28.2                                    | -                                       | 23.3                                   |
| 2015 | Shi <sup>57</sup>             | -                                            | 74.1                 | 18 <sup>5</sup>                                   | -                 | MMSE    | At baseline: 28.0<br>At 25 months: 28.0 | At baseline: 27.0<br>At 25 months: 24.0 | -                                      |
| 2016 | Choi <sup>42</sup>            | 76.8                                         | 73.8                 | 26                                                | 42                | MMSE    | -                                       | 23.1                                    | 14.1                                   |
| 2016 | Cunha <sup>26</sup>           | 74.8                                         | 72.3                 | -                                                 | 24                | MMSE    | 29.1                                    | -                                       | 17.0                                   |
| 2016 | Garcia-Martin <sup>58</sup>   | 75.3                                         | 74.8                 | -                                                 | 150               | MMSE    | 29.8                                    | -                                       | 18.4                                   |
| 2016 | Knoll <sup>59</sup>           | -                                            | 74.0                 | 17                                                | -                 | MMSE    | 29.0                                    | 27.0                                    | -                                      |
| 2016 | Pillai <sup>60</sup>          | 65.8                                         | 65.1                 | 21                                                | 21 <sup>4,6</sup> | MoCA    | 26.6                                    | 21.2                                    | 16.0                                   |
| 2016 | Trebbastoni <sup>27</sup>     | 72.0                                         | 71.7                 | -                                                 | 36                | MMSE    | At baseline: 28.6<br>At 12 months: 28.5 | -                                       | At baseline: 22.7<br>At 12 months:17.9 |
| 2017 | Ferrari <sup>61</sup>         | 71.3                                         | 68.3                 | 29.0                                              | 37 <sup>7</sup>   | MMSE    | -                                       | 26.6                                    | 16.6                                   |
| 2017 | Mendez-Gomez <sup>38</sup>    | -                                            | N/A                  | -                                                 | -                 | MMSE    | 27.8                                    | -                                       | -                                      |
| 2018 | Bulut <sup>6</sup>            | 74.2                                         | 72.6                 | -                                                 | 26                | MMSE    | 26.8                                    | -                                       | 16.9                                   |
| 2018 | Jiang <sup>62</sup>           | 73.3                                         | 67.6                 | 19                                                | 12                | MMSE    | 29.5                                    | 25.7                                    | 19.9                                   |
| 2018 | Lahme <sup>63</sup>           | 68.0                                         | 66.1                 | -                                                 | 36                | MMSE    | -                                       | -                                       | 22.3                                   |
| 2018 | Shao <sup>64</sup>            | 74.0                                         | 68.0                 | 24                                                | 25                | MMSE    | 29.0                                    | 28.0                                    | 22.0                                   |
| 2018 | Uchida <sup>65</sup>          | 65.3                                         | 65.1                 | 22                                                | 24 <sup>4,6</sup> | MoCA    | 26.6                                    | 20.9                                    | 14.7                                   |
| 2019 | Almeida <sup>13</sup>         | -                                            | 64.6                 | 23                                                | -                 | MMSE    | -                                       | 27.9                                    | -                                      |
| 2019 | Cipollini <sup>66</sup>       | 74.0                                         | 70.0                 | -                                                 | 25                | MMSE    | 29.2                                    | -                                       | 24.2                                   |
| 2019 | Haan <sup>22</sup>            | 65.0                                         | 67.9                 | -                                                 | 57                | MMSE    | 29.0                                    | -                                       | 22.0                                   |
| 2019 | Haan <sup>67</sup>            | 65.4                                         | 60.6                 | -                                                 | 48                | MMSE    | 29.0                                    | -                                       | 23.0                                   |
| 2019 | Kim <sup>68</sup>             | 74.2                                         | 73.6                 | 14                                                | 16                | MMSE    | -                                       | 24.2                                    | 12.1                                   |
| 2019 | Salobrar-Garcia <sup>28</sup> | -                                            | -                    | -                                                 | 50                | MMSE    | 28.6                                    | -                                       | 19.9                                   |
| 2019 | Tao <sup>29</sup>             | 71.4                                         | 68.9                 | 51                                                | 73                | MMSE    | 28.7                                    | 28.3                                    | 19.7                                   |
| 2019 | Yoon <sup>23</sup>            | 72.8                                         | 69.2                 | 37                                                | 39                | MMSE    | 29.2                                    | 22.6                                    | 20.1                                   |

23

|    |      |                              |                    |                           |                 |                  |          |                                  |                    |                          |
|----|------|------------------------------|--------------------|---------------------------|-----------------|------------------|----------|----------------------------------|--------------------|--------------------------|
| 1  | 2019 | Zhang <sup>69</sup>          | 73.0               | 73.6                      | 13              | 3                | MoCA     | 27.1                             | -                  | 20.3                     |
| 2  | 2020 | Ashimatey <sup>70</sup>      | -                  | 68.4                      | -               | 15 <sup>8</sup>  | MoCA     | 23.0                             | -                  | 20.0                     |
| 3  | 2020 | Chua <sup>71</sup>           | 74.9               | 76.7                      | 37              | 24               | MMSE     | 24.8                             | 23.9               | 20.3                     |
| 4  | 2020 | Criscuolo <sup>33</sup>      | -                  | 73.1                      | 54              | -                | MMSE     | 28.0                             | 26.5               | -                        |
| 5  | 2020 | Jindahra <sup>72</sup>       | 75.6               | 75.8                      | 29              | 29               | MoCA     | 26.6                             | -                  | 14.5                     |
| 6  | 2020 | Jorge <sup>73</sup>          | 65.3               | 66.3                      | -               | 20               | MoCA     | 24.9                             | -                  | 14.4                     |
| 7  | 2020 | Karakahya <sup>40</sup>      | 76.8               | 77.2                      | -               | 13               | MMSE     | 28.2                             | -                  | 21.0                     |
| 8  | 2020 | Lemmens <sup>74</sup>        | 71.9               | 68.6                      | -               | 17               | MMSE     | 29.3                             | -                  | 17.6                     |
| 9  | 2020 | Mammadova <sup>24</sup>      | -                  | N/A                       | N/A             | N/A              | MMSE     | 29.2                             | -                  | -                        |
| 10 | 2020 | Marquie <sup>41</sup>        | -                  | 65.8                      | 15              | -                | MMSE     | At follow-up: 29.3 <sup>10</sup> | At follow-up: 28.3 | -                        |
| 11 | 2020 | Mavilio <sup>75</sup>        | 71.2               | 69.1                      | 16              | 17               | MMSE     | 27.1                             | 25.1               | 24.8                     |
| 12 | 2020 | Sanchez <sup>31</sup>        | 79.0               | 66.0                      | 192             | 324              | MMSE     | 29.3                             | 25.1               | 20.3                     |
| 13 | 2020 | Santangelo <sup>34</sup>     | 70.9               | 69.4                      | 37              | 43               | MMSE     | -                                | 24.9               | 19.0                     |
| 14 | 2020 | Salobar-Garcia <sup>76</sup> | -                  | -                         | -               | 17               | MMSE     | 30.0                             | -                  | 26.0                     |
| 15 | 2020 | Sen <sup>77</sup>            | 61.5               | 60.9                      | -               | 40               | MMSE     | 28.0                             | -                  | 17.5                     |
| 16 | 2020 | Uchida <sup>78</sup>         | 64.7               | 65.1                      | -               | 14               | MoCA     | 27.0                             | -                  | 15.5                     |
| 17 |      |                              |                    |                           |                 |                  | WMS-IV   | 30.5                             | -                  | 14.0                     |
| 18 |      |                              |                    |                           |                 |                  | HVLT-R   | 23.5                             | -                  | 12.0                     |
| 19 |      |                              |                    |                           |                 |                  | PVF      | 40.0                             | -                  | 26.0                     |
| 20 |      |                              |                    |                           |                 |                  | SVF      | 21.0                             | -                  | 8.0                      |
| 21 | 2020 | Van De Kreeke <sup>32</sup>  | 91.9 <sup>12</sup> | 70.4 / 92.4 <sup>13</sup> | -               | 23 <sup>12</sup> | MMSE     | 29.0 <sup>13</sup>               | -                  | 24.0                     |
| 22 | 2020 | Wu <sup>79</sup>             | 69.9               | 69.0                      | 21              | 19               | MMSE     | 27.1                             | 24.8               | 19.7                     |
| 23 | 2021 | Biscetti <sup>80</sup>       | 72.1               | 73.6                      | 24 <sup>9</sup> | -                | MMSE     | 28.9                             | 25.9               | -                        |
| 24 | 2021 | Janez-Carcia <sup>30</sup>   | 79.2               | 75.7                      | -               | 19               | MMSE     | 28.38                            | -                  | 23.4                     |
| 25 | 2021 | Li <sup>81</sup>             | 83.1               | 79.7                      | -               | 37               | MMSE     | 29.1                             | -                  | 7.9                      |
| 26 |      |                              |                    |                           |                 |                  | ADAS-cog | 3.0                              | -                  | 48.4                     |
| 27 |      |                              |                    |                           |                 |                  | CDR      | 0                                | -                  | 2.54                     |
| 28 | 2021 | Mei <sup>82</sup>            | 73.8               | 74.3                      | -               | 19               | MMSE     | 28.1                             | -                  | 12.8                     |
| 29 | 2021 | Robbins <sup>83</sup>        | 62.4               | 68.1                      | -               | 15               | MMSE     | 29.3                             | -                  | 19.36/21.6 <sup>11</sup> |
| 30 | 2021 | Robbins <sup>84</sup>        | 72.8               | 69.2                      | 74              | 67               | MMSE     | 29.0                             | 24.5               | 19.8                     |
| 31 | 2021 | Wang <sup>85</sup>           | 71.8               | 69.5                      | 47              | 62               | MMSE     | 28.7                             | 28.0               | 19.9                     |
| 32 |      |                              |                    |                           |                 |                  | CDR      | 0.03                             | 0.5                | 1.3                      |
| 33 | 2021 | Wong <sup>86</sup>           | 64.9 <sup>14</sup> | 64.5                      | 11              | -                | MoCA     | 26.9                             | 22.8               | -                        |
| 34 | 2021 | Zabel <sup>87</sup>          | 74.4               | 71.4                      | -               | 31               | MMSE     | 29                               | -                  | 20.5                     |
| 35 | 2021 | Zhao <sup>88</sup>           | 70.2               | 66.6                      | 23              | 17               | MMSE     | 28.8                             | 26.9               | 21.2                     |
| 36 |      |                              |                    |                           |                 |                  | MoCA     | 24.9                             | 20.6               | 15.7                     |
| 37 |      |                              |                    |                           |                 |                  | ADAS-cog | 14.2                             | 18.0               | 31.9                     |
| 38 | 2022 | Monotorio <sup>89</sup>      | -                  | 72.7                      | 54              | -                | MMSE     | 28.4                             | 26.5               | -                        |

<sup>1</sup> Mean age of AD group reported only; <sup>2</sup> Other groups studied listed in footnotes; <sup>3</sup> Lewy Body Dementia;; <sup>5</sup> Converted (converted from normal cognition to MCI or MCI to dementia); <sup>6</sup> non-AD dementia; <sup>7</sup> Frontotemporal Dementia; <sup>8</sup> Cognitively abnormal; <sup>9</sup> Both MCI and AD were included. <sup>10</sup> Subjective cognitive decline, no baseline data available. <sup>11</sup> MMSE scores for early onset AD and late-onset AD. <sup>12</sup> Cognitively impaired nonagenarians. <sup>13</sup> Two control groups, one for 65+ and the other for 90+. <sup>14</sup> Reported mean for both control groups.

Abbreviations: AFT=Animal Fluency Test; CDR= clinical dementia rating; CFT=Complex Figure Test; HVLT-R=Hopkins Verbal Learning Test-Revised; MMSE=Mini-Mental State Examination; MoCA=Montreal Cognitive Assessment; PVF=Phonemic verbal fluency; SCWT=Stroop Colour Word Test; SVF=Semantic verbal fluency; TMT= Trial Making Test; WMS-IV=Wechsler Memory Scale-Fourth Edition.

**Table 3.** Associations between diagnosed dementia status (e.g., AD) and retinal markers.

| Year | Author                       | Method              | Areas of retina measured |       |       |     |        |            |    |    |     |       |                  |
|------|------------------------------|---------------------|--------------------------|-------|-------|-----|--------|------------|----|----|-----|-------|------------------|
|      |                              |                     | RNFL                     | mRNFL | pRNFL | GCC | GC-IPL | MT         | CT | VD | FAZ | Other |                  |
| 2001 | Paris <sup>45</sup>          | OCT                 | ✗                        | -     | -     | -   | -      | -          | -  | -  | -   | -     | -                |
| 2006 | Iseri <sup>46</sup>          | OCT                 | ✗                        | -     | -     | -   | -      | -          | ✓  | -  | -   | -     | ✗ <sub>1</sub>   |
| 2011 | Kesler <sup>47</sup>         | OCT                 | ✗                        | -     | -     | -   | -      | -          | -  | -  | -   | -     | -                |
| 2013 | Kirbas <sup>48</sup>         | SD-OCT              | ✗                        | -     | ✗     | -   | -      | -          | -  | -  | -   | -     | -                |
| 2013 | Shen <sup>37</sup>           | OCT                 | ✓                        | -     | -     | -   | -      | -          | -  | -  | -   | -     | -                |
| 2014 | Ascaso <sup>49</sup>         | OCT                 | ✓                        | -     | -     | -   | -      | -          | ✗  | -  | -   | -     | -                |
| 2014 | Gharbiya <sup>50</sup>       | SD-OCT              | -                        | -     | ✗     | -   | -      | -          | -  | ✗  | -   | -     | ✗ <sub>2</sub>   |
| 2014 | Polo <sup>51</sup>           | OCT                 | ✗                        | -     | -     | -   | -      | -          | -  | -  | -   | -     | -                |
| 2015 | Bambo <sup>1</sup>           | OCT                 | -                        | -     | ?     | -   | -      | -          | -  | -  | -   | -     | ✗ <sub>3</sub>   |
| 2015 | Bayhan <sup>52</sup>         | SD-OCT              | -                        | -     | -     | ✓   | -      | -          | -  | ✗  | -   | -     | -                |
| 2015 | Feke <sup>19</sup>           | Laser Doppler / OCT | -                        | -     | -     | -   | -      | -          | -  | -  | -   | -     | ✓ <sub>4</sub>   |
| 2015 | Gao <sup>53</sup>            | OCT                 | -                        | -     | ✗     | -   | -      | -          | -  | -  | -   | -     | -                |
| 2015 | Gunes <sup>54</sup>          | SD-OCT              | -                        | -     | ✗     | -   | -      | -          | -  | -  | -   | -     | -                |
| 2015 | Jentsch <sup>21</sup>        | OCT / FLIO          | -                        | -     | ✗     | -   | -      | -          | -  | -  | -   | -     | ? <sup>5</sup>   |
| 2015 | Oktem <sup>55</sup>          | OCT                 | ✓                        | -     | -     | -   | -      | -          | -  | -  | -   | -     | -                |
| 2015 | Salobar-Garcia <sup>56</sup> | OCT                 | -                        | ?     | ✗     | -   | -      | -          | -  | -  | -   | -     | ✓ <sub>1,6</sub> |
| 2015 | Shi <sup>57</sup>            | OCT                 | ✓                        | -     | -     | -   | -      | -          | -  | -  | -   | -     | -                |
| 2016 | Choi <sup>42</sup>           | OCT                 | -                        | -     | ✗     | -   | -      | ?          | ?  | -  | -   | -     | -                |
| 2016 | Cunha <sup>26</sup>          | OCT                 | -                        | ✓     | ✓     | ✓   | ✓      | ✓          | ✓  | -  | -   | -     | ✓ <sub>7</sub>   |
| 2016 | Garcia-Martin <sup>58</sup>  | OCT                 | ✓                        | -     | -     | ✓   | -      | -          | -  | -  | -   | -     | -                |
| 2016 | Knoll <sup>59</sup>          | SD-OCT              | -                        | -     | ?     | -   | -      | -          | -  | -  | -   | -     | -                |
| 2016 | Pillai <sup>60</sup>         | SD-OCT              | ✗                        | -     | -     | -   | -      | -          | -  | -  | -   | -     | -                |
| 2016 | Trebbastoni <sup>27</sup>    | SD-OCT              | -                        | -     | ✓     | -   | -      | -          | -  | -  | -   | -     | -                |
| 2017 | Ferrari <sup>61</sup>        | OCT                 | -                        | -     | ✗     | -   | -      | AD ✓ MCI ✗ | -  | -  | -   | -     | -                |
| 2017 | Mendez-Gomez <sup>38</sup>   | SD-OCT              | -                        | -     | ?     | -   | -      | -          | -  | -  | -   | -     | -                |
| 2018 | Bulut <sup>6</sup>           | OCTA                | -                        | -     | -     | -   | -      | -          | -  | ✓  | ✓   | ✓     | ✗ <sub>8,9</sub> |
| 2018 | Jiang <sup>62</sup>          | OCTA / OCT          | -                        | -     | -     | -   | -      | -          | -  | -  | -   | -     | ? <sup>10</sup>  |
| 2018 | Lahme <sup>63</sup>          | OCTA                | -                        | -     | -     | -   | -      | -          | -  | -  | -   | -     | ✓ <sub>11</sub>  |
| 2018 | Shao <sup>64</sup>           | SD-OCT              | ✓                        | -     | -     | -   | -      | ✓          | -  | -  | -   | -     | -                |
| 2018 | Uchida <sup>65</sup>         | OCT                 | -                        | -     | -     | -   | -      | -          | -  | -  | -   | -     | ✓ <sub>12</sub>  |
| 2019 | Almeida <sup>13</sup>        | SS-OCT              | -                        | ✗     | ✓     | ✓   | ✓      | ✓          | ?  | -  | -   | -     | -                |
| 2019 | Cipollini <sup>66</sup>      | SD-OCT              | -                        | -     | ✗     | ✗   | -      | -          | ✗  | -  | -   | -     | -                |
| 2019 | Haan <sup>22</sup>           | SD-OCT              | -                        | -     | ✗     | -   | -      | -          | ✗  | -  | -   | -     | -                |
| 2019 | Haan <sup>67</sup>           | SD-OCT / OCTA       | -                        | -     | -     | -   | -      | -          | -  | ✗  | ✗   | ✗     | -                |
| 2019 | Kim <sup>68</sup>            | OCT                 | ?                        | -     | -     | -   | -      | ?          | ✓  | -  | -   | -     | -                |

25

|    |      |                               |               |       |     |      |      |                 |      |     |      |                     |                     |
|----|------|-------------------------------|---------------|-------|-----|------|------|-----------------|------|-----|------|---------------------|---------------------|
| 1  | 2019 | Salobrar-Garcia <sup>28</sup> | OCT           | -     | -   | ✓    | -    | -               | ✓    | -   | -    | -                   | -                   |
| 2  | 2019 | Tao <sup>29</sup>             | OCT           | -     | -   | ✓    | ✗    | -               | -    | -   | -    | -                   | -                   |
| 3  | 2019 | Yoon <sup>23</sup>            | OCTA / SD-OCT | ✓     | -   | -    | -    | ✓               | -    | -   | ?    | ✗                   | ✗ <sup>14, 15</sup> |
| 4  | 2019 | Zhang <sup>69</sup>           | OCT / OCTA    | -     | -   | -    | -    | -               | -    | -   | ?    | -                   | -                   |
| 5  | 2020 | Ashimatey <sup>70</sup>       | OCTA          | -     | -   | -    | -    | -               | -    | -   | ✓    | -                   | -                   |
| 6  | 2020 | Chua <sup>71</sup>            | OCT           | -     | -   | -    | -    | -               | -    | -   | ✓    | ✓                   | -                   |
| 7  | 2020 | Criscuolo <sup>33</sup>       | SD-OCT / OCTA | ✗     | -   | -    | ✗    | -               | -    | -   | -    | -                   | -                   |
| 8  | 2020 | Jindahra <sup>65</sup>        | OCT           | ✓     | -   | -    | -    | ✓               | -    | -   | -    | -                   | -                   |
| 9  | 2020 | Jorge <sup>73</sup>           | OCT           | -     | -   | -    | -    | ✗               | -    | -   | -    | -                   | -                   |
| 10 | 2020 | Karakahya <sup>40</sup>       | OCT           | ✓     | -   | -    | -    | ✓               | -    | ✓   | -    | -                   | -                   |
| 11 | 2020 | Lemmens <sup>74</sup>         | OCT           | ✓     | -   | -    | -    | -               | -    | -   | -    | -                   | -                   |
| 12 | 2020 | Mammadova <sup>24</sup>       | SD-OCT        | ✓     | -   | -    | -    | -               | -    | -   | -    | -                   | -                   |
| 13 | 2020 | Marque <sup>41</sup>          | OCT           | ✗     | -   | -    | ✗    | -               | -    | -   | -    | -                   | -                   |
| 14 | 2020 | Mavilio <sup>75</sup>         | OCT           | ✗     | -   | -    | ✗    | -               | -    | -   | -    | -                   | -                   |
| 15 | 2020 | Salobra-Garcia <sup>76</sup>  | OCT, OCTA     | -     | -   | -    | -    | -               | -    | ✓   | -    | ✗                   | ✗                   |
| 16 | 2020 | Sanchez <sup>31</sup>         | OCT           | ✗     | -   | -    | ✗    | -               | -    | -   | -    | -                   | ✗                   |
| 17 | 2020 | Santangelo <sup>34</sup>      | OCT           | ✗     | -   | -    | -    | -               | ✓    | -   | -    | -                   | -                   |
| 18 | 2020 | Sen <sup>77</sup>             | OCT           | ✗     | -   | -    | ✗    | -               | -    | -   | -    | -                   | ✗                   |
| 19 | 2020 | Uchida <sup>78</sup>          | OCT           | -     | -   | -    | -    | -               | -    | -   | -    | -                   | ✗                   |
| 20 | 2020 | Van De Kreeke <sup>32</sup>   | OCT           | ✗     | -   | -    | ✗    | ✗               | -    | -   | ✗    | -                   | -                   |
| 21 | 2020 | Wu <sup>79</sup>              | OCTA          | -     | -   | -    | -    | -               | -    | -   | ?    | ?                   | -                   |
| 22 | 2021 | Biscetti <sup>80</sup>        | OCT           | -     | -   | -    | ✗    | ✗               | -    | -   | ✓    | ✗                   | -                   |
| 23 | 2021 | Janez-Garcia <sup>30</sup>    | OCT, OCTA     | ✓     | ✓   | ✓    | ✓    | ✓               | -    | -   | -    | -                   | -                   |
| 24 | 2021 | Lj <sup>81</sup>              | OCT           | -     | -   | -    | -    | -               | -    | ✓   | -    | -                   | -                   |
| 25 | 2021 | Lian                          | OCT           | ✓     | -   | -    | ✓    | -               | -    | -   | -    | -                   | -                   |
| 26 | 2021 | Mei <sup>82</sup>             | OCTA          | ✓     | -   | -    | ✓    | -               | -    | -   | ✓    | -                   | -                   |
| 27 | 2021 | Robbins <sup>83</sup>         | OCTA          | ✗     | -   | -    | -    | ✗               | -    | ✗   | -    | -                   | -                   |
| 28 | 2021 | Robbins <sup>84</sup>         | OCT           | -     | -   | -    | -    | -               | -    | ?   | -    | -                   | -                   |
| 29 | 2021 | Wang <sup>85</sup>            | OCTA          | -     | -   | ✗    | ✗    | -               | -    | -   | ✗    | ✗                   | -                   |
| 30 | 2021 | Wong <sup>86</sup>            | OCTA          | -     | -   | -    | -    | -               | -    | -   | ✓    | -                   | -                   |
| 31 | 2021 | Zabel <sup>87</sup>           | OCT, OCTA     | ✗     | -   | ✗    | ✗    | ✓ <sup>10</sup> | -    | -   | ✓    | ✓ <sup>10, 11</sup> | -                   |
| 32 | 2021 | Zhao <sup>88</sup>            | OCT           | -     | ✓   | -    | -    | -               | -    | -   | -    | -                   | -                   |
| 33 | 2022 | Montorio <sup>89</sup>        | OCTA          | ✓     | -   | -    | ✓    | -               | -    | -   | ✗    | -                   | -                   |
| 34 |      |                               |               | 15/30 | 3/5 | 6/21 | 8/19 | 9/15            | 5/10 | 4/9 | 7/14 | 3/9                 |                     |

<sup>1</sup> Foveal thickness; <sup>2</sup> Retinal CSF thickness; <sup>3</sup> Retinal haemoglobin levels; <sup>4</sup> Retinal blood flow; <sup>5</sup> T2, α2 and Q2 in ch2; <sup>6</sup> Macular volume; <sup>7</sup> GCL++; <sup>8</sup> Choroidal flow rate; <sup>9</sup> Outer retinal flow rate; <sup>10</sup> Superficial vascular plexus, deep vascular plexus and total retinal vascular network; <sup>11</sup> Flow density; <sup>12</sup> Retinal pigment epithelium; <sup>13</sup> Central foveal thickness; <sup>14</sup> Central subfield thickness; <sup>15</sup> Perfusion density; <sup>16</sup> Vessel length density; <sup>17</sup> Adjusted flow index; Vessel perfusion density; <sup>18</sup> Peripapillary Radial Peripapillary Capillary. Key: ✓ = correlation identified; ✗ = no correlation identified; ? = unclear.

26

**Table 4.** Summary of QUADAS score of the 67 included studies.

| Year | Author                        | RS <sup>1</sup> | CSC <sup>2</sup> | ARS <sup>3</sup> | DPB <sup>4</sup> | PVB <sup>5</sup> | DVB <sup>6</sup> | IB <sup>7</sup> | ITE <sup>8</sup> | RSE <sup>9</sup> | ITRB <sup>10</sup> | RSRB <sup>11</sup> | CRB <sup>12</sup> | UTRR <sup>13</sup> | WE <sup>14</sup> | Total |
|------|-------------------------------|-----------------|------------------|------------------|------------------|------------------|------------------|-----------------|------------------|------------------|--------------------|--------------------|-------------------|--------------------|------------------|-------|
| 2001 | Parisi <sup>45</sup>          | N               | N                | Y                | U                | U                | U                | Y               | Y                | N                | U                  | U                  | Y                 | Y                  | N                | 5/14  |
| 2006 | Iseri <sup>46</sup>           | N               | Y                | Y                | Y                | Y                | Y                | Y               | Y                | N                | U                  | U                  | Y                 | Y                  | Y                | 10/14 |
| 2011 | Kesler <sup>47</sup>          | N               | Y                | Y                | U                | Y                | Y                | U               | U                | N                | Y                  | Y                  | Y                 | Y                  | Y                | 9/14  |
| 2013 | Kirbas <sup>48</sup>          | N               | Y                | Y                | U                | Y                | Y                | Y               | N                | N                | U                  | U                  | Y                 | Y                  | Y                | 8/14  |
| 2013 | Shen <sup>37</sup>            | N               | Y                | Y                | Y                | Y                | Y                | Y               | Y                | Y                | U                  | U                  | Y                 | Y                  | Y                | 11/14 |
| 2014 | Ascaso <sup>49</sup>          | N               | Y                | Y                | Y                | Y                | Y                | Y               | Y                | Y                | N                  | Y                  | Y                 | Y                  | N                | 11/14 |
| 2014 | Gharbiya <sup>50</sup>        | N               | Y                | Y                | Y                | Y                | Y                | Y               | Y                | N                | Y                  | Y                  | Y                 | Y                  | Y                | 13/14 |
| 2014 | Polo <sup>51</sup>            | N               | Y                | Y                | Y                | Y                | Y                | Y               | Y                | Y                | Y                  | Y                  | Y                 | Y                  | Y                | 13/14 |
| 2015 | Bambo <sup>1</sup>            | N               | Y                | Y                | U                | Y                | Y                | Y               | Y                | Y                | U                  | U                  | Y                 | Y                  | Y                | 10/14 |
| 2015 | Bayhan <sup>52</sup>          | N               | Y                | Y                | Y                | Y                | Y                | Y               | Y                | Y                | Y                  | Y                  | Y                 | Y                  | Y                | 13/14 |
| 2015 | Feke <sup>19</sup>            | N               | Y                | Y                | U                | Y                | Y                | Y               | Y                | N                | U                  | U                  | Y                 | Y                  | Y                | 10/14 |
| 2015 | Gao <sup>53</sup>             | N               | Y                | Y                | Y                | Y                | Y                | Y               | Y                | Y                | Y                  | Y                  | Y                 | Y                  | Y                | 13/14 |
| 2015 | Gunes <sup>54</sup>           | N               | Y                | Y                | Y                | Y                | Y                | Y               | N                | N                | U                  | U                  | Y                 | Y                  | Y                | 9/14  |
| 2015 | Jentsch <sup>21</sup>         | N               | Y                | Y                | U                | U                | Y                | Y               | Y                | Y                | U                  | U                  | Y                 | Y                  | Y                | 9/14  |
| 2015 | Oktem <sup>55</sup>           | N               | N                | Y                | Y                | Y                | Y                | Y               | N                | Y                | U                  | U                  | Y                 | Y                  | Y                | 9/14  |
| 2015 | Shi <sup>57</sup>             | N               | Y                | Y                | Y                | Y                | Y                | Y               | Y                | Y                | U                  | U                  | Y                 | Y                  | Y                | 11/14 |
| 2015 | Solabrar-Garcia <sup>56</sup> | N               | Y                | Y                | U                | Y                | Y                | Y               | Y                | N                | U                  | U                  | Y                 | Y                  | Y                | 9/14  |
| 2016 | Choi <sup>42</sup>            | N               | Y                | Y                | Y                | Y                | Y                | Y               | Y                | Y                | U                  | U                  | Y                 | Y                  | Y                | 12/14 |
| 2016 | Cunha <sup>26</sup>           | N               | Y                | Y                | Y                | Y                | Y                | Y               | Y                | Y                | U                  | U                  | Y                 | Y                  | Y                | 11/14 |
| 2016 | Garcia-Martin <sup>58</sup>   | N               | Y                | Y                | Y                | Y                | Y                | Y               | Y                | Y                | Y                  | Y                  | Y                 | Y                  | Y                | 13/14 |
| 2016 | Knoll <sup>59</sup>           | N               | Y                | Y                | Y                | Y                | Y                | Y               | Y                | Y                | N                  | Y                  | Y                 | Y                  | Y                | 12/14 |
| 2016 | Pillai <sup>60</sup>          | N               | Y                | Y                | Y                | Y                | Y                | Y               | Y                | Y                | U                  | U                  | Y                 | Y                  | Y                | 11/14 |
| 2016 | Trebbastoni <sup>27</sup>     | N               | Y                | Y                | Y                | Y                | Y                | Y               | Y                | Y                | U                  | U                  | Y                 | Y                  | Y                | 11/14 |
| 2017 | Ferrari <sup>61</sup>         | N               | Y                | Y                | U                | Y                | Y                | Y               | Y                | N                | U                  | U                  | Y                 | Y                  | Y                | 9/14  |
| 2017 | Mendez-Gomez <sup>38</sup>    | N               | N                | Y                | Y                | Y                | Y                | Y               | Y                | Y                | U                  | U                  | Y                 | Y                  | Y                | 10/14 |
| 2018 | Bulut <sup>6</sup>            | N               | Y                | Y                | Y                | Y                | Y                | Y               | Y                | Y                | U                  | U                  | Y                 | Y                  | Y                | 11/14 |
| 2018 | Jiang <sup>62</sup>           | N               | Y                | Y                | U                | Y                | Y                | Y               | Y                | N                | U                  | U                  | U                 | N                  | N                | 6/14  |
| 2018 | Lahme <sup>63</sup>           | N               | Y                | Y                | U                | Y                | Y                | Y               | Y                | N                | U                  | U                  | Y                 | Y                  | Y                | 9/14  |
| 2018 | Shao <sup>64</sup>            | N               | Y                | Y                | Y                | Y                | Y                | Y               | Y                | Y                | Y                  | U                  | U                 | Y                  | Y                | 11/14 |
| 2018 | Uchida <sup>65</sup>          | N               | Y                | Y                | Y                | Y                | Y                | Y               | Y                | Y                | U                  | U                  | Y                 | Y                  | Y                | 11/14 |
| 2019 | Almeida <sup>13</sup>         | N               | Y                | Y                | Y                | Y                | Y                | Y               | Y                | Y                | U                  | Y                  | Y                 | Y                  | Y                | 12/14 |
| 2019 | Cipollini <sup>66</sup>       | N               | Y                | Y                | U                | Y                | Y                | Y               | Y                | Y                | U                  | U                  | Y                 | Y                  | Y                | 10/14 |
| 2019 | Haan <sup>22</sup>            | N               | Y                | Y                | Y                | Y                | Y                | Y               | Y                | Y                | Y                  | Y                  | Y                 | Y                  | Y                | 13/14 |
| 2019 | Haan <sup>67</sup>            | N               | Y                | Y                | Y                | Y                | Y                | Y               | Y                | Y                | Y                  | Y                  | Y                 | Y                  | Y                | 13/14 |
| 2019 | Kim <sup>68</sup>             | N               | Y                | Y                | Y                | Y                | Y                | Y               | Y                | Y                | Y                  | Y                  | Y                 | Y                  | Y                | 13/14 |
| 2019 | Solabrar-Garcia <sup>28</sup> | N               | Y                | Y                | Y                | Y                | Y                | Y               | Y                | Y                | U                  | U                  | Y                 | Y                  | Y                | 11/14 |
| 2019 | Tao <sup>29</sup>             | N               | Y                | Y                | N                | Y                | Y                | Y               | Y                | N                | U                  | U                  | Y                 | Y                  | Y                | 9/14  |
| 2019 | Yoon <sup>23</sup>            | N               | Y                | Y                | Y                | Y                | Y                | Y               | Y                | Y                | U                  | U                  | Y                 | Y                  | Y                | 11/14 |
| 2019 | Zhang <sup>69</sup>           | N               | Y                | Y                | Y                | Y                | Y                | Y               | Y                | Y                | Y                  | Y                  | Y                 | Y                  | Y                | 13/14 |
| 2020 | Ashimatey <sup>70</sup>       | N               | Y                | Y                | U                | Y                | Y                | Y               | Y                | Y                | Y                  | Y                  | Y                 | Y                  | Y                | 12/14 |

27



|    |      |                               |   |   |   |   |   |   |   |   |   |   |   |   |   |       |
|----|------|-------------------------------|---|---|---|---|---|---|---|---|---|---|---|---|---|-------|
| 1  | 2020 | Chua <sup>71</sup>            | N | Y | Y | Y | Y | Y | Y | Y | Y | Y | Y | Y | Y | 13/14 |
| 2  | 2020 | Criscuolo <sup>33</sup>       | N | Y | Y | U | Y | Y | Y | Y | U | U | Y | Y | Y | 10/14 |
| 3  | 2020 | Jindahra <sup>72</sup>        | N | Y | Y | Y | Y | Y | Y | Y | Y | Y | Y | Y | Y | 13/14 |
| 4  | 2020 | Jorge <sup>73</sup>           | N | Y | Y | U | Y | Y | Y | Y | Y | Y | Y | Y | Y | 12/14 |
| 5  | 2020 | Karakahya <sup>40</sup>       | N | Y | Y | Y | Y | Y | Y | Y | Y | Y | Y | Y | Y | 13/14 |
| 6  | 2020 | Lemmens <sup>74</sup>         | N | Y | Y | Y | Y | Y | Y | Y | U | U | Y | Y | Y | 11/14 |
| 7  | 2020 | Mammadova <sup>24</sup>       | N | Y | Y | Y | Y | Y | Y | Y | U | U | Y | Y | Y | 11/14 |
| 8  | 2020 | Marguie <sup>41</sup>         | N | Y | Y | Y | Y | Y | Y | Y | Y | Y | Y | Y | Y | 13/14 |
| 9  | 2020 | Mavilio <sup>75</sup>         | N | Y | Y | Y | Y | Y | Y | Y | Y | Y | Y | Y | Y | 13/14 |
| 10 | 2020 | Sanchez <sup>31</sup>         | N | Y | Y | Y | Y | Y | Y | Y | Y | Y | Y | Y | Y | 13/14 |
| 11 | 2020 | Santangelo <sup>34</sup>      | N | Y | Y | U | Y | Y | Y | N | U | U | Y | Y | Y | 9/14  |
| 12 | 2020 | Salobrar-Garcia <sup>76</sup> | N | Y | Y | Y | Y | Y | Y | Y | Y | Y | Y | Y | Y | 13/14 |
| 13 | 2020 | Sen <sup>77</sup>             | N | Y | Y | Y | Y | Y | Y | N | Y | Y | Y | Y | Y | 12/14 |
| 14 | 2020 | Uchida <sup>78</sup>          | N | Y | Y | Y | Y | Y | Y | Y | Y | Y | Y | Y | Y | 13/14 |
| 15 | 2020 | Van De Kreeke <sup>32</sup>   | N | Y | Y | Y | U | Y | Y | N | U | U | Y | Y | Y | 9/14  |
| 16 | 2020 | Wu <sup>79</sup>              | N | Y | Y | Y | Y | Y | Y | Y | U | U | Y | Y | Y | 11/14 |
| 17 | 2021 | Biscetti <sup>80</sup>        | N | Y | Y | Y | Y | Y | Y | Y | U | U | Y | Y | Y | 11/14 |
| 18 | 2021 | Janez-Garcia <sup>30</sup>    | N | U | Y | Y | Y | Y | Y | Y | Y | Y | Y | Y | Y | 13/14 |
| 19 | 2021 | Lj <sup>81</sup>              | N | Y | Y | Y | Y | Y | Y | N | U | U | Y | Y | Y | 10/14 |
| 20 | 2021 | Mej <sup>82</sup>             | N | Y | Y | U | Y | Y | Y | N | U | U | Y | Y | Y | 9/14  |
| 21 | 2021 | Robbins <sup>83</sup>         | N | Y | Y | Y | Y | Y | Y | Y | Y | Y | Y | Y | Y | 13/14 |
| 22 | 2021 | Robbins <sup>84</sup>         | N | Y | Y | Y | Y | Y | Y | Y | U | U | Y | Y | Y | 11/14 |
| 23 | 2021 | Wang <sup>85</sup>            | N | Y | Y | Y | Y | Y | Y | Y | Y | Y | Y | Y | Y | 13/14 |
| 24 | 2021 | Wong <sup>86</sup>            | N | Y | Y | Y | Y | Y | Y | N | Y | Y | Y | Y | Y | 12/14 |
| 25 | 2021 | Zabel <sup>87</sup>           | N | Y | Y | Y | Y | Y | Y | Y | Y | Y | Y | Y | Y | 13/14 |
| 26 | 2021 | Zhao <sup>88</sup>            | N | Y | Y | Y | Y | Y | Y | Y | Y | Y | Y | Y | Y | 13/14 |
| 27 | 2022 | Montorio <sup>89</sup>        | N | Y | Y | Y | Y | Y | Y | Y | Y | Y | Y | Y | Y | 13/14 |

Y: Yes (green); N: No (red); U: unknown (yellow)

<sup>1</sup>Representative spectrum, <sup>2</sup>Clear selection criteria, <sup>3</sup>Accurate reference standard, <sup>4</sup>Disease progression bias, <sup>5</sup>Partial verification bias, <sup>6</sup>Differential verification bias, <sup>7</sup>Incorporation bias, <sup>8</sup>Index test execution well described, <sup>9</sup>Reference standard execution well described, <sup>10</sup>Index test review bias, <sup>11</sup>Reference standard review bias, <sup>12</sup>Clinical review bias, <sup>13</sup>Uninterpretable results reported, <sup>14</sup>Withdrawals explained.

## References

1. Bambo MP, Garcia-Martin E, Gutierrez-Ruiz F, et al. Analysis of optic disk color changes in Alzheimer's disease: a potential new biomarker. *Clin Neurol Neurosurg* 2015;132:68-73. doi: 10.1016/j.clineuro.2015.02.016 [published Online First: 2015/03/24]
2. Yoon SP, Thompson AC, Polascik BW, et al. Correlation of OCTA and Volumetric MRI in Mild Cognitive Impairment and Alzheimer's Disease. *Ophthalmic Surg Lasers Imaging Retina* 2019;50(11):709-18. doi: 10.3928/23258160-20191031-06 [published Online First: 2019/11/23]
3. Dementia Australia. Dementia Statistics: Dementia Australia; 2014 [Available from: <https://www.dementia.org.au/statistics2022>].
4. Villemagne VL, Burnham S, Bourgeat P, et al. Amyloid  $\beta$  deposition, neurodegeneration, and cognitive decline in sporadic Alzheimer's disease: a prospective cohort study. *Lancet Neurol* 2013;12(4):357-67. doi: 10.1016/s1474-4422(13)70044-9 [published Online First: 20130308]
5. Dementia Australia. Early diagnosis of dementia: Dementia Australia; 2014 [Available from: <https://www.dementia.org.au/information/diagnosing-dementia/early-diagnosis-of-dementia2022>].
6. Bulut M, Kurtuluş F, Gözkaya O, et al. Evaluation of optical coherence tomography angiographic findings in Alzheimer's type dementia. *Br J Ophthalmol* 2018;102(2):233-37. doi: 10.1136/bjophthalmol-2017-310476 [published Online First: 2017/06/11]
7. Dementia Australia. Early warning signs: Dementia Australia; 2015 [Available from: <https://www.dementia.org.au/about-dementia/health-professionals/dementia-the-essentials/early-warning-signs2022>].
8. Ong YT, Hilal S, Cheung CY, et al. Retinal neurodegeneration on optical coherence tomography and cerebral atrophy. *Neurosci Lett* 2015;584:12-6. doi: 10.1016/j.neulet.2014.10.010 [published Online First: 2014/12/03]
9. Nestor SM, Rupsingh R, Borrie M, et al. Ventricular enlargement as a possible measure of Alzheimer's disease progression validated using the Alzheimer's disease neuroimaging initiative database. *Brain* 2008;131(Pt 9):2443-54. doi: 10.1093/brain/awn146 [published Online First: 2008/08/02]
10. Adhi M, Duker JS. Optical coherence tomography--current and future applications. *Curr Opin Ophthalmol* 2013;24(3):213-21. doi: 10.1097/ICU.0b013e32835f8bf8 [published Online First: 2013/02/23]
11. Ito Y, Sasaki M, Takahashi H, et al. Quantitative Assessment of the Retina Using OCT and Associations with Cognitive Function. *Ophthalmology* 2020;127(1):107-18. doi: 10.1016/j.ophtha.2019.05.021 [published Online First: 2019/07/17]
12. Thomson KL, Yeo JM, Waddell B, et al. A systematic review and meta-analysis of retinal nerve fiber layer change in dementia, using optical coherence tomography. *Alzheimers Dement (Amst)* 2015;1(2):136-43. doi: 10.1016/j.dadm.2015.03.001 [published Online First: 2016/05/31]
13. Almeida ALM, Pires LA, Figueiredo EA, et al. Correlation between cognitive impairment and retinal neural loss assessed by swept-source optical coherence tomography in patients with mild cognitive impairment. *Alzheimers Dement (Amst)* 2019;11:659-69. doi: 10.1016/j.dadm.2019.08.006 [published Online First: 2019/11/02]
14. Wang M, Zhu Y, Shi Z, et al. Meta-analysis of the relationship of peripheral retinal nerve fiber layer thickness to Alzheimer's disease and mild cognitive impairment. *Shanghai Arch Psychiatry* 2015;27(5):263-79. doi: 10.11919/j.issn.1002-0829.215100 [published Online First: 2016/03/16]
15. Chan VTT, Sun Z, Tang S, et al. Spectral-Domain OCT Measurements in Alzheimer's Disease: A Systematic Review and Meta-analysis. *Ophthalmology* 2019;126(4):497-510. doi: 10.1016/j.ophtha.2018.08.009 [published Online First: 2018/08/17]
16. Mejia-Vergara AJ, Restrepo-Jimenez P, Pelak VS. Optical Coherence Tomography in Mild Cognitive Impairment: A Systematic Review and Meta-Analysis. *Front Neurol* 2020;11:578698. doi: 10.3389/fneur.2020.578698 [published Online First: 2020/11/13]
17. Ge YJ, Xu W, Ou YN, et al. Retinal biomarkers in Alzheimer's disease and mild cognitive impairment: A systematic review and meta-analysis. *Ageing Res Rev* 2021;69:101361. doi: 10.1016/j.arr.2021.101361 [published Online First: 2021/05/18]
18. Whiting P, Rutjes AW, Reitsma JB, et al. The development of QUADAS: a tool for the quality assessment of studies of diagnostic accuracy included in systematic reviews. *BMC Med Res Methodol* 2003;3:25. doi: 10.1186/1471-2288-3-25 [published Online First: 2003/11/11]

19. Feke GT, Hyman BT, Stern RA, et al. Retinal blood flow in mild cognitive impairment and Alzheimer's disease. *Alzheimers Dement (Amst)* 2015;1(2):144-51. doi: 10.1016/j.dadm.2015.01.004 [published Online First: 2016/05/31]
20. Dysli C, Wolf S, Berezin MY, et al. Fluorescence lifetime imaging ophthalmoscopy. *Prog Retin Eye Res* 2017;60:120-43. doi: 10.1016/j.preteyeres.2017.06.005 [published Online First: 2017/07/05]
21. Jentsch S, Schweitzer D, Schmidtke KU, et al. Retinal fluorescence lifetime imaging ophthalmoscopy measures depend on the severity of Alzheimer's disease. *Acta Ophthalmol* 2015;93(4):e241-7. doi: 10.1111/aos.12609 [published Online First: 2014/12/09]
22. den Haan J, van de Kreeke JA, van Berckel BN, et al. Is retinal vasculature a biomarker in amyloid proven Alzheimer's disease? *Alzheimers Dement (Amst)* 2019;11:383-91. doi: 10.1016/j.dadm.2019.03.006 [published Online First: 2019/06/14]
23. Yoon SP, Grewal DS, Thompson AC, et al. Retinal Microvascular and Neurodegenerative Changes in Alzheimer's Disease and Mild Cognitive Impairment Compared with Control Participants. *Ophthalmol Retina* 2019;3(6):489-99. doi: 10.1016/j.oret.2019.02.002 [published Online First: 2019/06/09]
24. Mammadova N, Nepl TK, Denburg NL, et al. Reduced Retinal Thickness Predicts Age-Related Changes in Cognitive Function. *Front Aging Neurosci* 2020;12:81. doi: 10.3389/fnagi.2020.00081 [published Online First: 2020/04/10]
25. Song A, Johnson N, Ayala A, et al. Optical Coherence Tomography in Patients with Alzheimer's Disease: What Can It Tell Us? *Eye Brain* 2021;13:1-20. doi: 10.2147/eb.S235238 [published Online First: 2021/01/16]
26. Cunha LP, Lopes LC, Costa-Cunha LV, et al. Macular Thickness Measurements with Frequency Domain-OCT for Quantification of Retinal Neural Loss and its Correlation with Cognitive Impairment in Alzheimer's Disease. *PLoS One* 2016;11(4):e0153830. doi: 10.1371/journal.pone.0153830 [published Online First: 2016/04/23]
27. Trebbastoni A, D'Antonio F, Bruscolini A, et al. Retinal nerve fibre layer thickness changes in Alzheimer's disease: Results from a 12-month prospective case series. *Neurosci Lett* 2016;629:165-70. doi: 10.1016/j.neulet.2016.07.006 [published Online First: 2016/07/11]
28. Salobar-García E, de Hoz R, Ramírez AI, et al. Changes in visual function and retinal structure in the progression of Alzheimer's disease. *PLoS One* 2019;14(8):e0220535. doi: 10.1371/journal.pone.0220535 [published Online First: 2019/08/16]
29. Tao R, Lu Z, Ding D, et al. Perifovea retinal thickness as an ophthalmic biomarker for mild cognitive impairment and early Alzheimer's disease. *Alzheimers Dement (Amst)* 2019;11:405-14. doi: 10.1016/j.dadm.2019.04.003 [published Online First: 2019/06/18]
30. Jáñez-García L, Bachtoula O, Salobar-García E, et al. Roughness of retinal layers in Alzheimer's disease. *Sci Rep* 2021;11(1):11804. doi: 10.1038/s41598-021-91097-3 [published Online First: 2021/06/05]
31. Sánchez D, Castilla-Martí M, Marquí M, et al. Evaluation of macular thickness and volume tested by optical coherence tomography as biomarkers for Alzheimer's disease in a memory clinic. *Sci Rep* 2020;10(1):1580. doi: 10.1038/s41598-020-58399-4 [published Online First: 2020/02/02]
32. van de Kreeke JA, Legdeur N, Badissi M, et al. Ocular biomarkers for cognitive impairment in nonagenarians; a prospective cross-sectional study. *BMC Geriatr* 2020;20(1):155. doi: 10.1186/s12877-020-01556-1 [published Online First: 2020/04/30]
33. Crisculo C, Cennamo G, Montorio D, et al. Assessment of retinal vascular network in amnesic mild cognitive impairment by optical coherence tomography angiography. *PLoS One* 2020;15(6):e0233975. doi: 10.1371/journal.pone.0233975 [published Online First: 2020/06/04]
34. Santangelo R, Huang SC, Bernasconi MP, et al. Neuro-Retina Might Reflect Alzheimer's Disease Stage. *J Alzheimers Dis* 2020;77(4):1455-68. doi: 10.3233/jad-200043 [published Online First: 2020/09/15]
35. Costa-Cunha LV, Cunha LP, Malta RF, et al. Comparison of Fourier-domain and time-domain optical coherence tomography in the detection of band atrophy of the optic nerve. *Am J Ophthalmol* 2009;147(1):56-63.e2. doi: 10.1016/j.ajo.2008.07.020 [published Online First: 2008/09/09]
36. Mitchell AJ. A meta-analysis of the accuracy of the mini-mental state examination in the detection of dementia and mild cognitive impairment. *J Psychiatr Res* 2009;43(4):411-31. doi: 10.1016/j.jpsychires.2008.04.014 [published Online First: 2008/06/27]
37. Shen Y, Shi Z, Jia R, et al. The attenuation of retinal nerve fiber layer thickness and cognitive deterioration. *Front Cell Neurosci* 2013;7:142. doi: 10.3389/fncel.2013.00142 [published Online First: 2013/09/26]
38. Méndez-Gómez JL, Rougier MB, Tellouck L, et al. Peripapillary Retinal Nerve Fiber Layer Thickness and the Evolution of Cognitive Performance in an Elderly Population. *Front Neurol* 2017;8:93. doi: 10.3389/fneur.2017.00093 [published Online First: 2017/04/05]

39. Shi Z, Zhu Y, Wang M, et al. The Utilization of Retinal Nerve Fiber Layer Thickness to Predict Cognitive Deterioration. *J Alzheimers Dis* 2016;49(2):399-405. doi: 10.3233/jad-150438 [published Online First: 2015/10/21]
40. Karakahya RH, Özcan T. Salvage of the retinal ganglion cells in transition phase in Alzheimer's disease with topical coenzyme Q10: is it possible? *Graefes Arch Clin Exp Ophthalmol* 2020;258(2):411-18. doi: 10.1007/s00417-019-04544-3 [published Online First: 2019/11/30]
41. Marquié M, Valero S, Castilla-Martí M, et al. Association between retinal thickness and  $\beta$ -amyloid brain accumulation in individuals with subjective cognitive decline: Fundació ACE Healthy Brain Initiative. *Alzheimers Res Ther* 2020;12(1):37. doi: 10.1186/s13195-020-00602-9 [published Online First: 2020/04/03]
42. Choi SH, Park SJ, Kim NR. Macular Ganglion Cell -Inner Plexiform Layer Thickness Is Associated with Clinical Progression in Mild Cognitive Impairment and Alzheimers Disease. *PLoS One* 2016;11(9):e0162202. doi: 10.1371/journal.pone.0162202 [published Online First: 2016/09/07]
43. Ding J, Patton N, Deary IJ, et al. Retinal microvascular abnormalities and cognitive dysfunction: a systematic review. *Br J Ophthalmol* 2008;92(8):1017-25. doi: 10.1136/bjo.2008.141994 [published Online First: 2008/07/11]
44. Heringa SM, Bouvy WH, van den Berg E, et al. Associations between retinal microvascular changes and dementia, cognitive functioning, and brain imaging abnormalities: a systematic review. *J Cereb Blood Flow Metab* 2013;33(7):983-95. doi: 10.1038/jcbfm.2013.58 [published Online First: 2013/04/18]
45. Parisi V, Restuccia R, Fattapposta F, et al. Morphological and functional retinal impairment in Alzheimer's disease patients. *Clin Neurophysiol* 2001;112(10):1860-7. doi: 10.1016/s1388-2457(01)00620-4 [published Online First: 2001/10/12]
46. Iseri PK, Altınış O, Tokay T, et al. Relationship between cognitive impairment and retinal morphological and visual functional abnormalities in Alzheimer disease. *J Neuroophthalmol* 2006;26(1):18-24. doi: 10.1097/01.wno.0000204645.56873.26 [published Online First: 2006/03/07]
47. Kesler A, Vakhapova V, Korczyn AD, et al. Retinal thickness in patients with mild cognitive impairment and Alzheimer's disease. *Clin Neurol Neurosurg* 2011;113(7):523-6. doi: 10.1016/j.clineuro.2011.02.014 [published Online First: 2011/04/02]
48. Kirbas S, Turkyilmaz K, Anlar O, et al. Retinal nerve fiber layer thickness in patients with Alzheimer disease. *J Neuroophthalmol* 2013;33(1):58-61. doi: 10.1097/WNO.0b013e318267fd5f [published Online First: 2012/08/25]
49. Ascaso FJ, Cruz N, Modrego PJ, et al. Retinal alterations in mild cognitive impairment and Alzheimer's disease: an optical coherence tomography study. *J Neurol* 2014;261(8):1522-30. doi: 10.1007/s00415-014-7374-z [published Online First: 2014/05/23]
50. Gharbiya M, Trebbastoni A, Parisi F, et al. Choroidal thinning as a new finding in Alzheimer's disease: evidence from enhanced depth imaging spectral domain optical coherence tomography. *J Alzheimers Dis* 2014;40(4):907-17. doi: 10.3233/jad-132039 [published Online First: 2014/03/01]
51. Polo V, Garcia-Martin E, Bambo MP, et al. Reliability and validity of Cirrus and Spectralis optical coherence tomography for detecting retinal atrophy in Alzheimer's disease. *Eye (Lond)* 2014;28(6):680-90. doi: 10.1038/eye.2014.51 [published Online First: 2014/03/15]
52. Bayhan HA, Aslan Bayhan S, Celikbilek A, et al. Evaluation of the chorioretinal thickness changes in Alzheimer's disease using spectral-domain optical coherence tomography. *Clin Exp Ophthalmol* 2015;43(2):145-51. doi: 10.1111/ceo.12386 [published Online First: 2014/07/06]
53. Gao L, Liu Y, Li X, et al. Abnormal retinal nerve fiber layer thickness and macula lutea in patients with mild cognitive impairment and Alzheimer's disease. *Arch Gerontol Geriatr* 2015;60(1):162-7. doi: 10.1016/j.archger.2014.10.011 [published Online First: 2014/12/03]
54. Güneş A, Demirci S, Tök L, et al. Evaluation of retinal nerve fiber layer thickness in Alzheimer disease using spectral-domain optical coherence tomography. *Turk J Med Sci* 2015;45(5):1094-7. [published Online First: 2016/01/08]
55. Oktem EO, Derle E, Kibaroglu S, et al. The relationship between the degree of cognitive impairment and retinal nerve fiber layer thickness. *Neurol Sci* 2015;36(7):1141-6. doi: 10.1007/s10072-014-2055-3 [published Online First: 2015/01/13]
56. Salobarra-Garcia E, Hoyas I, Leal M, et al. Analysis of Retinal Peripapillary Segmentation in Early Alzheimer's Disease Patients. *Biomed Res Int* 2015;2015:636548. doi: 10.1155/2015/636548 [published Online First: 2015/11/12]

57. Shi Z, Wu Y, Wang M, et al. Greater attenuation of retinal nerve fiber layer thickness in Alzheimer's disease patients. *J Alzheimers Dis* 2014;40(2):277-83. doi: 10.3233/jad-131898 [published Online First: 2014/01/15]
58. Garcia-Martin E, Bambo MP, Marques ML, et al. Ganglion cell layer measurements correlate with disease severity in patients with Alzheimer's disease. *Acta Ophthalmol* 2016;94(6):e454-9. doi: 10.1111/aos.12977 [published Online First: 2016/02/21]
59. Knoll B, Simonett J, Volpe NJ, et al. Retinal nerve fiber layer thickness in amnesic mild cognitive impairment: Case-control study and meta-analysis. *Alzheimers Dement (Amst)* 2016;4:85-93. doi: 10.1016/j.dadm.2016.07.004 [published Online First: 2016/10/11]
60. Pillai JA, Bermel R, Bonner-Jackson A, et al. Retinal Nerve Fiber Layer Thinning in Alzheimer's Disease: A Case-Control Study in Comparison to Normal Aging, Parkinson's Disease, and Non-Alzheimer's Dementia. *Am J Alzheimers Dis Other Demen* 2016;31(5):430-6. doi: 10.1177/1533317515628053 [published Online First: 2016/02/19]
61. Ferrari L, Huang SC, Magnani G, et al. Optical Coherence Tomography Reveals Retinal Neuroaxonal Thinning in Frontotemporal Dementia as in Alzheimer's Disease. *J Alzheimers Dis* 2017;56(3):1101-07. doi: 10.3233/jad-160886 [published Online First: 2017/01/21]
62. Jiang H, Wei Y, Shi Y, et al. Altered Macular Microvasculature in Mild Cognitive Impairment and Alzheimer Disease. *J Neuroophthalmol* 2018;38(3):292-98. doi: 10.1097/wno.0000000000000580 [published Online First: 2017/10/19]
63. Lahme L, Esser EL, Mihailovic N, et al. Evaluation of Ocular Perfusion in Alzheimer's Disease Using Optical Coherence Tomography Angiography. *J Alzheimers Dis* 2018;66(4):1745-52. doi: 10.3233/jad-180738 [published Online First: 2018/12/07]
64. Shao Y, Jiang H, Wei Y, et al. Visualization of Focal Thinning of the Ganglion Cell-Inner Plexiform Layer in Patients with Mild Cognitive Impairment and Alzheimer's Disease. *J Alzheimers Dis* 2018;64(4):1261-73. doi: 10.3233/jad-180070 [published Online First: 2018/07/25]
65. Uchida A, Pillai JA, Bermel R, et al. Outer Retinal Assessment Using Spectral-Domain Optical Coherence Tomography in Patients With Alzheimer's and Parkinson's Disease. *Invest Ophthalmol Vis Sci* 2018;59(7):2768-77. doi: 10.1167/iovs.17-23240 [published Online First: 2018/06/04]
66. Cipollini V, Abdolrahimzadeh S, Troili F, et al. Neurocognitive Assessment and Retinal Thickness Alterations in Alzheimer Disease: Is There a Correlation? *J Neuroophthalmol* 2020;40(3):370-77. doi: 10.1097/wno.0000000000000831 [published Online First: 2019/08/28]
67. den Haan J, van de Kreeke JA, Konijnenberg E, et al. Retinal thickness as a potential biomarker in patients with amyloid-proven early- and late-onset Alzheimer's disease. *Alzheimers Dement (Amst)* 2019;11:463-71. doi: 10.1016/j.dadm.2019.05.002 [published Online First: 2019/06/30]
68. Kim JI, Kang BH. Decreased retinal thickness in patients with Alzheimer's disease is correlated with disease severity. *PLoS One* 2019;14(11):e0224180. doi: 10.1371/journal.pone.0224180 [published Online First: 2019/11/07]
69. Zhang YS, Zhou N, Knoll BM, et al. Parafoveal vessel loss and correlation between peripapillary vessel density and cognitive performance in amnesic mild cognitive impairment and early Alzheimer's Disease on optical coherence tomography angiography. *PLoS One* 2019;14(4):e0214685. doi: 10.1371/journal.pone.0214685 [published Online First: 2019/04/03]
70. Ashimatey BS, D'Orazio LM, Ma SJ, et al. Lower retinal capillary density in minimal cognitive impairment among older Latinx adults. *Alzheimers Dement (Amst)* 2020;12(1):e12071. doi: 10.1002/dad2.12071 [published Online First: 20200825]
71. Chua J, Hu Q, Ke M, et al. Retinal microvasculature dysfunction is associated with Alzheimer's disease and mild cognitive impairment. *Alzheimers Res Ther* 2020;12(1):161. doi: 10.1186/s13195-020-00724-0 [published Online First: 2020/12/06]
72. Jindahra P, Hengsiri N, Witoonpanich P, et al. Evaluation of Retinal Nerve Fiber Layer and Ganglion Cell Layer Thickness in Alzheimer's Disease Using Optical Coherence Tomography. *Clin Ophthalmol* 2020;14:2995-3000. doi: 10.2147/ophth.S276625 [published Online First: 2020/10/17]
73. Jorge L, Canário N, Martins R, et al. The Retinal Inner Plexiform Synaptic Layer Mirrors Grey Matter Thickness of Primary Visual Cortex with Increased Amyloid  $\beta$  Load in Early Alzheimer's Disease. *Neural Plast* 2020;2020:8826087. doi: 10.1155/2020/8826087 [published Online First: 2020/10/06]
74. Lemmens S, Van Craenendonck T, Van Eijgen J, et al. Combination of snapshot hyperspectral retinal imaging and optical coherence tomography to identify Alzheimer's disease patients. *Alzheimers Res Ther* 2020;12(1):144. doi: 10.1186/s13195-020-00715-1 [published Online First: 2020/11/12]

- 1 75. Mavilio A, Sisto D, Prete F, et al. RE-PERG in early-onset Alzheimer's disease: A double-blind, electrophysiological  
2 pilot study. *PLoS One* 2020;15(8):e0236568. doi: 10.1371/journal.pone.0236568 [published Online First:  
3 2020/08/14]
- 4 76. Salobar-Garcia E, Méndez-Hernández C, Hoz R, et al. Ocular Vascular Changes in Mild Alzheimer's Disease  
5 Patients: Foveal Avascular Zone, Choroidal Thickness, and ONH Hemoglobin Analysis. *J Pers Med* 2020;10(4)  
6 doi: 10.3390/jpm10040231 [published Online First: 2020/11/19]
- 7 77. Sen S, Saxena R, Vibha D, et al. Detection of structural and electrical disturbances in macula and optic nerve in  
8 Alzheimer's patients and their correlation with disease severity. *Semin Ophthalmol* 2020;35(2):116-25. doi:  
9 10.1080/08820538.2020.1748203 [published Online First: 2020/04/21]
- 10 78. Uchida A, Pillai JA, Bermel R, et al. Correlation between brain volume and retinal photoreceptor outer segment  
11 volume in normal aging and neurodegenerative diseases. *PLoS One* 2020;15(9):e0237078. doi:  
12 10.1371/journal.pone.0237078 [published Online First: 2020/09/04]
- 13 79. Wu J, Zhang X, Azhati G, et al. Retinal microvascular attenuation in mental cognitive impairment and Alzheimer's  
14 disease by optical coherence tomography angiography. *Acta Ophthalmol* 2020;98(6):e781-e87. doi:  
15 10.1111/aos.14381 [published Online First: 2020/03/11]
- 16 80. Biscetti L, Lupidi M, Luchetti E, et al. Novel noninvasive biomarkers of prodromal Alzheimer disease: The role of  
17 optical coherence tomography and optical coherence tomography-angiography. *Eur J Neurol*  
18 2021;28(7):2185-91. doi: 10.1111/ene.14871 [published Online First: 2021/04/15]
- 19 81. Li M, Li R, Lyu JH, et al. Relationship Between Alzheimer's Disease and Retinal Choroidal Thickness: A Cross-  
20 Sectional Study. *J Alzheimers Dis* 2021;80(1):407-19. doi: 10.3233/jad-201142 [published Online First:  
21 2021/02/09]
- 22 82. Mei X, Qiu C, Zhou Q, et al. Changes in retinal multilayer thickness and vascular network of patients with  
23 Alzheimer's disease. *Biomed Eng Online* 2021;20(1):97. doi: 10.1186/s12938-021-00931-2 [published Online  
24 First: 2021/10/05]
- 25 83. Robbins CB, Grewal DS, Stinnett SS, et al. Assessing the Retinal Microvasculature in Individuals With Early and  
26 Late-Onset Alzheimer's Disease. *Ophthalmic Surg Lasers Imaging Retina* 2021;52(6):336-44. doi:  
27 10.3928/23258160-20210528-06 [published Online First: 2021/06/30]
- 28 84. Robbins CB, Grewal DS, Thompson AC, et al. Choroidal Structural Analysis in Alzheimer Disease, Mild Cognitive  
29 Impairment, and Cognitively Healthy Controls. *Am J Ophthalmol* 2021;223:359-67. doi:  
30 10.1016/j.ajo.2020.09.049 [published Online First: 2020/10/12]
- 31 85. Wang X, Zhao Q, Tao R, et al. Decreased Retinal Vascular Density in Alzheimer's Disease (AD) and Mild Cognitive  
32 Impairment (MCI): An Optical Coherence Tomography Angiography (OCTA) Study. *Front Aging Neurosci*  
33 2020;12:572484. doi: 10.3389/fnagi.2020.572484 [published Online First: 2021/02/02]
- 34 86. Wong MNK, Lai DWL, Chan HH, et al. Neural and Retinal Characteristics in Relation to Working Memory in Older  
35 Adults with Mild Cognitive Impairment. *Curr Alzheimer Res* 2021;18(3):185-95. doi:  
36 10.2174/1567205018666210608114044 [published Online First: 2021/06/10]
- 37 87. Zabel P, Kaluzny JJ, Zabel K, et al. Quantitative assessment of retinal thickness and vessel density using optical  
38 coherence tomography angiography in patients with Alzheimer's disease and glaucoma. *PLoS One*  
39 2021;16(3):e0248284. doi: 10.1371/journal.pone.0248284 [published Online First: 2021/03/20]
- 40 88. Zhao A, Fang F, Li B, et al. Visual Abnormalities Associate With Hippocampus in Mild Cognitive Impairment and  
41 Early Alzheimer's Disease. *Front Aging Neurosci* 2020;12:597491. doi: 10.3389/fnagi.2020.597491 [published  
42 Online First: 2021/02/09]
- 43 89. Montorio D, Criscuolo C, Breve MA, et al. Radial peripapillary vessel density as early biomarker in preperimetric  
44 glaucoma and amnesic mild cognitive impairment. *Graefes Arch Clin Exp Ophthalmol* 2022 doi:  
45 10.1007/s00417-022-05561-5 [published Online First: 2022/01/23]
- 46  
47  
48  
49  
50  
51  
52  
53  
54  
55  
56  
57  
58  
59  
60

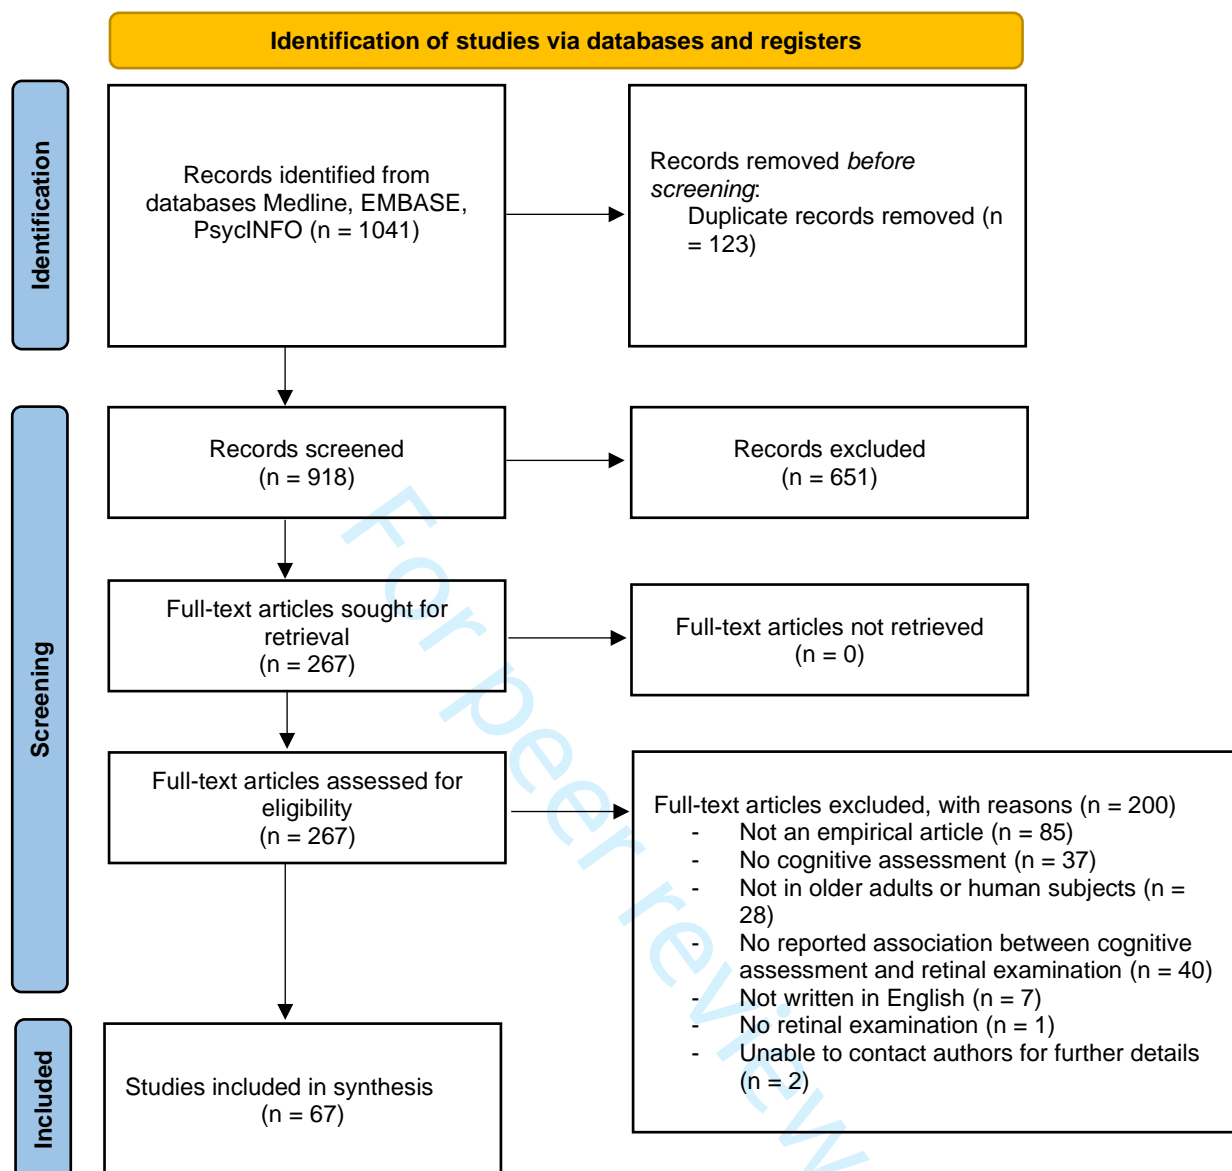

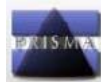

## PRISMA 2020 Checklist

1  
2  
3  
4  
5  
6  
7  
8  
9  
10  
11  
12  
13  
14  
15  
16  
17  
18  
19  
20  
21  
22  
23  
24  
25  
26  
27  
28  
29  
30  
31  
32  
33  
34  
35  
36  
37  
38  
39  
40  
41  
42  
43  
44  
45  
46  
47

| Section and Topic             | Item # | Checklist item                                                                                                                                                                                                                                                                                       | Location where item is reported |
|-------------------------------|--------|------------------------------------------------------------------------------------------------------------------------------------------------------------------------------------------------------------------------------------------------------------------------------------------------------|---------------------------------|
| <b>TITLE</b>                  |        |                                                                                                                                                                                                                                                                                                      |                                 |
| Title                         | 1      | Identify the report as a systematic review.                                                                                                                                                                                                                                                          | 1                               |
| <b>ABSTRACT</b>               |        |                                                                                                                                                                                                                                                                                                      |                                 |
| Abstract                      | 2      | See the PRISMA 2020 for Abstracts checklist.                                                                                                                                                                                                                                                         | 2-3                             |
| <b>INTRODUCTION</b>           |        |                                                                                                                                                                                                                                                                                                      |                                 |
| Rationale                     | 3      | Describe the rationale for the review in the context of existing knowledge.                                                                                                                                                                                                                          | 4-7                             |
| Objectives                    | 4      | Provide an explicit statement of the objective(s) or question(s) the review addresses.                                                                                                                                                                                                               | 7                               |
| <b>METHODS</b>                |        |                                                                                                                                                                                                                                                                                                      |                                 |
| Eligibility criteria          | 5      | Specify the inclusion and exclusion criteria for the review and how studies were grouped for the syntheses.                                                                                                                                                                                          | 8                               |
| Information sources           | 6      | Specify all databases, registers, websites, organisations, reference lists and other sources searched or consulted to identify studies. Specify the date when each source was last searched or consulted.                                                                                            | 9                               |
| Search strategy               | 7      | Present the full search strategies for all databases, registers and websites, including any filters and limits used.                                                                                                                                                                                 | Supplementary                   |
| Selection process             | 8      | Specify the methods used to decide whether a study met the inclusion criteria of the review, including how many reviewers screened each record and each report retrieved, whether they worked independently, and if applicable, details of automation tools used in the process.                     | 9                               |
| Data collection process       | 9      | Specify the methods used to collect data from reports, including how many reviewers collected data from each report, whether they worked independently, any processes for obtaining or confirming data from study investigators, and if applicable, details of automation tools used in the process. | 9                               |
| Data items                    | 10a    | List and define all outcomes for which data were sought. Specify whether all results that were compatible with each outcome domain in each study were sought (e.g. for all measures, time points, analyses), and if not, the methods used to decide which results to collect.                        | 9                               |
|                               | 10b    | List and define all other variables for which data were sought (e.g. participant and intervention characteristics, funding sources). Describe any assumptions made about any missing or unclear information.                                                                                         | 9                               |
| Study risk of bias assessment | 11     | Specify the methods used to assess risk of bias in the included studies, including details of the tool(s) used, how many reviewers assessed each study and whether they worked independently, and if applicable, details of automation tools used in the process.                                    | 9-10                            |
| Effect measures               | 12     | Specify for each outcome the effect measure(s) (e.g. risk ratio, mean difference) used in the synthesis or presentation of results.                                                                                                                                                                  | N/A                             |
| Synthesis methods             | 13a    | Describe the processes used to decide which studies were eligible for each synthesis (e.g. tabulating the study intervention characteristics and comparing against the planned groups for each synthesis (item #5)).                                                                                 | 8-9                             |
|                               | 13b    | Describe any methods required to prepare the data for presentation or synthesis, such as handling of missing summary statistics, or data conversions.                                                                                                                                                | N/A                             |
|                               | 13c    | Describe any methods used to tabulate or visually display results of individual studies and syntheses.                                                                                                                                                                                               | N/A                             |
|                               | 13d    | Describe any methods used to synthesize results and provide a rationale for the choice(s). If meta-analysis was performed, describe the model(s), method(s) to identify the presence and extent of statistical heterogeneity, and software package(s) used.                                          | 10                              |
|                               | 13e    | Describe any methods used to explore possible causes of heterogeneity among study results (e.g. subgroup analysis, meta-regression).                                                                                                                                                                 | N/A                             |
|                               | 13f    | Describe any sensitivity analyses conducted to assess robustness of the synthesized results.                                                                                                                                                                                                         | N/A                             |
| Reporting bias assessment     | 14     | Describe any methods used to assess risk of bias due to missing results in a synthesis (arising from reporting biases).                                                                                                                                                                              | N/A                             |
| Certainty assessment          | 15     | Describe any methods used to assess certainty (or confidence) in the body of evidence for an outcome.                                                                                                                                                                                                | N/A                             |



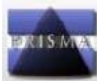

**PRISMA 2020 Checklist**

1  
2  
3  
4  
5  
6  
7  
8  
9  
10  
11  
12  
13  
14  
15  
16  
17  
18  
19  
20  
21  
22  
23  
24  
25  
26  
27  
28  
29  
30  
31  
32  
33  
34  
35  
36  
37  
38  
39  
40  
41  
42  
43  
44  
45  
46  
47

| Section and Topic                              | Item # | Checklist item                                                                                                                                                                                                                                                                       | Location where item is reported |
|------------------------------------------------|--------|--------------------------------------------------------------------------------------------------------------------------------------------------------------------------------------------------------------------------------------------------------------------------------------|---------------------------------|
| <b>RESULTS</b>                                 |        |                                                                                                                                                                                                                                                                                      |                                 |
| Study selection                                | 16a    | Describe the results of the search and selection process, from the number of records identified in the search to the number of studies included in the review, ideally using a flow diagram.                                                                                         | Figure 1                        |
|                                                | 16b    | Cite studies that might appear to meet the inclusion criteria, but which were excluded, and explain why they were excluded.                                                                                                                                                          | Supplementary                   |
| Study characteristics                          | 17     | Cite each included study and present its characteristics.                                                                                                                                                                                                                            | Table 1                         |
| Risk of bias in studies                        | 18     | Present assessments of risk of bias for each included study.                                                                                                                                                                                                                         | Table 4                         |
| Results of individual studies                  | 19     | For all outcomes, present, for each study: (a) summary statistics for each group (where appropriate) and (b) an effect estimate and its precision (e.g. confidence/credible interval), ideally using structured tables or plots.                                                     | Tables 2,3                      |
| Results of syntheses                           | 20a    | For each synthesis, briefly summarise the characteristics and risk of bias among contributing studies.                                                                                                                                                                               | 10-13                           |
|                                                | 20b    | Present results of all statistical syntheses conducted. If meta-analysis was done, present for each the summary estimate and its precision (e.g. confidence/credible interval) and measures of statistical heterogeneity. If comparing groups, describe the direction of the effect. | 10-13                           |
|                                                | 20c    | Present results of all investigations of possible causes of heterogeneity among study results.                                                                                                                                                                                       | N/A                             |
|                                                | 20d    | Present results of all sensitivity analyses conducted to assess the robustness of the synthesized results.                                                                                                                                                                           | N/A                             |
| Reporting biases                               | 21     | Present assessments of risk of bias due to missing results (arising from reporting biases) for each synthesis assessed.                                                                                                                                                              | 12-13                           |
| Certainty of evidence                          | 22     | Present assessments of certainty (or confidence) in the body of evidence for each outcome assessed.                                                                                                                                                                                  | N/A                             |
| <b>DISCUSSION</b>                              |        |                                                                                                                                                                                                                                                                                      |                                 |
| Discussion                                     | 23a    | Provide a general interpretation of the results in the context of other evidence.                                                                                                                                                                                                    | 13-15                           |
|                                                | 23b    | Discuss any limitations of the evidence included in the review.                                                                                                                                                                                                                      | 16                              |
|                                                | 23c    | Discuss any limitations of the review processes used.                                                                                                                                                                                                                                | 16                              |
|                                                | 23d    | Discuss implications of the results for practice, policy, and future research.                                                                                                                                                                                                       | 17-18                           |
| <b>OTHER INFORMATION</b>                       |        |                                                                                                                                                                                                                                                                                      |                                 |
| Registration and protocol                      | 24a    | Provide registration information for the review, including register name and registration number, or state that the review was not registered.                                                                                                                                       | 7                               |
|                                                | 24b    | Indicate where the review protocol can be accessed, or state that a protocol was not prepared.                                                                                                                                                                                       | 7                               |
|                                                | 24c    | Describe and explain any amendments to information provided at registration or in the protocol.                                                                                                                                                                                      | 7                               |
| Support                                        | 25     | Describe sources of financial or non-financial support for the review, and the role of the funders or sponsors in the review.                                                                                                                                                        | 19                              |
| Competing interests                            | 26     | Declare any competing interests of review authors.                                                                                                                                                                                                                                   | 30061990                        |
| Availability of data, code and other materials | 27     | Report which of the following are publicly available and where they can be found: template data collection forms; data extracted from included studies; data used for all analyses; analytic code; any other materials used in the review.                                           | 19                              |

From: Page MJ, McKenzie JE, Bossuyt PM, Boutron I, Hoffmann TC, Mulrow CD, et al. The PRISMA 2020 statement: an updated guideline for reporting systematic reviews. *BMJ* 2021;372:n71. doi: 10.1136/bmj.n71

For peer review only - <http://bmjopen.bmj.com/site/about/guidelines.xhtml>  
For more information, visit: <http://www.prisma-statement.org/>

## Supplementary Appendix S2

### Additional Methods

#### Search strategy used in Medline and EMBASE database

- (1) “Diagnostic techniques, ophthalmological/ or electroretinography/ or eye movement measurements/ or electronystagmography/ or electrooculography/”, (2) “Tomography, Optical Coherence/”, (3) “Optical coherence tomography.ti,ab.”, (4) “(eye-track\* or eye track\*).mp.”, (5) “Retina\* exam\*.ti,ab.”, (6) “Ophthalmic assessment\*.ti,ab.”, (7) “1 or 2 or 3 or 4 or 5 or 6”, (8) “Exp Retina/”, (9) “Retina\*.ti,ab.”, (10) “8 or 9”, (11) “7 and 10”, (12) “Exp Dementia/”, (13) “(dementia or cognitive impairment\*).ti,ab.”, (14) “12 or 13”, and (15) “11 and 14”

#### Search strategy used in PsycINFO

|                          |    |                                                                                                                                                                                                                                                                     |        |          |
|--------------------------|----|---------------------------------------------------------------------------------------------------------------------------------------------------------------------------------------------------------------------------------------------------------------------|--------|----------|
| <input type="checkbox"/> | 1  | Diagnostic techniques, ophthalmological/ or electroretinography/ or eye movement measurements/ or electronystagmography/ or electrooculography.mp. [mp=title, abstract, heading word, table of contents, key concepts, original title, tests & measures, mesh word] | 2580   | Advanced |
| <input type="checkbox"/> | 2  | Tomography/                                                                                                                                                                                                                                                         | 5330   | Advanced |
| <input type="checkbox"/> | 3  | Optical coherence tomography.ti,ab.                                                                                                                                                                                                                                 | 536    | Advanced |
| <input type="checkbox"/> | 4  | (eye-track* or eye track*).mp. [mp=title, abstract, heading word, table of contents, key concepts, original title, tests & measures, mesh word]                                                                                                                     | 7728   | Advanced |
| <input type="checkbox"/> | 5  | Retina* exam*.ti,ab.                                                                                                                                                                                                                                                | 44     | Advanced |
| <input type="checkbox"/> | 6  | Ophthalmic assessment*.ti,ab.                                                                                                                                                                                                                                       | 12     | Advanced |
| <input type="checkbox"/> | 7  | 1 or 2 or 3 or 4 or 5 or 6                                                                                                                                                                                                                                          | 15890  | Advanced |
| <input type="checkbox"/> | 8  | exp Retina/                                                                                                                                                                                                                                                         | 8932   | Advanced |
| <input type="checkbox"/> | 9  | Retina*.ti,ab.                                                                                                                                                                                                                                                      | 18697  | Advanced |
| <input type="checkbox"/> | 10 | 8 or 9                                                                                                                                                                                                                                                              | 20257  | Advanced |
| <input type="checkbox"/> | 11 | 7 and 10                                                                                                                                                                                                                                                            | 939    | Advanced |
| <input type="checkbox"/> | 12 | exp Dementia/                                                                                                                                                                                                                                                       | 85053  | Advanced |
| <input type="checkbox"/> | 13 | (dementia or cognitive impairment*).ti,ab.                                                                                                                                                                                                                          | 96290  | Advanced |
| <input type="checkbox"/> | 14 | 12 or 13                                                                                                                                                                                                                                                            | 124970 | Advanced |
| <input type="checkbox"/> | 15 | 11 and 14                                                                                                                                                                                                                                                           | 70     | Advanced |

**Supplementary Table 1.** Definitions of terminology used in the included studies

| <b>Terminology</b>                                         | <b>Number of Articles that Utilised these Terms</b> | <b>Definition</b>                                                                                                                                                                                                                                                                                                               | <b>Reference(s)</b>      |
|------------------------------------------------------------|-----------------------------------------------------|---------------------------------------------------------------------------------------------------------------------------------------------------------------------------------------------------------------------------------------------------------------------------------------------------------------------------------|--------------------------|
| <b>Optical Coherence Tomography (OCT)</b>                  | 41                                                  | Non-invasive technique to acquire high resolution, cross-sectional images of the retina                                                                                                                                                                                                                                         | Almeida 2019             |
| <b>SD-OCT</b>                                              | 18                                                  | Uses a light source with a longer-wavelength to promote deeper tissue penetration. It detects light echoes through an interferometer with a spectrometer.                                                                                                                                                                       | Adhi 2013                |
| <b>SS-OCT</b>                                              | 1                                                   | Measures light echoes using photodetectors, thus improving the signal quality in deep tissue to enhance choroid visualisation.                                                                                                                                                                                                  | Adhi 2013                |
| <b>Fluorescence Lifetime Imaging Ophthalmoscopy (FLIO)</b> | 1                                                   | Measures the autofluorescence intensity emitted by endogenous fluorophores contained within the retina to determine retinal metabolic activity.                                                                                                                                                                                 | Dysli 2017; Jentsch 2014 |
| <b>Laser Doppler Retinal Blood Flow</b>                    | 1                                                   | Measures the retinal blood flow rate, centreline blood speed and blood column diameter in a major temporal retinal vein. As the vein with the largest diameter drains the largest portion of the total retinal blood flow, the blood flow measured within this retinal vein will be representative of total retinal blood flow. | Feke 2015                |
| <b>Alzheimer's dementia (AD)</b>                           | 37                                                  | Most common form of dementia characterised by progressive deterioration in cognition, executive functioning, learning and episodic memory                                                                                                                                                                                       | Gao 2015                 |
| <b>Mild cognitive impairment (MCI)</b>                     | 19                                                  | Preclinical phase of AD characterised by cognitive decline that is significant for their age but does not compromise functioning or activities of daily living                                                                                                                                                                  | Gao 2015; Almeida 2019   |
| <b>Choroid</b>                                             | 4                                                   | Vascular layer located between the sclera and retina of the eye which supplies oxygen and nutrients to the outer third of the retina, retinal pigment epithelium and part of the optic nerve.                                                                                                                                   | Tan 2017                 |
| <b>Retinal pigment epithelium (RPE)</b>                    | 1                                                   | Single layer of pigmented, cuboidal cells which regulates the transport of nutrients, ions, and water, absorbs scattered light and partakes in phagocytosis of shed photoreceptors.                                                                                                                                             | Sparrow 2010             |
| <b>Outer nuclear layer of the retina (ONL)</b>             | 1                                                   | Contains cell bodies of photoreceptors, the rods and cones                                                                                                                                                                                                                                                                      | Balasubramaniam 2014     |
| <b>Outer plexiform layer (OPL)</b>                         | 2                                                   | Synapse between the cells located in the INL (bipolar and horizontal cells) and ONL (rods and cones) occurs in the OPL.                                                                                                                                                                                                         | Kolb 1995                |
| <b>Inner nuclear layer of the retina (INL)</b>             | 2                                                   | Composed of the cell bodies of bipolar, horizontal, interplexiform, amacrine and                                                                                                                                                                                                                                                | Balasubramaniam 2014     |

|                                                     |    |                                                                                                                                                                           |               |
|-----------------------------------------------------|----|---------------------------------------------------------------------------------------------------------------------------------------------------------------------------|---------------|
|                                                     |    | Müller cells, and occasionally displaced ganglion cells                                                                                                                   |               |
| <b>Ganglion cell inner plexiform layer (GC-IPL)</b> | 10 | Comprised of the dendrites and cell bodies of retinal ganglion cells                                                                                                      | Öztürker 2016 |
| <b>Ganglion cell complex (GCC)</b>                  | 11 | Composed of the retinal nerve fibre layer (RNFL), ganglion cell layer (GCL) and inner plexiform layer (IPL)                                                               | Öztürker 2016 |
| <b>Retinal nerve fibre layer (RNFL)</b>             | 25 | Comprised of nonmyelinated retinal ganglion cell axons that form the optic nerve                                                                                          | Shi 2019      |
| <b>Macula</b>                                       | 17 | Central, oval-shaped region of the retina comprising of a highest density of cone photoreceptions which is responsible for visual acuity                                  | Lima 2016     |
| <b>Foveal Avascular Zone (FAZ)</b>                  | 6  | Central region of the fovea, characterised by an absence of blood vessels, rods, inner retinal tissue and peak cone density. The fovea is the central area of the macula. | Chui 2012     |

**Supplementary Table 2. Summary of studies and machine used.**

| <b>Year</b> | <b>Author</b>   | <b>Method</b>                                               | <b>OCT Machine</b>                                                                       |
|-------------|-----------------|-------------------------------------------------------------|------------------------------------------------------------------------------------------|
| 2001        | Parisi          | OCT                                                         | OCT                                                                                      |
| 2006        | Iseri           | OCT                                                         | OCT Model 3000 unit                                                                      |
| 2011        | Kesler          | OCT                                                         | Stratus OCT3                                                                             |
| 2013        | Kirbas          | SD-OCT                                                      | SD-OCT                                                                                   |
| 2013        | Shen            | OCT                                                         | ZEISS Cirrus HD-OCT 4000 OCT                                                             |
| 2014        | Ascaso          | OCT                                                         | Stratus OCT3                                                                             |
| 2014        | Gharbiya        | SD-OCT                                                      | Heidelberg Spectralis with Heidelberg Eye Explorer                                       |
| 2014        | Polo            | OCT                                                         | Cirrus and Spectralis OCT devices                                                        |
| 2015        | Bambo           | OCT                                                         | Cirrus OCT                                                                               |
| 2015        | Bayhan          | SD-OCT                                                      | RTVue OCT system                                                                         |
| 2015        | Feke            | Laser Doppler retinal blood flow and OCT                    | Canon laser Doppler retinal blood flow instrument (CLBF 100, Canon) and Stratus OCT 3000 |
| 2015        | Gao             | OCT                                                         | Cirrus HD-OCT 4000                                                                       |
| 2015        | Gunes           | SD-OCT                                                      | Spectral-domain OCT (Spectral OCT SLO, OPKO / OTI Instrumentation)                       |
| 2015        | Jentsch         | OCT and fluorescence lifetime imaging ophthalmoscopy (FLIO) | Cirrus OCT 4.0                                                                           |
| 2015        | Oktem           | OCT                                                         | Zeiss Cirrus HD 5000 model OCT device                                                    |
| 2015        | Salobrar-Garcia | OCT                                                         | OCT Model 3D OCT-1000                                                                    |
| 2015        | Shi             | OCT                                                         | ZEISS Cirrus HD-OCT 4000 OCT                                                             |
| 2016        | Choi            | OCT                                                         | Cirrus High-Definition OCT (HD-OCT, software version 6.0)                                |
| 2016        | Cunha           | OCT                                                         | Frequency domain-OCT (fd-OCT) using 3D OCT-2000, software version 8.11                   |
| 2016        | Garcia-Martin   | OCT                                                         | Spectralis OCT                                                                           |
| 2016        | Knoll           | SD-OCT                                                      | SD-OCT using Spectralis HRA 1 OCT                                                        |
| 2016        | Pillai          | SD-OCT                                                      | SD-OCT using Cirrus 4000 HD-OCT                                                          |
| 2016        | Trebbastoni     | SD-OCT                                                      | Heidelberg Spectralis with Heidelberg Eye Explorer                                       |
| 2017        | Ferrari         | OCT                                                         | Fourier-domain OCT Heidelberg Spectralis                                                 |
| 2017        | Mendez-Gomez    | SD-OCT                                                      | SD-OCT using Spectralis                                                                  |
| 2018        | Bulut           | OCT angiography (OCTA)                                      | Commercial spectral domain OCTA                                                          |
| 2018        | Jiang           | 1. OCTA<br>OCT                                              | 1. Zeiss Angioplex OCTA<br>2. Zeiss OCT                                                  |
| 2018        | Lahme           | OCTA                                                        | RTVue XR Avanti with AngioVue                                                            |
| 2018        | Shao            | SD-OCT                                                      | SD-OCT using Ultrahigh-resolution OCT (UHR-OCT) device                                   |
| 2018        | Uchida          | OCT                                                         | Cirrus 4000 HD-OCT                                                                       |

|    |      |                 |                                                  |     |                                                                                                                                                                                           |
|----|------|-----------------|--------------------------------------------------|-----|-------------------------------------------------------------------------------------------------------------------------------------------------------------------------------------------|
| 1  | 2019 | Almeida         | SS-OCT                                           |     | SS-OCT (DRI OCT Triton)                                                                                                                                                                   |
| 2  | 2019 | Cipollini       | SD-OCT                                           |     | SD-OCT<br>RTVue                                                                                                                                                                           |
| 3  | 2019 | Haan            | SD-OCT                                           |     | Heidelberg Spectralis spectral domain<br>OCT                                                                                                                                              |
| 4  | 2019 | Haan            | 1. Fundus<br>photography<br>2. SD-OCT<br>3. OCTA |     | 1. Topcon TRC 50DX type IA<br>2. Enhanced Depth Imaging OCT (EDI-<br>OCT) using Heidelberg<br>Spectralis spectral domain-OCT<br>3. Zeiss Model 5000 spectral domain-OCT<br>with Angioplex |
| 5  | 2019 | Kim             | OCT                                              |     | CirrusHD-OCTsoftwareversion<br>6.0.0.599                                                                                                                                                  |
| 6  | 2019 | Salobrar-Garcia | OCT                                              |     | OCT Model 3D OCT-1000 and OCT<br>Spectralis                                                                                                                                               |
| 7  | 2019 | Tao             | OCT                                              |     | Optovue AngioVue<br>System                                                                                                                                                                |
| 8  | 2019 | Yoon            | 1. OCTA<br>SD-OCT                                |     | 1. Zeiss Cirrus HD-5000<br>SD-OCT with AngioPlex OCTA<br>2. Cirrus HD-OCT 5000 device                                                                                                     |
| 9  | 2019 | Zhang           | 1. OCT<br>OCTA                                   |     | RTVue-XR OCT Avanti System with<br>split-spectrumamplitude-decorrelation<br>angiography (SSADA)<br>software                                                                               |
| 10 | 2020 | Ashimatey       | OCTA                                             |     | Spectral Domain OCTA: Cirrus HD-<br>OCTA                                                                                                                                                  |
| 11 | 2020 | Chua            | OCTA                                             |     | Zeiss Cirrus HD-5000 Spectral-Domain<br>OCT with AngioPlex Octa (Carl Zeiss<br>Meditec)                                                                                                   |
| 12 | 2020 | Criscuolo       | SD-OCT<br>OCTA                                   | and | 1. SD-OCT<br>2. OCTA (XR Avanti AngioVue OCTA)                                                                                                                                            |
| 13 | 2020 | Jindahra        | OCT                                              |     | Cirrus HD-OCT Model 4000 (Carl Zeiss<br>Meditec)                                                                                                                                          |
| 14 | 2020 | Jorge           | OCT                                              |     | Cirrus HD-OCT System (Carl Zeiss<br>Meditec)                                                                                                                                              |
| 15 | 2020 | Karakahya       | OCT                                              |     | OCT Cirrus HD-OCT, Carl Zeiss<br>Ophthalmic System Inc                                                                                                                                    |
| 16 | 2020 | Lemmens         | OCT                                              |     | RTVue XR Avanti (Optovue, Fremont,<br>CA, USA; software version 2015.1.1.98)                                                                                                              |
| 17 | 2020 | Mammadova       | SD-OCT                                           |     | High-resolution spectral-domain OCT<br>imaging (Zeiss Cirrus 5000 HD-OCT)                                                                                                                 |
| 18 | 2020 | Marquie         | OCT                                              |     | 3D - OCT Maestro                                                                                                                                                                          |
| 19 | 2020 | Mavilio         | OCT                                              |     | Zeiss Cirrus HD OCT-500 (Carl Zeiss<br>Meditec)                                                                                                                                           |
| 20 | 2020 | Salobra-Garcia  | OCT<br>OCTA                                      |     | Spectralis OCT, RTVue XR OCTA and<br>Cirrus 5000 Angioplex                                                                                                                                |
| 21 | 2020 | Sanchez         | OCT                                              |     | 3D-OCT Maestro, Fast map software<br>version 8.40                                                                                                                                         |
| 22 | 2020 | Sen             | OCT                                              |     | Cirrus HD-OCT Model 4000, Carl Zeiss<br>Meditex                                                                                                                                           |
| 23 | 2020 | Uchida          | OCT                                              |     | Cirrus 4000 HD-OCT (Zeiss, Oberkochen,<br>Germany)                                                                                                                                        |
| 24 | 2020 | Van De Kreeke   | OCT                                              |     | Spectralis, Heidelberg                                                                                                                                                                    |

|      |              |                                |                                                                                                                                    |
|------|--------------|--------------------------------|------------------------------------------------------------------------------------------------------------------------------------|
|      |              | Fundas photography             | Topcon TRC 50DX type IA                                                                                                            |
| 2020 | Wu           | OCTA                           | RTVue XR Avanti spectral domain OCT system (Optovue) with AngioVue software                                                        |
| 2021 | Biscetti     | OCT, OCTA                      | Spectralis HRA + CT2 (Heidelberg Engineering)                                                                                      |
| 2021 | Janez-Garcia | OCT<br>OCTA                    | 3D OCT-1000 Topcon, Japan                                                                                                          |
| 2021 | Li           | OCT                            | Heidelberg Spectralis OCT                                                                                                          |
| 2021 | Mei          | OCTA                           | Cirrus 5000 Angioplex, Zeiss Meditec                                                                                               |
| 2021 | Robbins      | OCTA                           | Zeiss Cirrus HD-OCT 5000 with Angioplex OCTA                                                                                       |
| 2021 | Robbins      | OCT                            | Zeiss Cirrus HD-OCT 5000 Spectral Domain OCT With Angioplex OCT Angiography                                                        |
| 2021 | Wang         | OCTA<br><br>Fundas photography | Optovue Angiovue System (software ReVue version 2017.1.0.155)<br>Version 1.5.0.0, NIDEK CO, LTD                                    |
| 2021 | Wong         | OCTA                           | Zeiss CIRRUS HD-OCT 5000,                                                                                                          |
| 2021 | Zabel        | SD-OCT<br>OCTA                 | RTVue XR Avanti SD-OCT device with AngioVue software                                                                               |
| 2021 | Zhao         | OCT                            | Stratus Oct Model 3000 (Carl Zeiss Meditec)                                                                                        |
| 2022 | Montorio     | SD-OCT<br><br>OCTA             | RTVue XR Avanti with AngioVue<br><br>XR Avanti AngioVue OCTA (software ReVue version 2017.1.0.151, Optovue Inc., Fremont, CA, USA) |
