# Supplementary material for: Association between retinal markers and cognition in older adults: a systematic review
Source: PubMed Central journal article supplement — BMJ Open. 2022 Jun 20;12(6):e054657. doi: 10.1136/bmjopen-2021-054657 (PMC9214387; doi:10.1136/bmjopen-2021-054657), 2022-06-20
Supplement: bmjopen-2021-054657supp002.pdf [file bmjopen-2021-054657supp002.pdf]

## Supplementary Appendix S2

### Additional Methods

#### Search strategy used in Medline and EMBASE database

- (1) “Diagnostic techniques, ophthalmological/ or electroretinography/ or eye movement measurements/ or electronystagmography/ or electrooculography/”, (2) “Tomography, Optical Coherence/”, (3) “Optical coherence tomography.ti.ab.”, (4) “(eye-track\* or eye track\*).mp.”, (5) “Retina\* exam\*.ti.ab.”, (6) “Ophthalmic assessment\*.ti.ab.”, (7) “1 or 2 or 3 or 4 or 5 or 6”, (8) “Exp Retina/”, (9) “Retina\*.ti.ab.”, (10) “8 or 9”, (11) “7 and 10”, (12) “Exp Dementia/”, (13) “(dementia or cognitive impairment\*).ti.ab.”, (14) “12 or 13”, and (15) “11 and 14”

#### Search strategy used in PsycINFO

|                          |    |                                                                                                                                                                                                                                                                     |        |          |
|--------------------------|----|---------------------------------------------------------------------------------------------------------------------------------------------------------------------------------------------------------------------------------------------------------------------|--------|----------|
| <input type="checkbox"/> | 1  | Diagnostic techniques, ophthalmological/ or electroretinography/ or eye movement measurements/ or electronystagmography/ or electrooculography.mp. [mp=title, abstract, heading word, table of contents, key concepts, original title, tests & measures, mesh word] | 2580   | Advanced |
| <input type="checkbox"/> | 2  | Tomography/                                                                                                                                                                                                                                                         | 5330   | Advanced |
| <input type="checkbox"/> | 3  | Optical coherence tomography.ti.ab.                                                                                                                                                                                                                                 | 536    | Advanced |
| <input type="checkbox"/> | 4  | (eye-track* or eye track*).mp. [mp=title, abstract, heading word, table of contents, key concepts, original title, tests & measures, mesh word]                                                                                                                     | 7728   | Advanced |
| <input type="checkbox"/> | 5  | Retina* exam*.ti.ab.                                                                                                                                                                                                                                                | 44     | Advanced |
| <input type="checkbox"/> | 6  | Ophthalmic assessment*.ti.ab.                                                                                                                                                                                                                                       | 12     | Advanced |
| <input type="checkbox"/> | 7  | 1 or 2 or 3 or 4 or 5 or 6                                                                                                                                                                                                                                          | 15890  | Advanced |
| <input type="checkbox"/> | 8  | exp Retina/                                                                                                                                                                                                                                                         | 8932   | Advanced |
| <input type="checkbox"/> | 9  | Retina*.ti.ab.                                                                                                                                                                                                                                                      | 18697  | Advanced |
| <input type="checkbox"/> | 10 | 8 or 9                                                                                                                                                                                                                                                              | 20257  | Advanced |
| <input type="checkbox"/> | 11 | 7 and 10                                                                                                                                                                                                                                                            | 939    | Advanced |
| <input type="checkbox"/> | 12 | exp Dementia/                                                                                                                                                                                                                                                       | 85053  | Advanced |
| <input type="checkbox"/> | 13 | (dementia or cognitive impairment*).ti.ab.                                                                                                                                                                                                                          | 96290  | Advanced |
| <input type="checkbox"/> | 14 | 12 or 13                                                                                                                                                                                                                                                            | 124970 | Advanced |
| <input type="checkbox"/> | 15 | 11 and 14                                                                                                                                                                                                                                                           | 70     | Advanced |

**Supplementary Table 1.** Definitions of terminology used in the included studies

| <b>Terminology</b>                                         | <b>Number of Articles that Utilised these Terms</b> | <b>Definition</b>                                                                                                                                                                                                                                                                                                               | <b>Reference(s)</b>      |
|------------------------------------------------------------|-----------------------------------------------------|---------------------------------------------------------------------------------------------------------------------------------------------------------------------------------------------------------------------------------------------------------------------------------------------------------------------------------|--------------------------|
| <b>Optical Coherence Tomography (OCT)</b>                  | 41                                                  | Non-invasive technique to acquire high resolution, cross-sectional images of the retina                                                                                                                                                                                                                                         | Almeida 2019             |
| <b>SD-OCT</b>                                              | 18                                                  | Uses a light source with a longer-wavelength to promote deeper tissue penetration. It detects light echoes through an interferometer with a spectrometer.                                                                                                                                                                       | Adhi 2013                |
| <b>SS-OCT</b>                                              | 1                                                   | Measures light echoes using photodetectors, thus improving the signal quality in deep tissue to enhance choroid visualisation.                                                                                                                                                                                                  | Adhi 2013                |
| <b>Fluorescence Lifetime Imaging Ophthalmoscopy (FLIO)</b> | 1                                                   | Measures the autofluorescence intensity emitted by endogenous fluorophores contained within the retina to determine retinal metabolic activity.                                                                                                                                                                                 | Dysli 2017; Jentsch 2014 |
| <b>Laser Doppler Retinal Blood Flow</b>                    | 1                                                   | Measures the retinal blood flow rate, centreline blood speed and blood column diameter in a major temporal retinal vein. As the vein with the largest diameter drains the largest portion of the total retinal blood flow, the blood flow measured within this retinal vein will be representative of total retinal blood flow. | Feke 2015                |
| <b>Alzheimer's dementia (AD)</b>                           | 37                                                  | Most common form of dementia characterised by progressive deterioration in cognition, executive functioning, learning and episodic memory                                                                                                                                                                                       | Gao 2015                 |
| <b>Mild cognitive impairment (MCI)</b>                     | 19                                                  | Preclinical phase of AD characterised by cognitive decline that is significant for their age but does not compromise functioning or activities of daily living                                                                                                                                                                  | Gao 2015; Almeida 2019   |
| <b>Choroid</b>                                             | 4                                                   | Vascular layer located between the sclera and retina of the eye which supplies oxygen and nutrients to the outer third of the retina, retinal pigment epithelium and part of the optic nerve.                                                                                                                                   | Tan 2017                 |
| <b>Retinal pigment epithelium (RPE)</b>                    | 1                                                   | Single layer of pigmented, cuboidal cells which regulates the transport of nutrients, ions, and water, absorbs scattered light and partakes in phagocytosis of shed photoreceptors.                                                                                                                                             | Sparrow 2010             |
| <b>Outer nuclear layer of the retina (ONL)</b>             | 1                                                   | Contains cell bodies of photoreceptors, the rods and cones                                                                                                                                                                                                                                                                      | Balasubramaniam 2014     |
| <b>Outer plexiform layer (OPL)</b>                         | 2                                                   | Synapse between the cells located in the INL (bipolar and horizontal cells) and ONL (rods and cones) occurs in the OPL.                                                                                                                                                                                                         | Kolb 1995                |
| <b>Inner nuclear layer of the retina (INL)</b>             | 2                                                   | Composed of the cell bodies of bipolar, horizontal, interplexiform, amacrine and                                                                                                                                                                                                                                                | Balasubramaniam 2014     |

|                                                     |    |                                                                                                                                                                           |               |
|-----------------------------------------------------|----|---------------------------------------------------------------------------------------------------------------------------------------------------------------------------|---------------|
|                                                     |    | Müller cells, and occasionally displaced ganglion cells                                                                                                                   |               |
| <b>Ganglion cell inner plexiform layer (GC-IPL)</b> | 10 | Comprised of the dendrites and cell bodies of retinal ganglion cells                                                                                                      | Öztürker 2016 |
| <b>Ganglion cell complex (GCC)</b>                  | 11 | Comprised of the retinal nerve fibre layer (RNFL), ganglion cell layer (GCL) and inner plexiform layer (IPL)                                                              | Öztürker 2016 |
| <b>Retinal nerve fibre layer (RNFL)</b>             | 25 | Comprised of nonmyelinated retinal ganglion cell axons that form the optic nerve                                                                                          | Shi 2019      |
| <b>Macula</b>                                       | 17 | Central, oval-shaped region of the retina comprising of a highest density of cone photoreceptions which is responsible for visual acuity                                  | Lima 2016     |
| <b>Foveal Avascular Zone (FAZ)</b>                  | 6  | Central region of the fovea, characterised by an absence of blood vessels, rods, inner retinal tissue and peak cone density. The fovea is the central area of the macula. | Chui 2012     |

**Supplementary Table 2. Summary of studies and machine used.**

| Year | Author          | Method                                                      | OCT Machine                                                                              |
|------|-----------------|-------------------------------------------------------------|------------------------------------------------------------------------------------------|
| 2001 | Parisi          | OCT                                                         | OCT                                                                                      |
| 2006 | Iseri           | OCT                                                         | OCT Model 3000 unit                                                                      |
| 2011 | Kesler          | OCT                                                         | Stratus OCT3                                                                             |
| 2013 | Kirbas          | SD-OCT                                                      | SD-OCT                                                                                   |
| 2013 | Shen            | OCT                                                         | ZEISS Cirrus HD-OCT 4000 OCT                                                             |
| 2014 | Ascaso          | OCT                                                         | Stratus OCT3                                                                             |
| 2014 | Gharbiya        | SD-OCT                                                      | Heidelberg Spectralis with Heidelberg Eye Explorer                                       |
| 2014 | Polo            | OCT                                                         | Cirrus and Spectralis OCT devices                                                        |
| 2015 | Bambo           | OCT                                                         | Cirrus OCT                                                                               |
| 2015 | Bayhan          | SD-OCT                                                      | RTVue OCT system                                                                         |
| 2015 | Feke            | Laser Doppler retinal blood flow and OCT                    | Canon laser Doppler retinal blood flow instrument (CLBF 100, Canon) and Stratus OCT 3000 |
| 2015 | Gao             | OCT                                                         | Cirrus HD-OCT 4000                                                                       |
| 2015 | Gunes           | SD-OCT                                                      | Spectral-domain OCT (Spectral OCT SLO, OPKO / OTI Instrumentation)                       |
| 2015 | Jentsch         | OCT and fluorescence lifetime imaging ophthalmoscopy (FLIO) | Cirrus OCT 4.0                                                                           |
| 2015 | Oktem           | OCT                                                         | Zeiss Cirrus HD 5000 model OCT device                                                    |
| 2015 | Salobrar-Garcia | OCT                                                         | OCT Model 3D OCT-1000                                                                    |
| 2015 | Shi             | OCT                                                         | ZEISS Cirrus HD-OCT 4000 OCT                                                             |
| 2016 | Choi            | OCT                                                         | Cirrus High-Definition OCT (HD-OCT, software version 6.0)                                |
| 2016 | Cunha           | OCT                                                         | Frequency domain-OCT (fd-OCT) using 3D OCT-2000, software version 8.11                   |
| 2016 | Garcia-Martin   | OCT                                                         | Spectralis OCT                                                                           |
| 2016 | Knoll           | SD-OCT                                                      | SD-OCT using Spectralis HRA 1 OCT                                                        |
| 2016 | Pillai          | SD-OCT                                                      | SD-OCT using Cirrus 4000 HD-OCT                                                          |
| 2016 | Trebbastoni     | SD-OCT                                                      | Heidelberg Spectralis with Heidelberg Eye Explorer                                       |
| 2017 | Ferrari         | OCT                                                         | Fourier-domain OCT Heidelberg Spectralis                                                 |
| 2017 | Mendez-Gomez    | SD-OCT                                                      | SD-OCT using Spectralis                                                                  |
| 2018 | Bulut           | OCT angiography (OCTA)                                      | Commercial spectral domain OCTA                                                          |
| 2018 | Jiang           | 1. OCTA<br>OCT                                              | 1. Zeiss Angioplex OCTA<br>2. Zeiss OCT                                                  |
| 2018 | Lahme           | OCTA                                                        | RTVue XR Avanti with AngioVue                                                            |
| 2018 | Shao            | SD-OCT                                                      | SD-OCT using Ultrahigh-resolution OCT (UHR-OCT) device                                   |
| 2018 | Uchida          | OCT                                                         | Cirrus 4000 HD-OCT                                                                       |

|      |                 |                                               |                                                                                                                                                                                 |
|------|-----------------|-----------------------------------------------|---------------------------------------------------------------------------------------------------------------------------------------------------------------------------------|
| 2019 | Almeida         | SS-OCT                                        | SS-OCT (DRI OCT Triton)                                                                                                                                                         |
| 2019 | Cipollini       | SD-OCT                                        | SD-OCT<br>RTVue                                                                                                                                                                 |
| 2019 | Haan            | SD-OCT                                        | Heidelberg Spectralis spectral domain OCT                                                                                                                                       |
| 2019 | Haan            | 1. Fundus photography<br>2. SD-OCT<br>3. OCTA | 1. Topcon TRC 50DX type IA<br>2. Enhanced Depth Imaging OCT (EDI-OCT) using Heidelberg Spectralis spectral domain-OCT<br>3. Zeiss Model 5000 spectral domain-OCT with Angioplex |
| 2019 | Kim             | OCT                                           | CirrusHD-OCTsoftwareversion 6.0.0.599                                                                                                                                           |
| 2019 | Salobrar-Garcia | OCT                                           | OCT Model 3D OCT-1000 and OCT Spectralis                                                                                                                                        |
| 2019 | Tao             | OCT                                           | Optovue AngioVue System                                                                                                                                                         |
| 2019 | Yoon            | 1. OCTA<br>SD-OCT                             | 1. Zeiss Cirrus HD-5000 SD-OCT with AngioPlex OCTA<br>2. Cirrus HD-OCT 5000 device                                                                                              |
| 2019 | Zhang           | 1. OCT<br>OCTA                                | RTVue-XR OCT Avanti System with split-spectrumamplitude-decorrelation angiography (SSADA) software                                                                              |
| 2020 | Ashimatey       | OCTA                                          | Spectral Domain OCTA: Cirrus HD-OCTA                                                                                                                                            |
| 2020 | Chua            | OCTA                                          | Zeiss Cirrus HD-5000 Spectral-Domain OCT with AngioPlex Octa (Carl Zeiss Meditec)                                                                                               |
| 2020 | Criscuolo       | SD-OCT<br>OCTA                                | and<br>1. SD-OCT<br>2. OCTA (XR Avanti AngioVue OCTA)                                                                                                                           |
| 2020 | Jindahra        | OCT                                           | Cirrus HD-OCT Model 4000 (Carl Zeiss Meditec)                                                                                                                                   |
| 2020 | Jorge           | OCT                                           | Cirrus HD-OCT System (Carl Zeiss Meditec)                                                                                                                                       |
| 2020 | Karakahya       | OCT                                           | OCT Cirrus HD-OCT, Carl Zeiss Ophthalmic System Inc                                                                                                                             |
| 2020 | Lemmens         | OCT                                           | RTVue XR Avanti (Optovue, Fremont, CA, USA; software version 2015.1.1.98)                                                                                                       |
| 2020 | Mammadova       | SD-OCT                                        | High-resolution spectral-domain OCT imaging (Zeiss Cirrus 5000 HD-OCT)                                                                                                          |
| 2020 | Marquie         | OCT                                           | 3D - OCT Maestro                                                                                                                                                                |
| 2020 | Mavilio         | OCT                                           | Zeiss Cirrus HD OCT-500 (Carl Zeiss Meditec)                                                                                                                                    |
| 2020 | Salobra-Garcia  | OCT<br>OCTA                                   | Spectralis OCT, RTVue XR OCTA and Cirrus 5000 Angioplex                                                                                                                         |
| 2020 | Sanchez         | OCT                                           | 3D-OCT Maestro, Fast map software version 8.40                                                                                                                                  |
| 2020 | Sen             | OCT                                           | Cirrus HD-OCT Model 4000, Carl Zeiss Meditec                                                                                                                                    |
| 2020 | Uchida          | OCT                                           | Cirrus 4000 HD-OCT (Zeiss, Oberkochen, Germany)                                                                                                                                 |
| 2020 | Van De Kreeke   | OCT                                           | Spectralis, Heidelberg                                                                                                                                                          |

|      |              |                                |                                                                                                                                    |
|------|--------------|--------------------------------|------------------------------------------------------------------------------------------------------------------------------------|
|      |              | Fundas photography             | Topcon TRC 50DX type IA                                                                                                            |
| 2020 | Wu           | OCTA                           | RTVue XR Avanti spectral domain OCT system (Optovue) with AngioVue software                                                        |
| 2021 | Biscetti     | OCT, OCTA                      | Spectralis HRA + CT2 (Heidelberg Engineering)                                                                                      |
| 2021 | Janez-Garcia | OCT<br>OCTA                    | 3D OCT-1000 Topcon, Japan                                                                                                          |
| 2021 | Li           | OCT                            | Heidelberg Spectralis OCT                                                                                                          |
| 2021 | Mei          | OCTA                           | Cirrus 5000 Angioplex, Zeiss Meditec                                                                                               |
| 2021 | Robbins      | OCTA                           | Zeiss Cirrus HD-OCT 5000 with Angioplex OCTA                                                                                       |
| 2021 | Robbins      | OCT                            | Zeiss Cirrus HD-OCT 5000 Spectral Domain OCT With Angioplex OCT Angiography                                                        |
| 2021 | Wang         | OCTA<br><br>Fundas photography | Optovue Angiovue System (software ReVue version 2017.1.0.155)<br>Version 1.5.0.0, NIDEK CO, LTD                                    |
| 2021 | Wong         | OCTA                           | Zeiss CIRRUS HD-OCT 5000,                                                                                                          |
| 2021 | Zabel        | SD-OCT<br>OCTA                 | RTVue XR Avanti SD-OCT device with AngioVue software                                                                               |
| 2021 | Zhao         | OCT                            | Stratus Oct Model 3000 (Carl Zeiss Meditec)                                                                                        |
| 2022 | Montorio     | SD-OCT<br><br>OCTA             | RTVue XR Avanti with AngioVue<br><br>XR Avanti AngioVue OCTA (software ReVue version 2017.1.0.151, Optovue Inc., Fremont, CA, USA) |
